# Supplementary material for: Spin-enhanced electrosynthesis of amino acids on oxide-derived chiral bismuth nanohelices
Source: Research Square preprint supplement (doi:10.21203/rs.3.rs-8549248/v1), 2026-01-27
Supplement: Supplementary file 1 [file 62651c8f3af35a51157c8874.docx]

Supplementary Information

**Spin-enhanced electrosynthesis of amino acids on oxide-derived chiral bismuth nanohelices**

*Yang Yang1,2,* *Yufeng Li1,2, Bojun Shi1,2, Lixin Xu1,2, Xi Wang3, Yuchen Wu4,* *Baipeng Yin1 & Chuang Zhang1,**

1Key Laboratory of Photochemistry, Beijing National Laboratory for Molecular Sciences, Institute of Chemistry, Chinese Academy of Sciences, Beijing 100190, China
2University of Chinese Academy of Sciences, Beijing 100049, China

3School of Physical Science and Engineering, Beijing Jiaotong University, Beijing 100049, China

4College of Chemistry, Jilin University, Changchun 130012, China

*e-mail: [yinbaipeng@iccas.ac.cn](mailto:yinbaipeng@iccas.ac.cn); [zhangc@iccas.ac.cn](mailto:zhangc@iccas.ac.cn).

**This file includes:**

**Supplementary Figures 1-47.**

**Supplementary Table 1.**

**Supplementary References.**

**Supplementary Figures and Table**


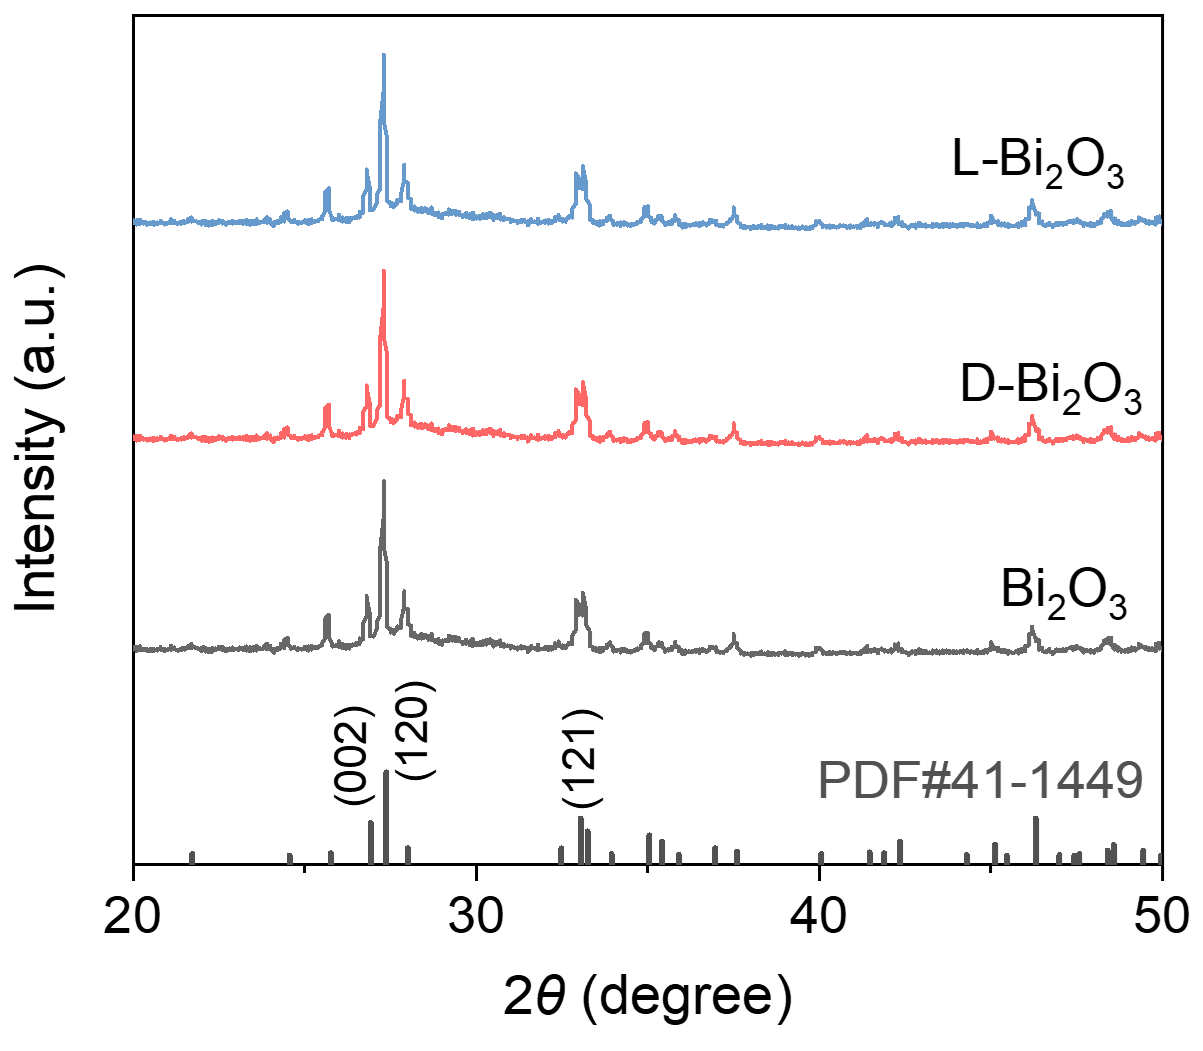


**Supplementary Figure 1.** XRD spectra of L-Bi2O3 (blue), D-Bi2O3 (red) and achiral Bi2O3 (grey).


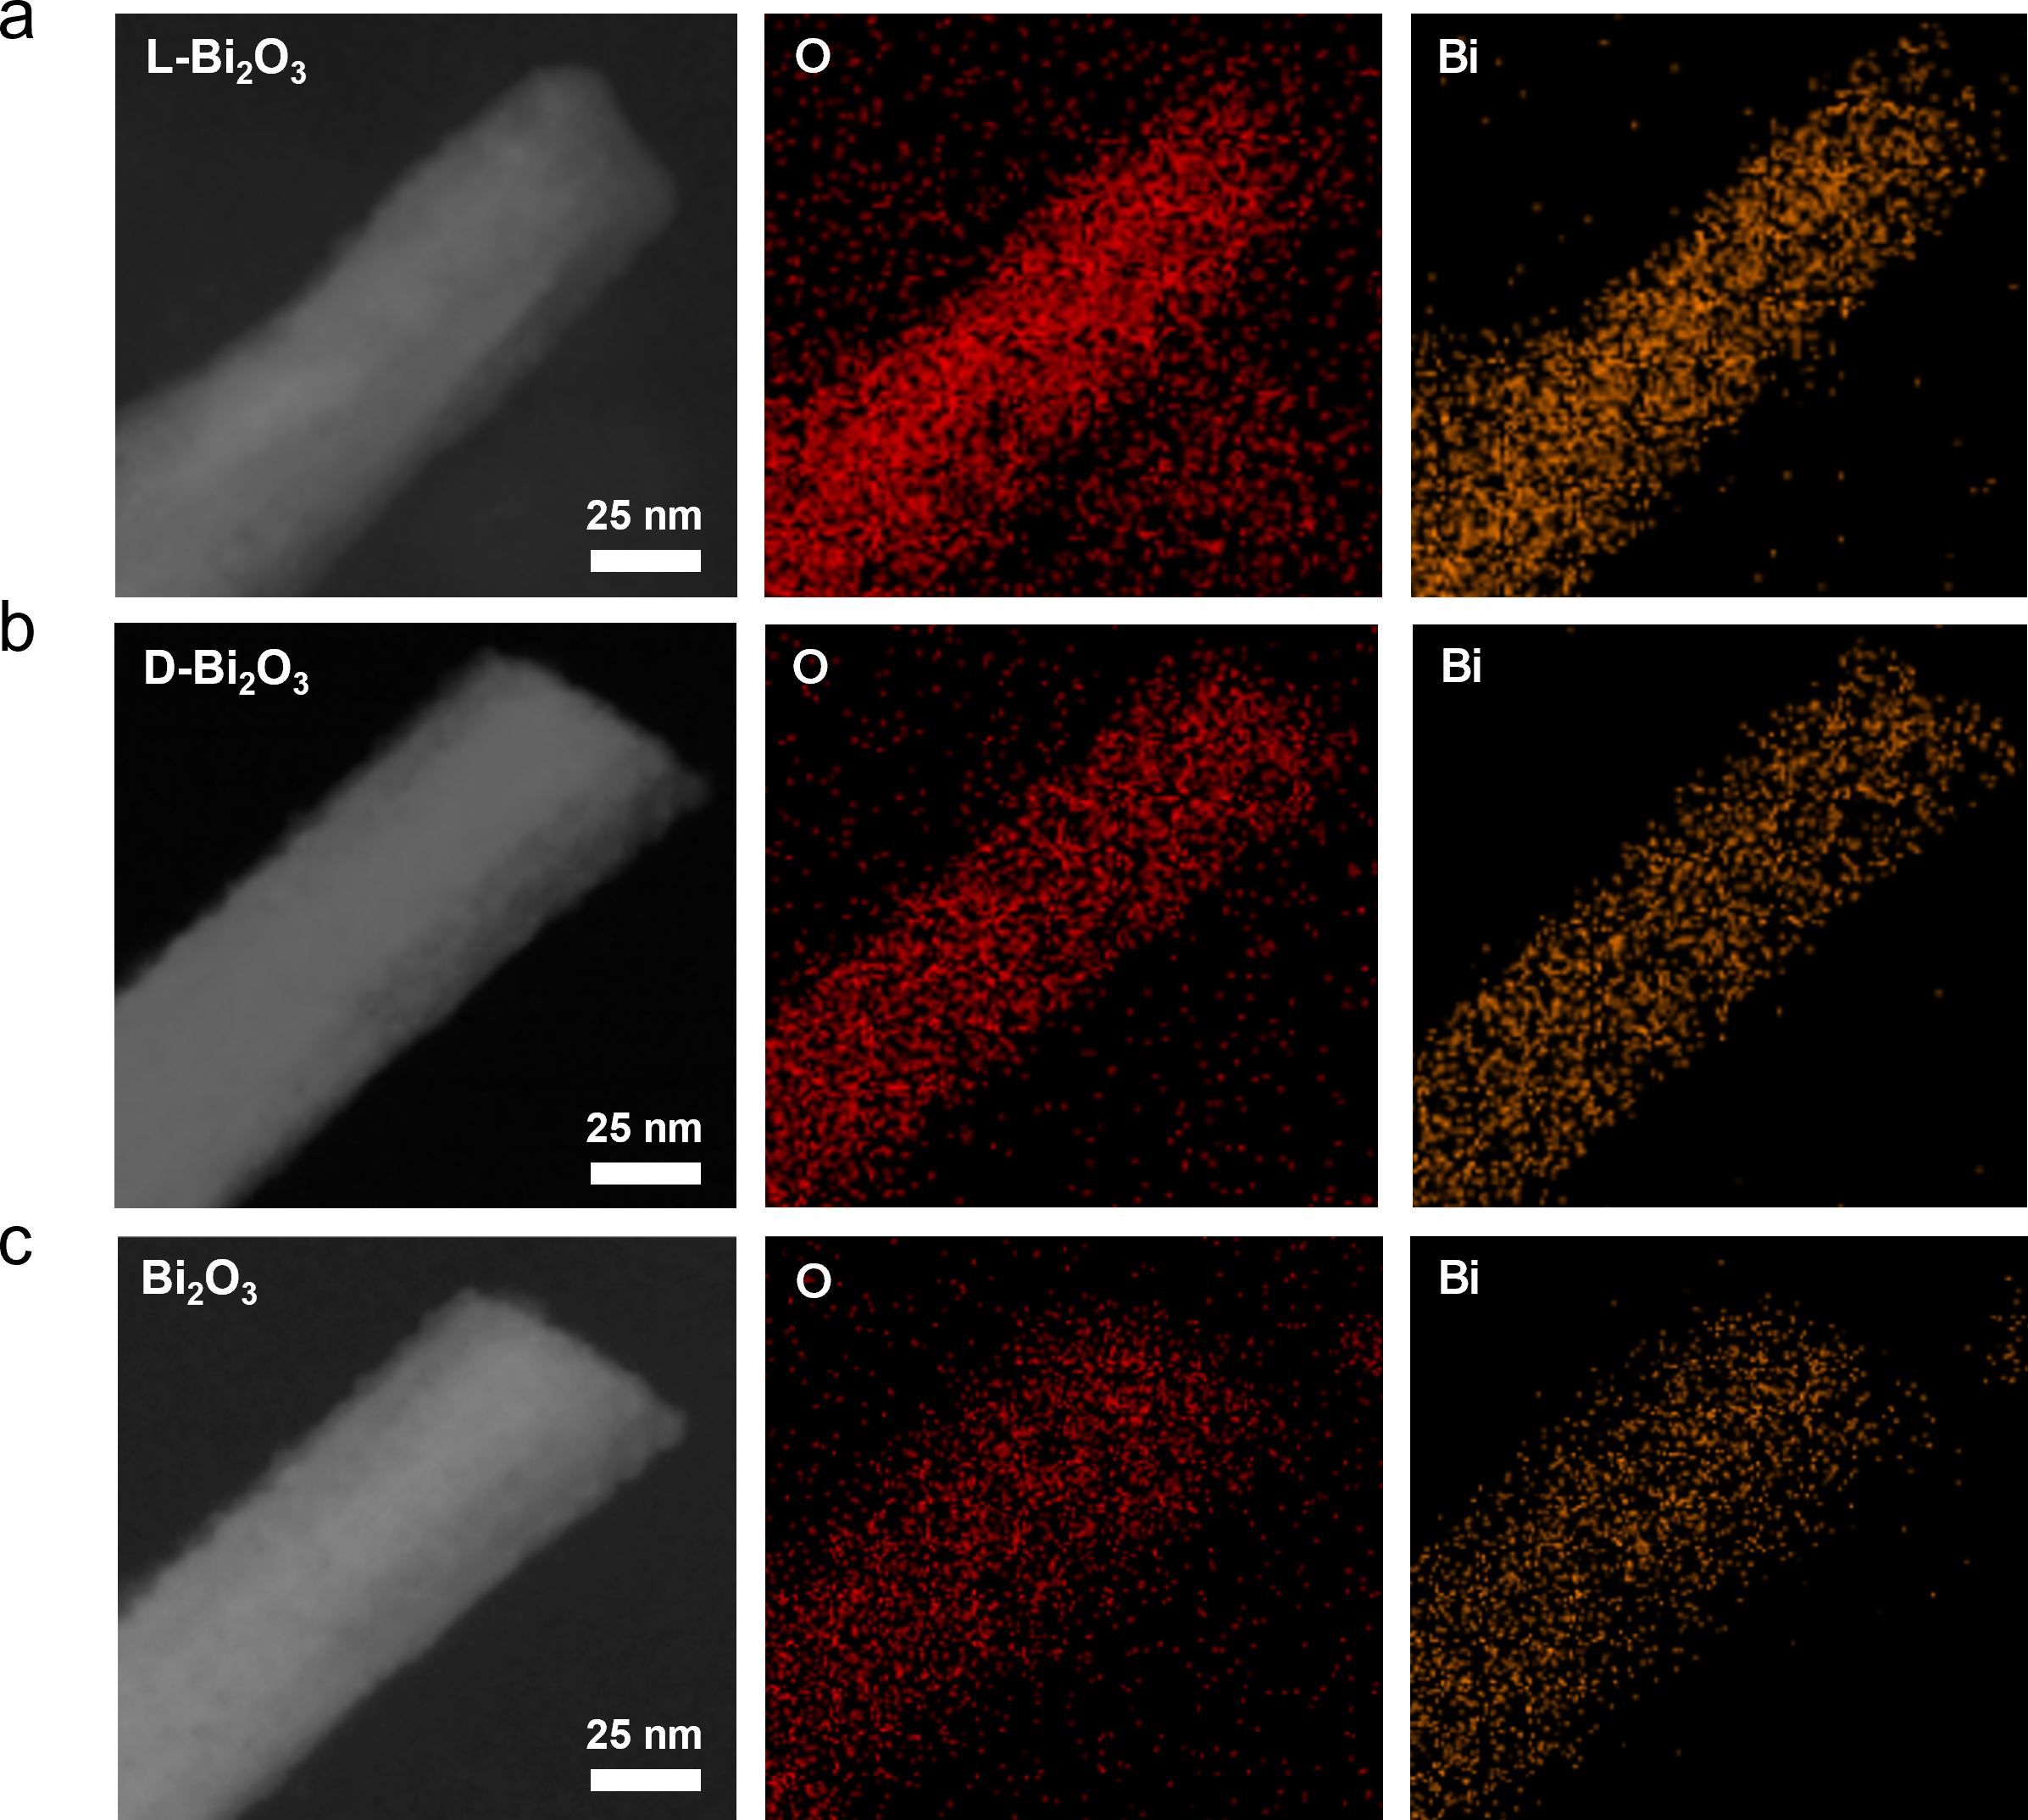


**Supplementary Figure 2.** Energy-dispersive X-ray spectroscopy (EDS) of (a) L-Bi2O3, (b) D-Bi2O3 and (c) achiral Bi2O3.


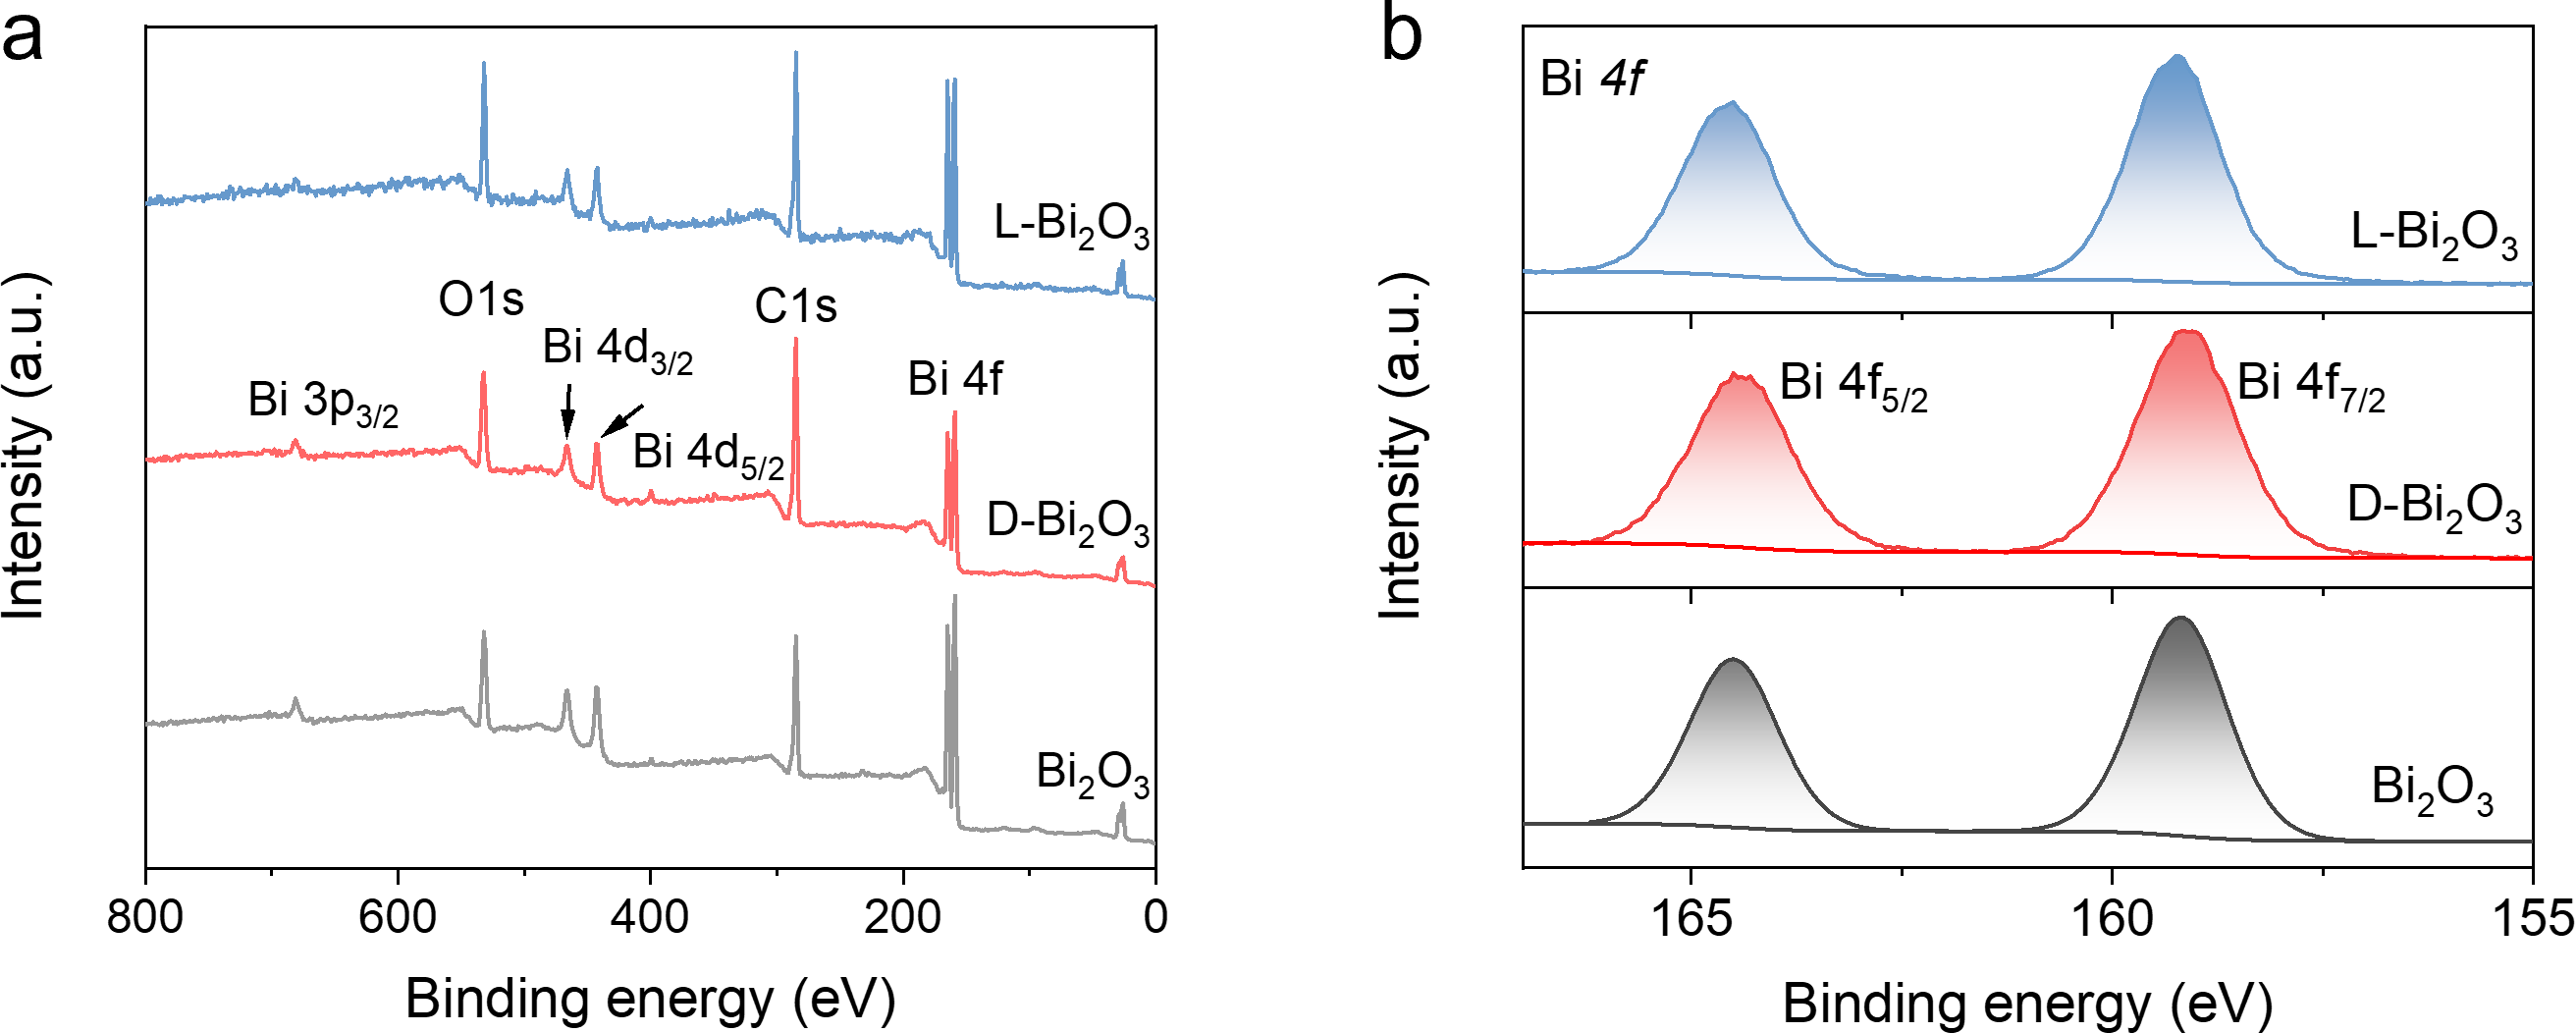


**Supplementary Figure 3.** (a) XPS survey spectra of L-Bi2O3, D-Bi2O3 and achiral Bi2O3. (b) High-resolution of Bi 4f XPS spectra of L-Bi2O3, D-Bi2O3 and achiral Bi2O3.


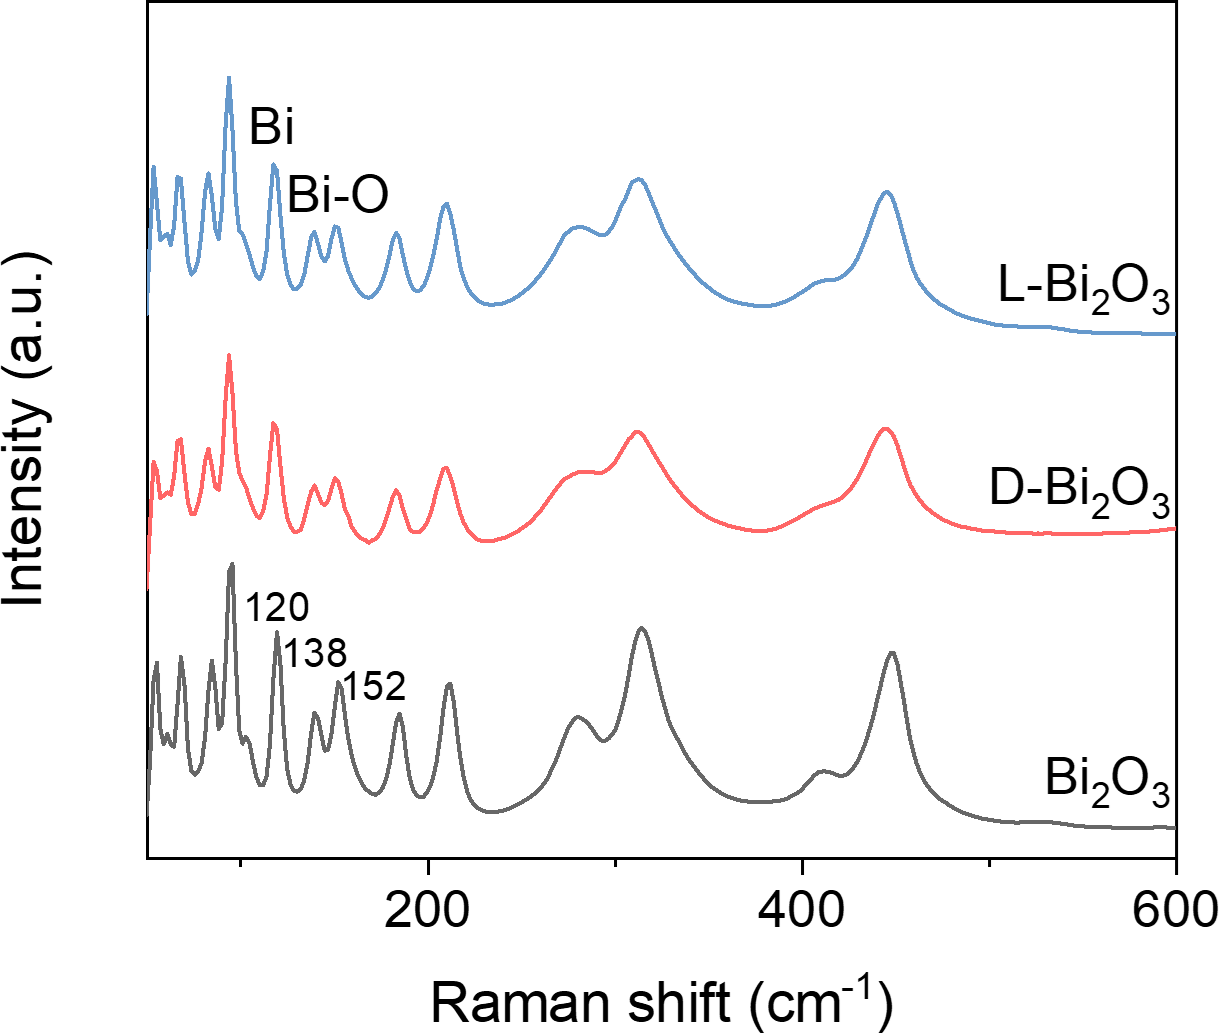


**Supplementary Figure 4.** Raman spectrum of L-Bi2O3, D-Bi2O3 and achiral Bi2O3.


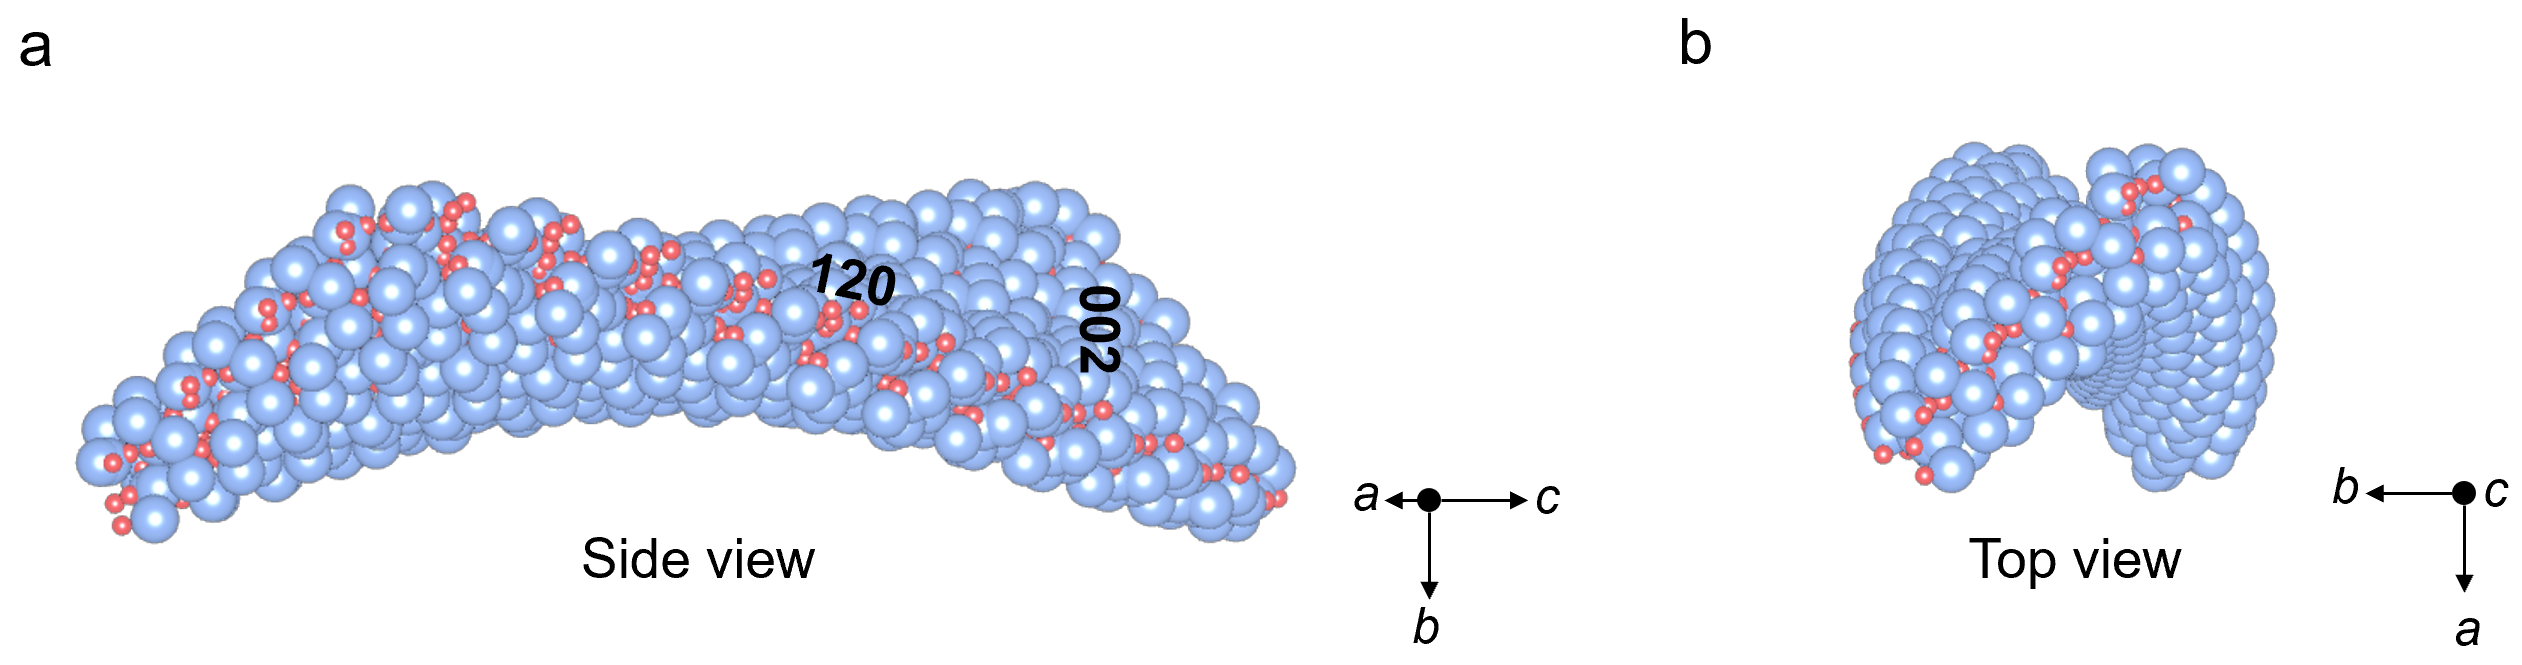


**Supplementary Figure 5.** The twisted structure of Bi2O3 nanohelices from (a) side view and (b) top view.


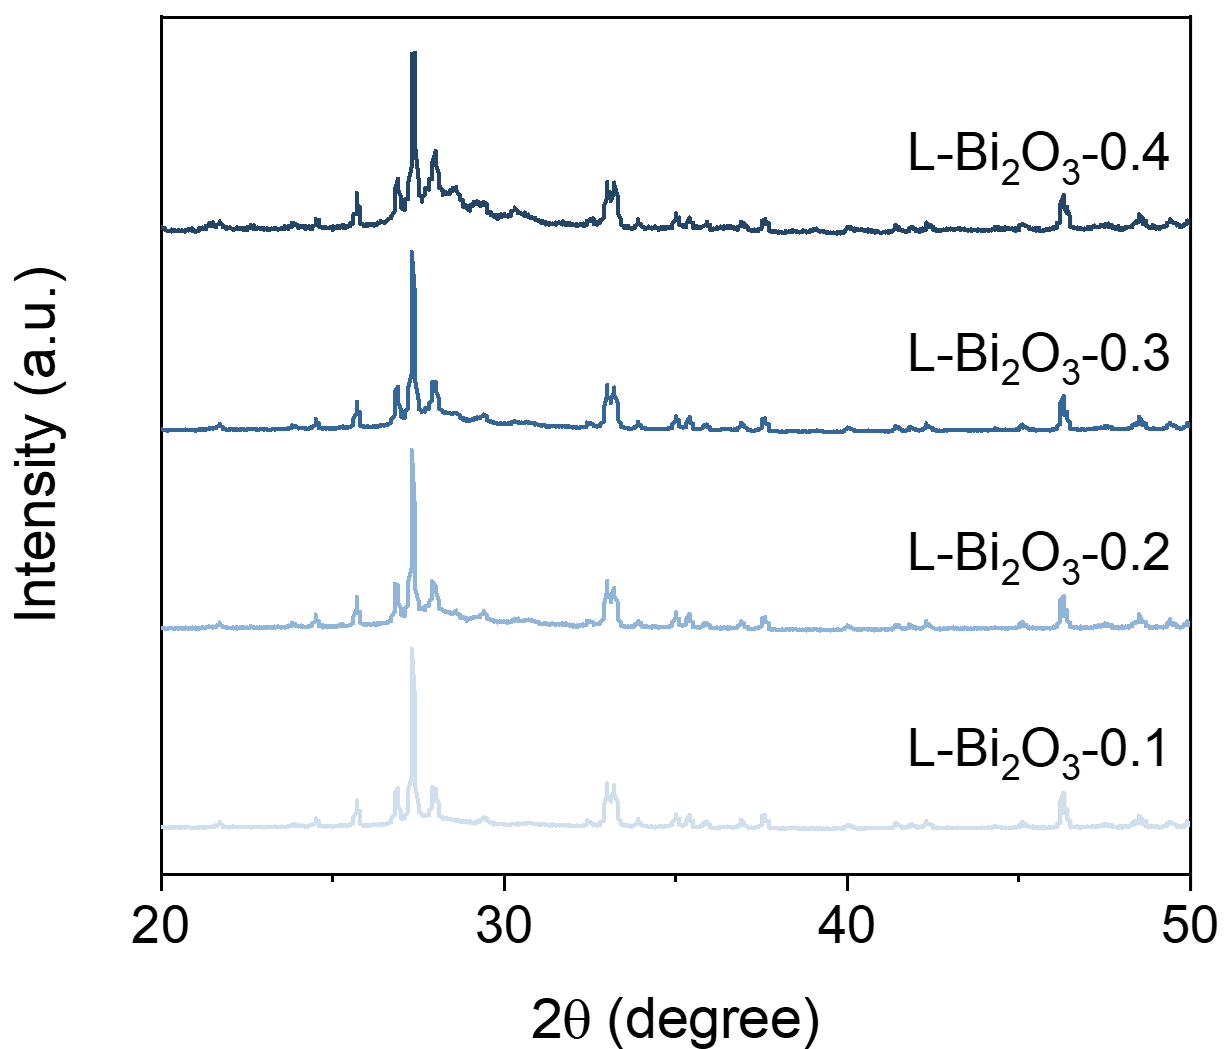


**Supplementary Figure 6.** XRD spectra of L-Bi2O3 with different L-Cys/Bi ratios from 0.1 to 0.4.


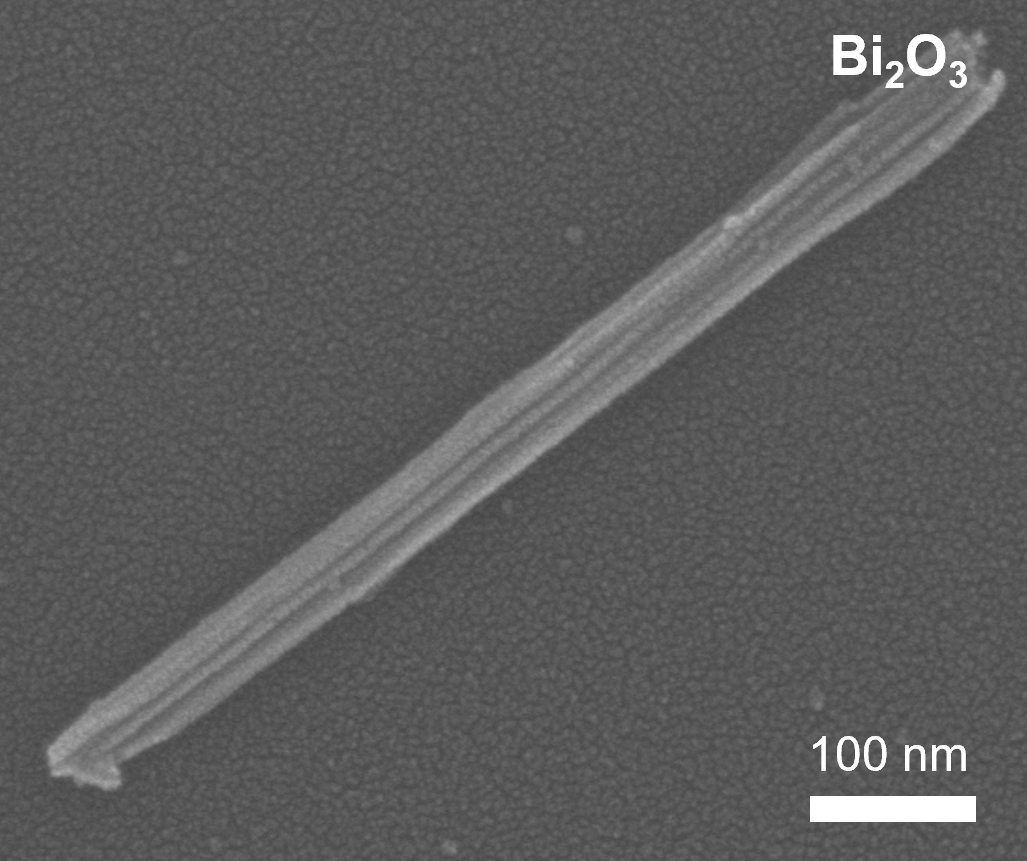


**Supplementary Figure 7.** SEM image of achiral Bi2O3.


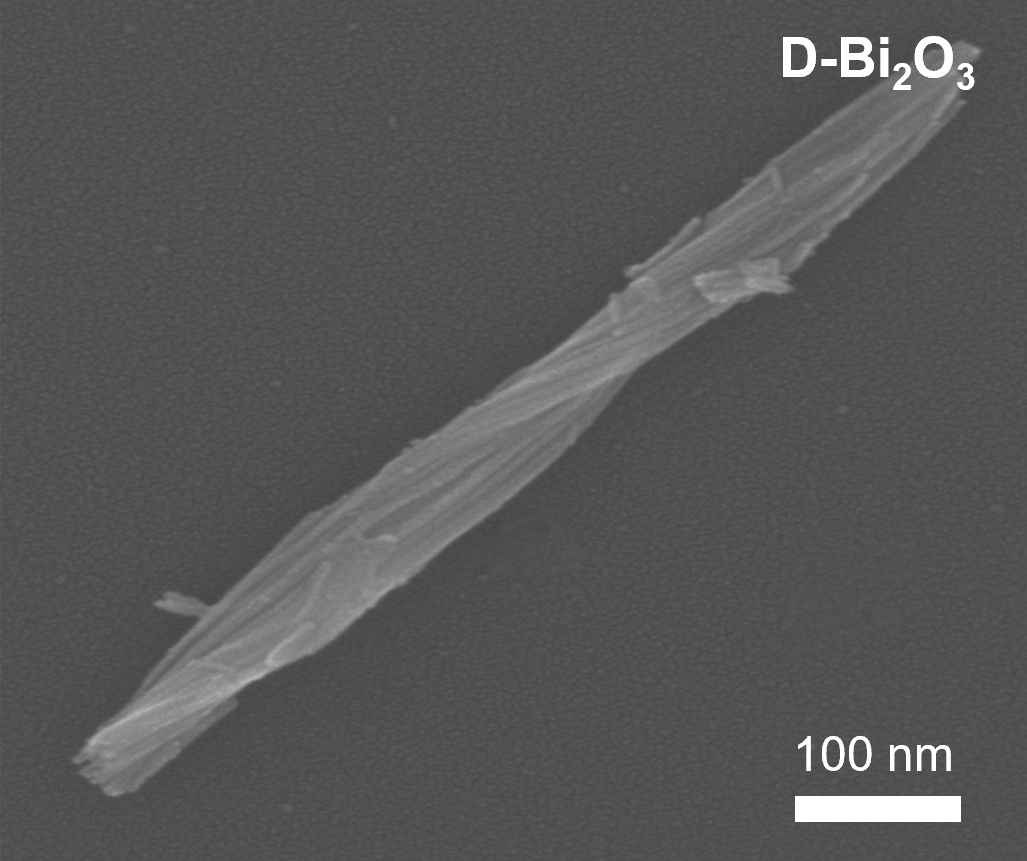


**Supplementary Figure 8.** SEM image of D-Bi2O3.


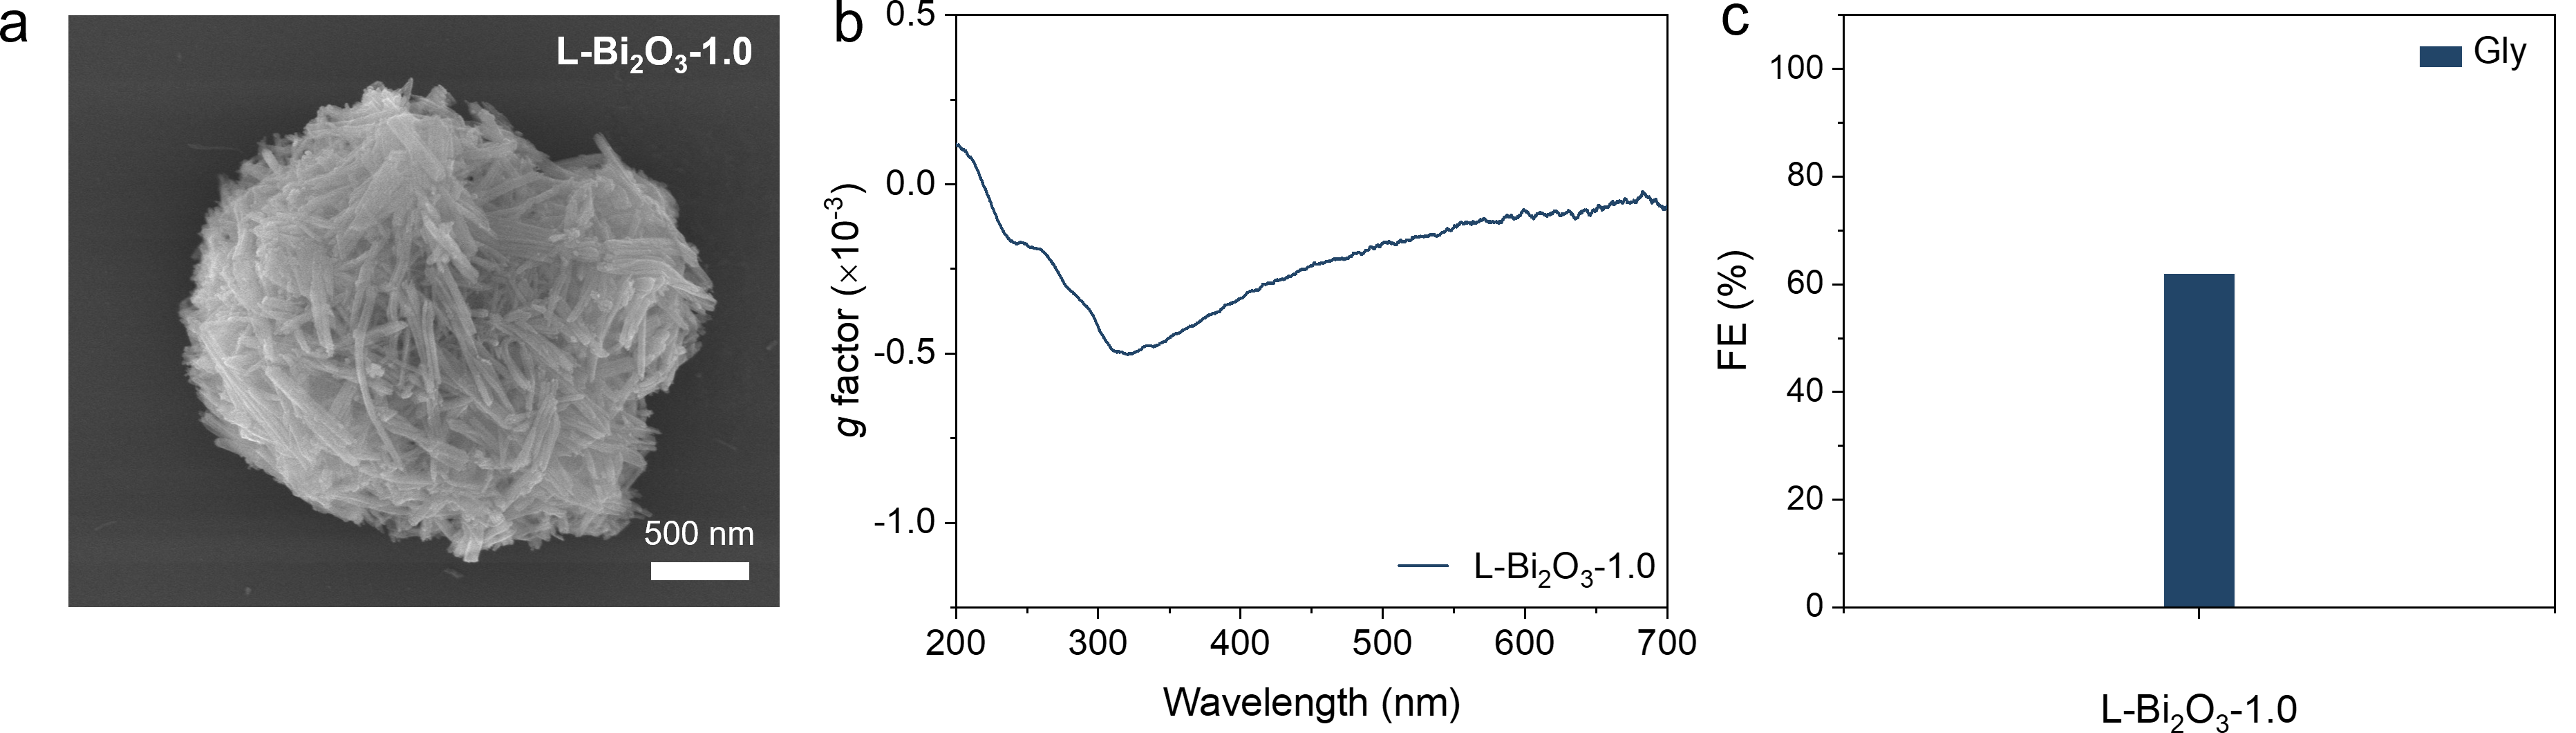


**Supplementary Figure 9.** SEM image of L-Bi2O3 with the ratio of L-Cys/Bi (1:1).


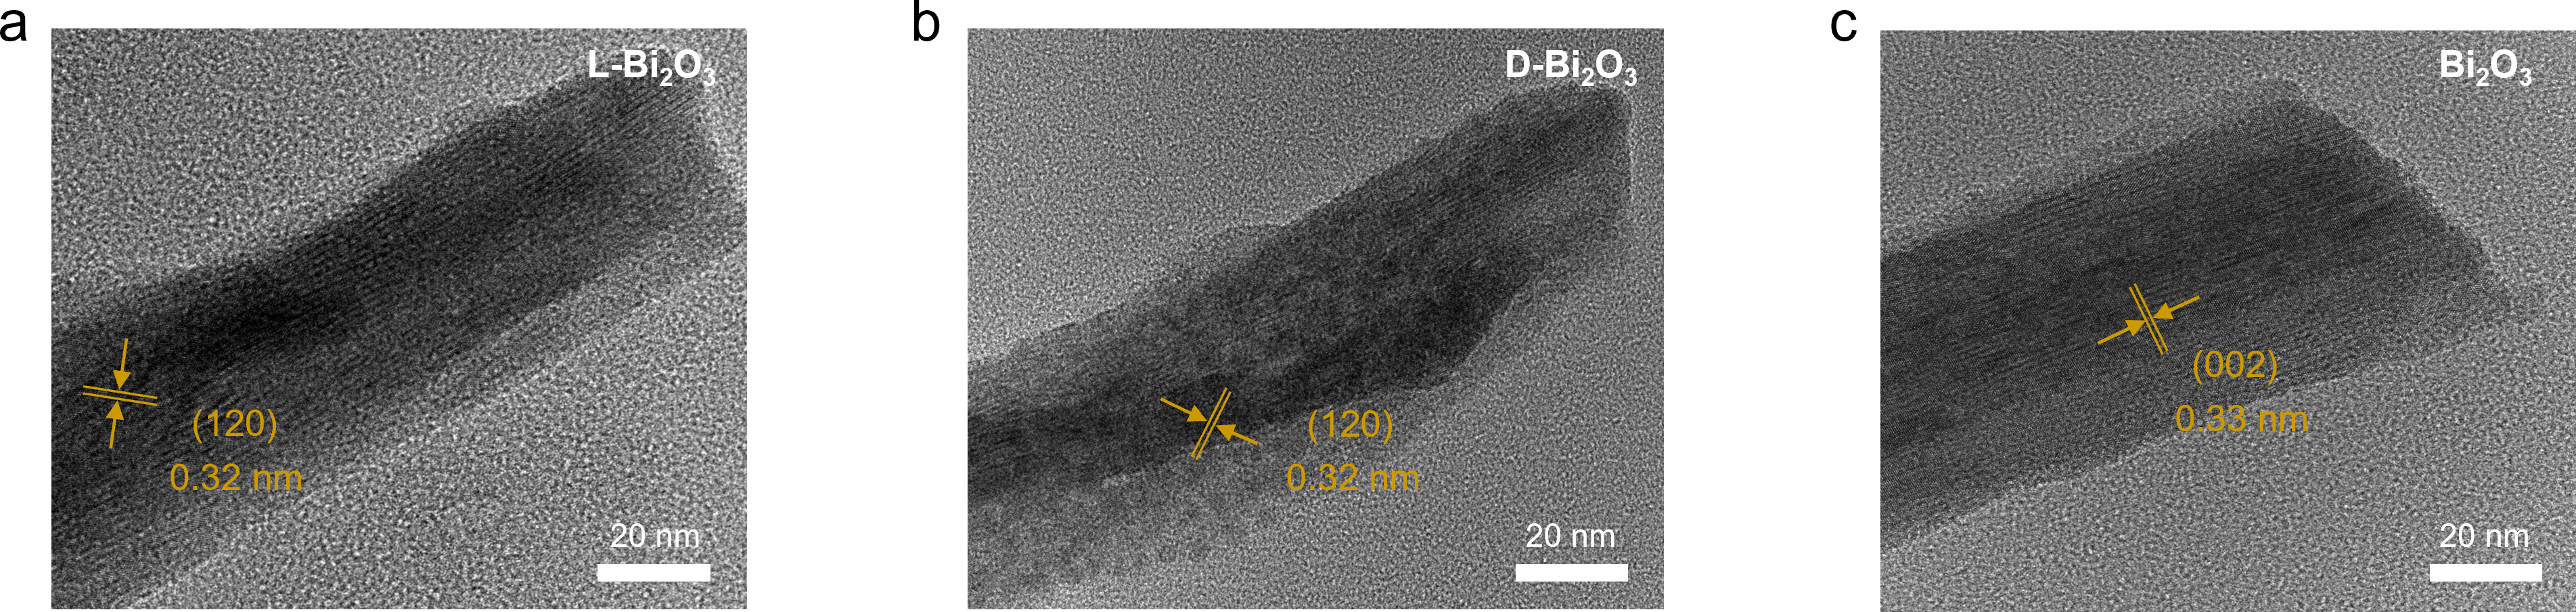


**Supplementary Figure 10.** HRTEM images of (a) L-Bi2O3, (b) D-Bi2O3, and (c) achiral Bi2O3. The lattice spacings of 0.32 nm in L- and D-Bi2O3 were observed, corresponding to the (120) planes. The lattice spacings of 0.33 nm in Bi2O3 were observed, corresponding to the (002) planes. The scale bar is 20 nm.


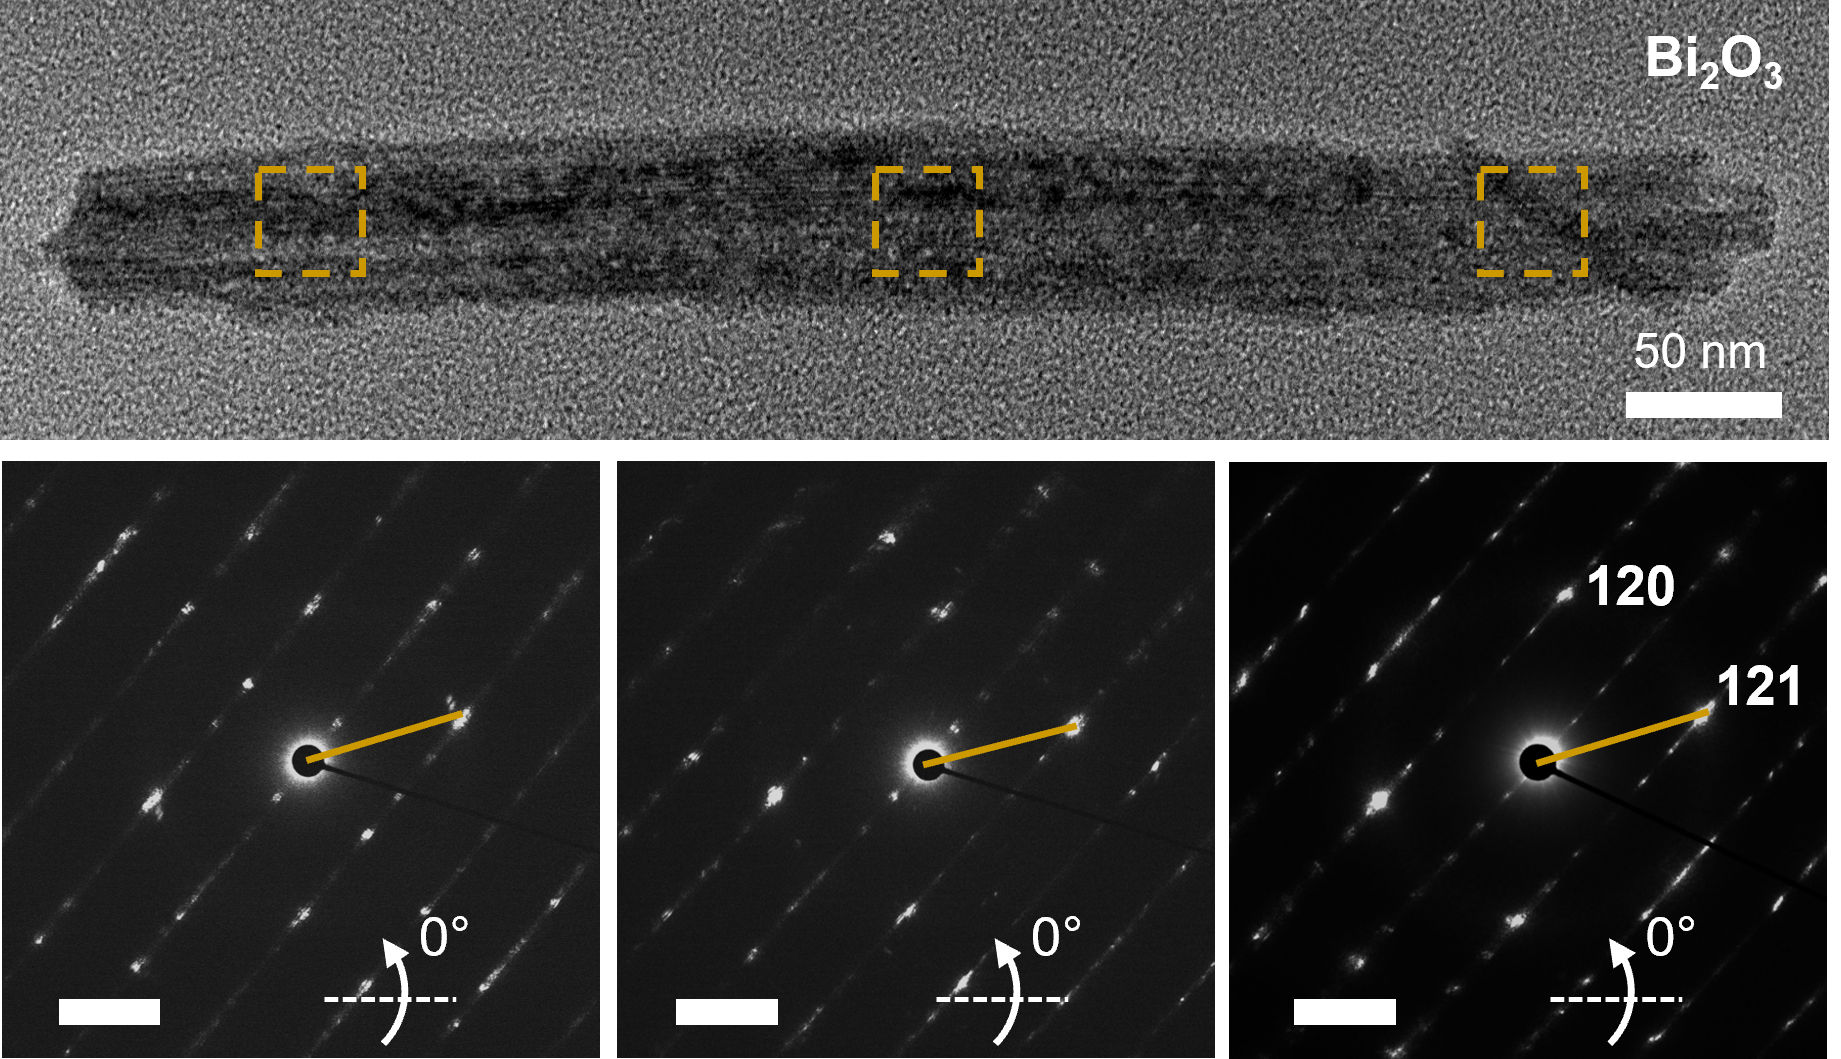


**Supplementary Figure 11.** HRTEM image and corresponding FDs of achiral Bi2O3. Scale bar: 2 1/nm.


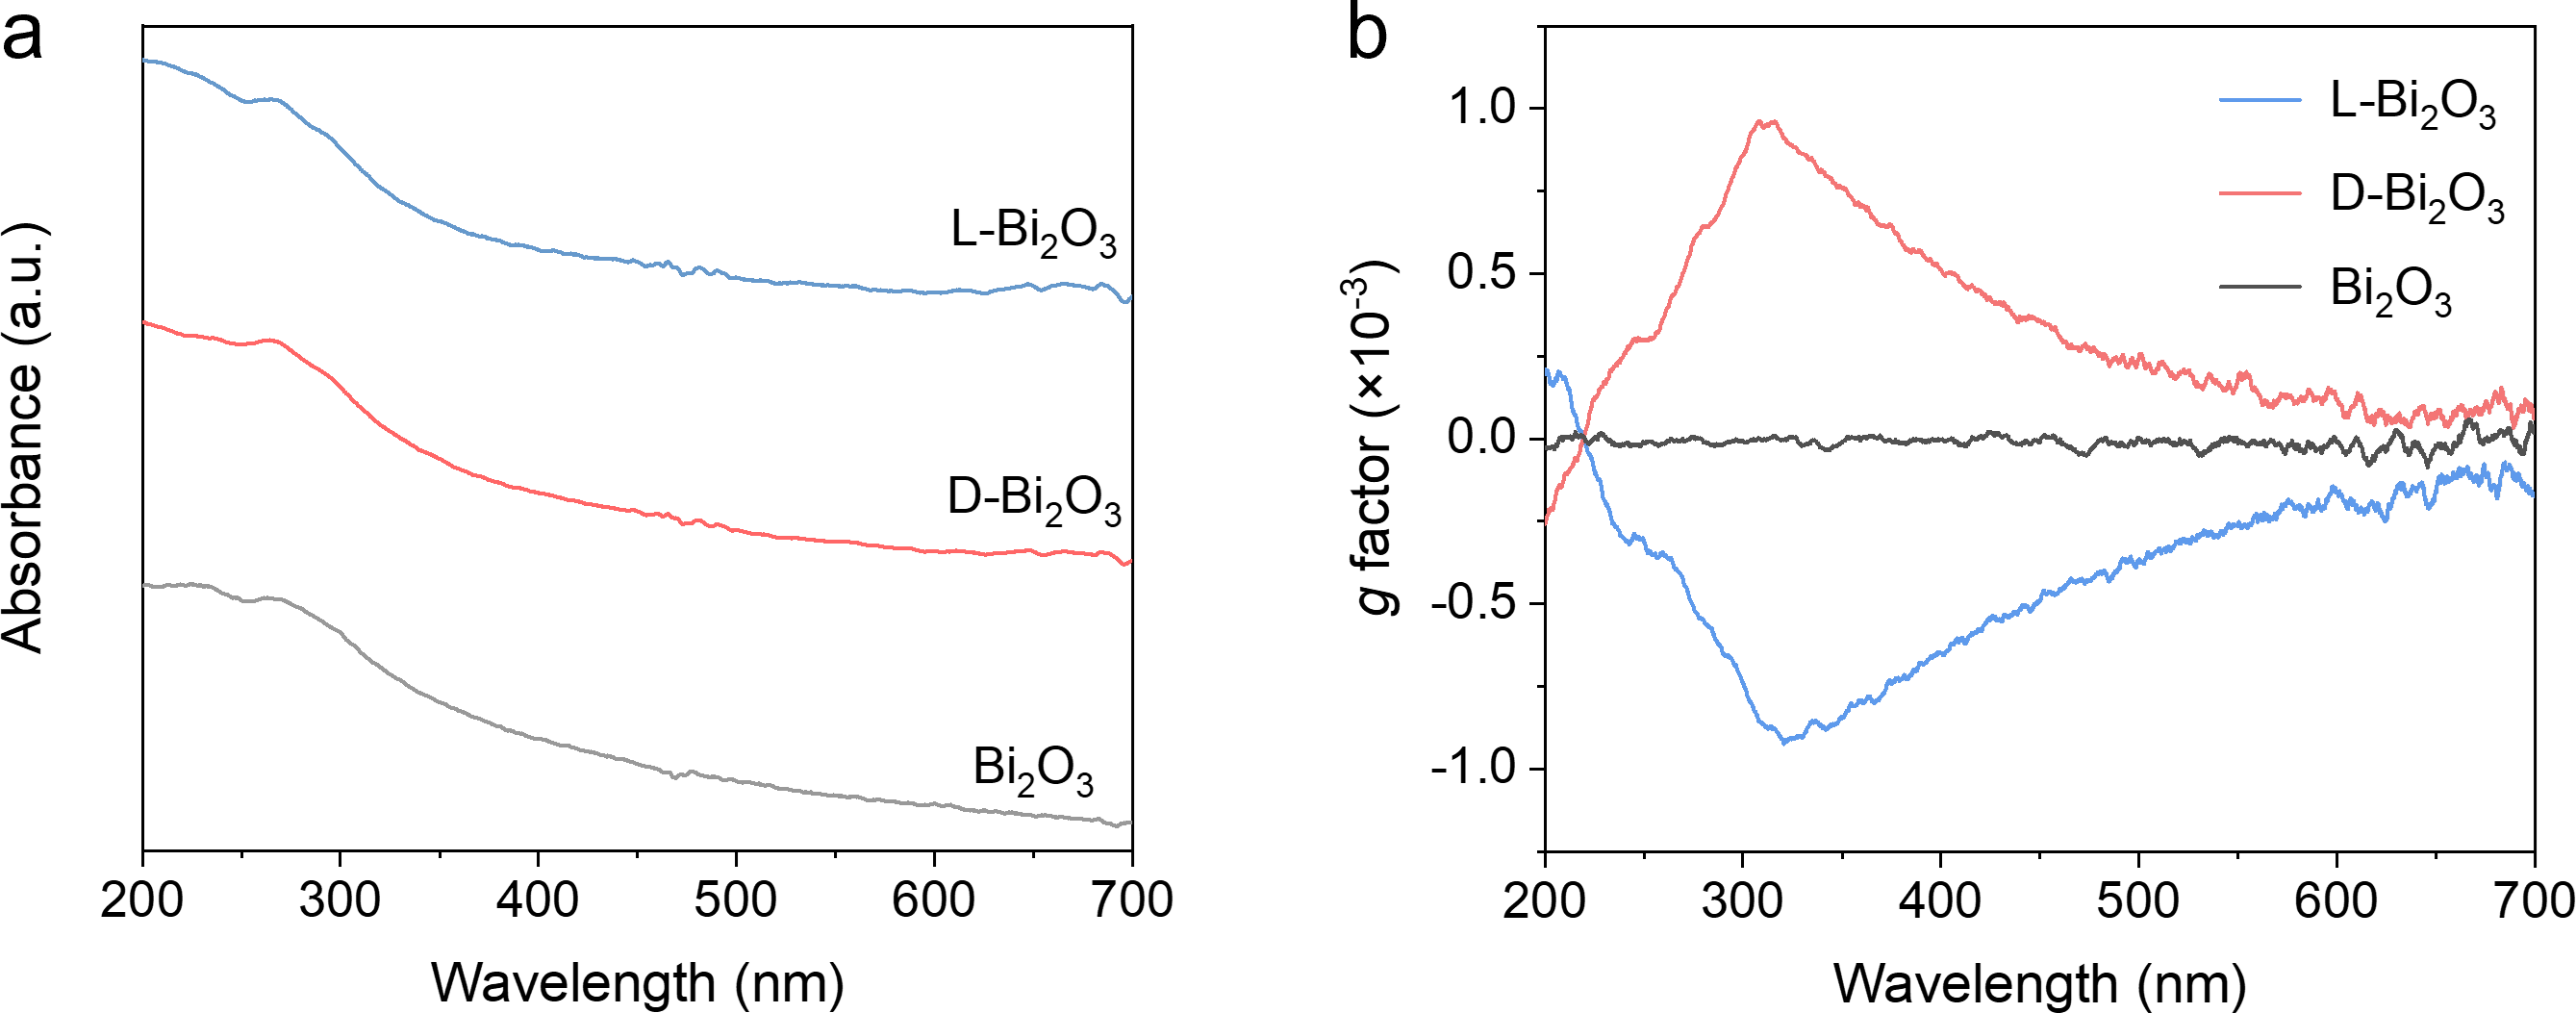


**Supplementary Figure 12.** (a) UV-vis spectra and (b) *g* factor spectra of L-Bi2O3, D-Bi2O3 and achiral Bi2O3.


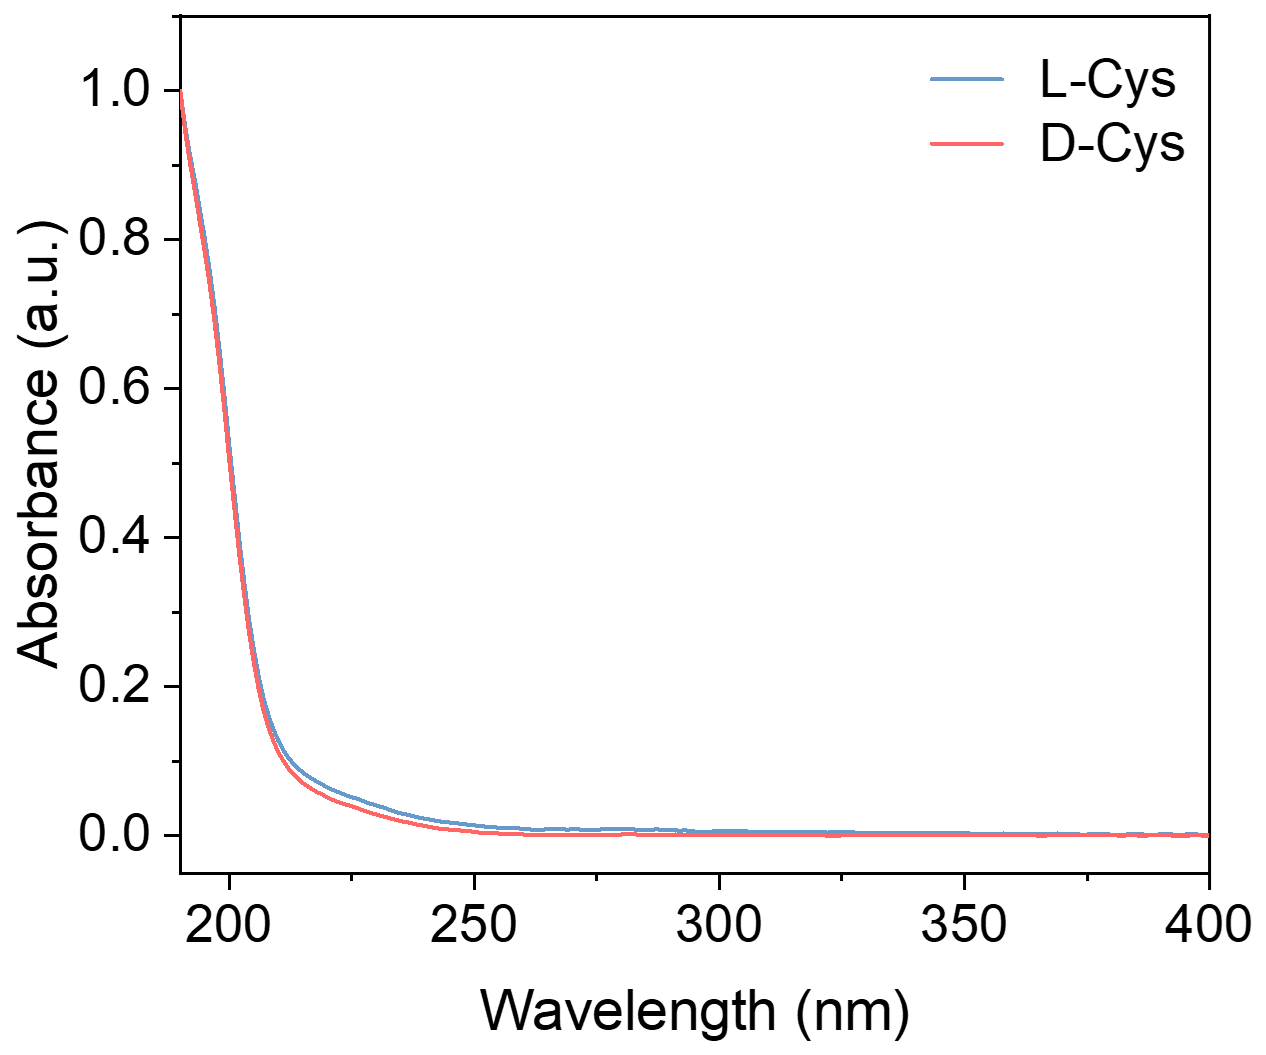


**Supplementary Figure 13.** UV-vis spectra of antipodal Cys aqueous solution.


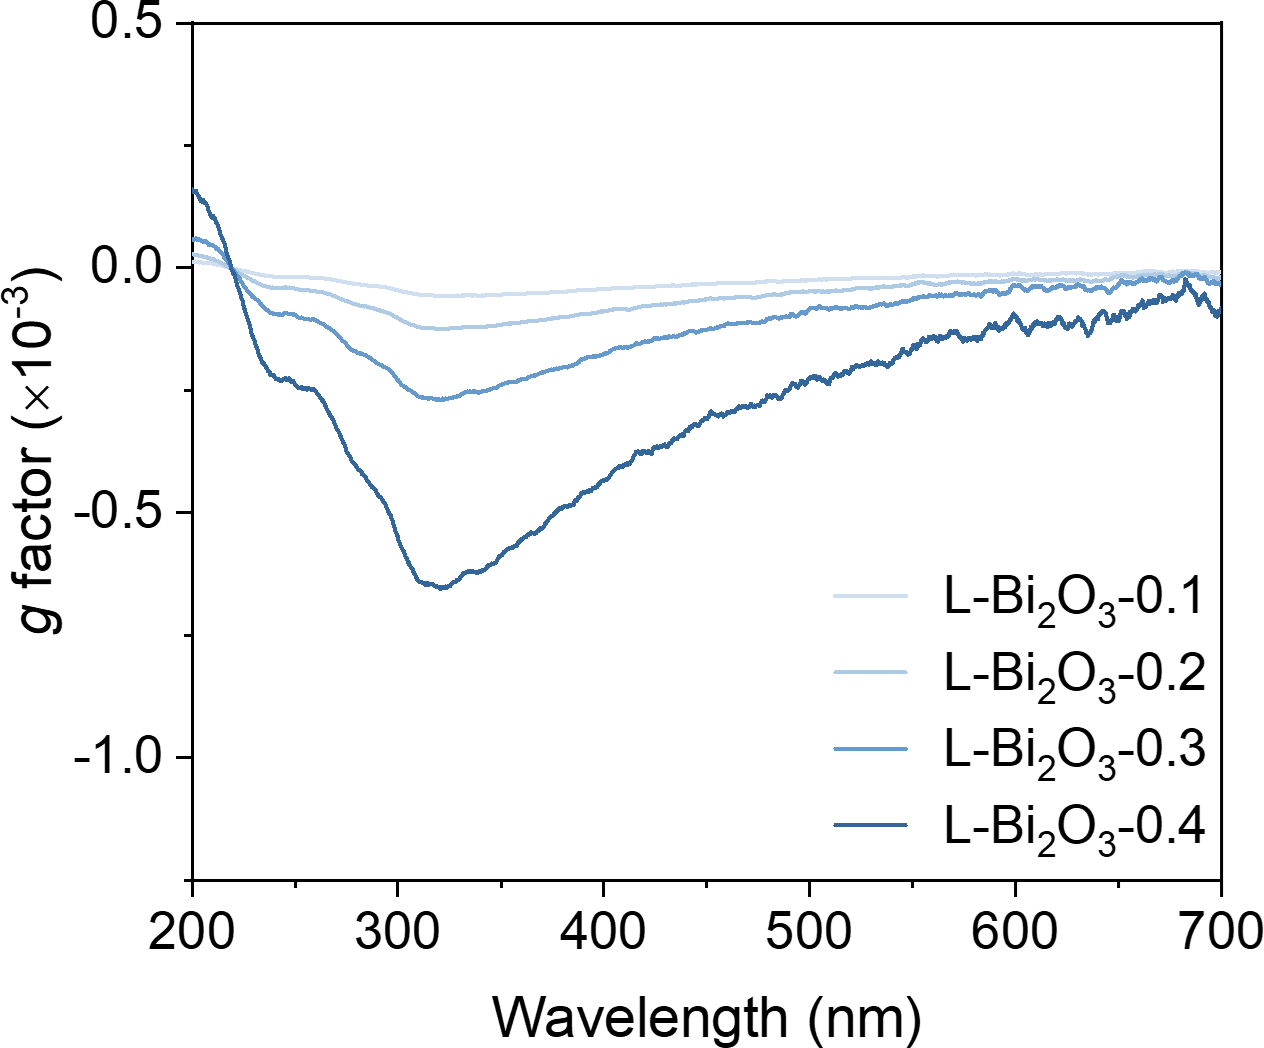


**Supplementary Figure 14.** *g* factor spectra of L-Bi2O3 with different L-Cys/Bi ratios from 0.1 to 0.4.


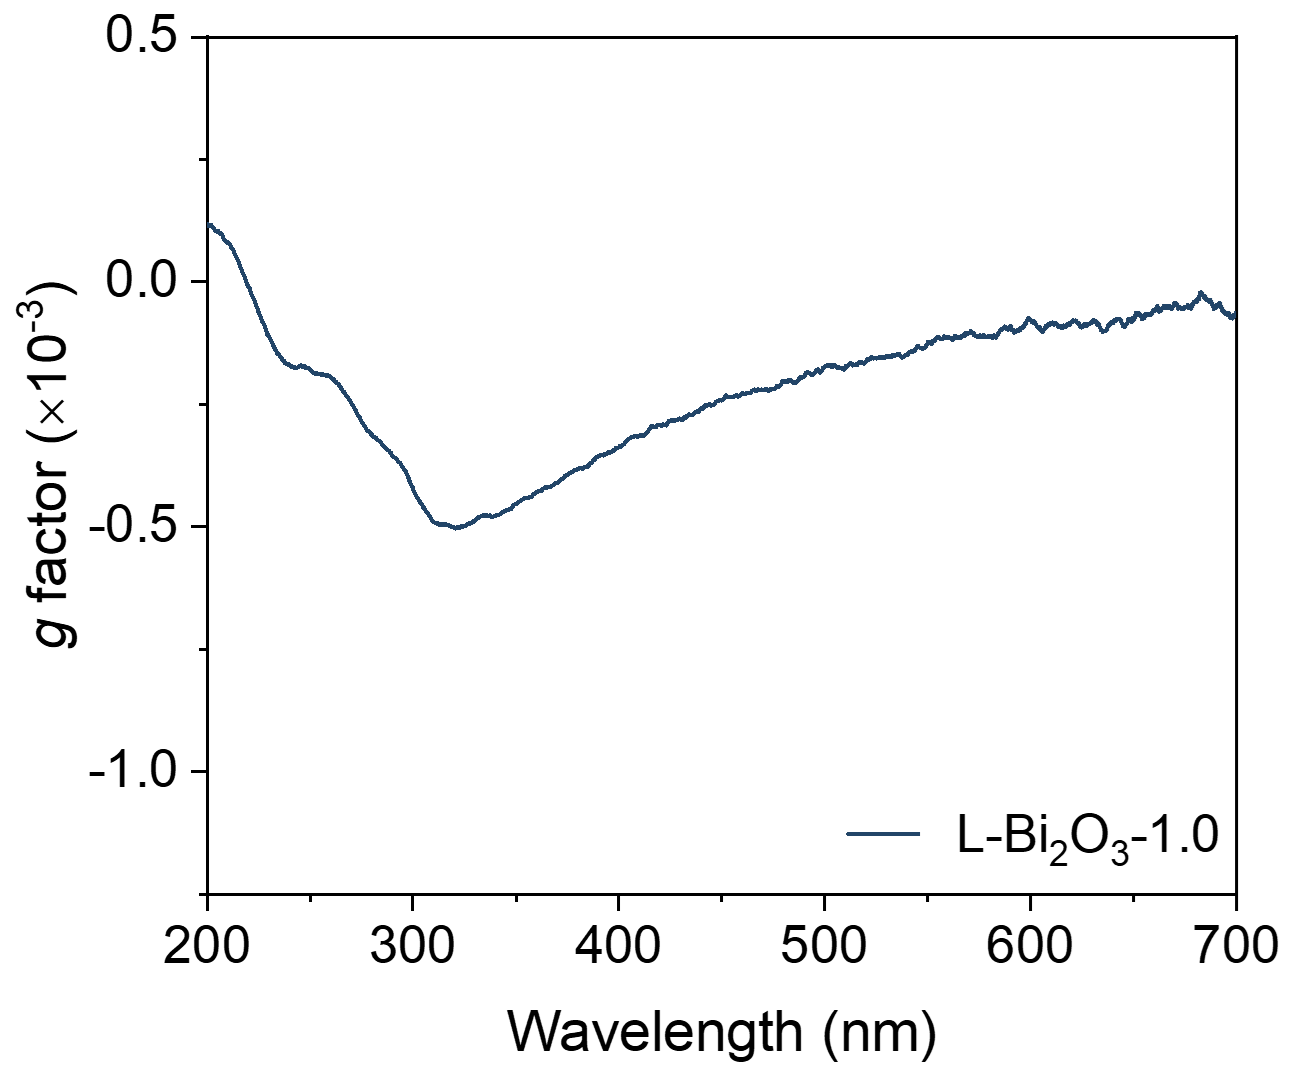


**Supplementary Figure 15.** *g* factor spectra of L-Bi2O3 with the ratio of L-Cys/Bi (1:1).


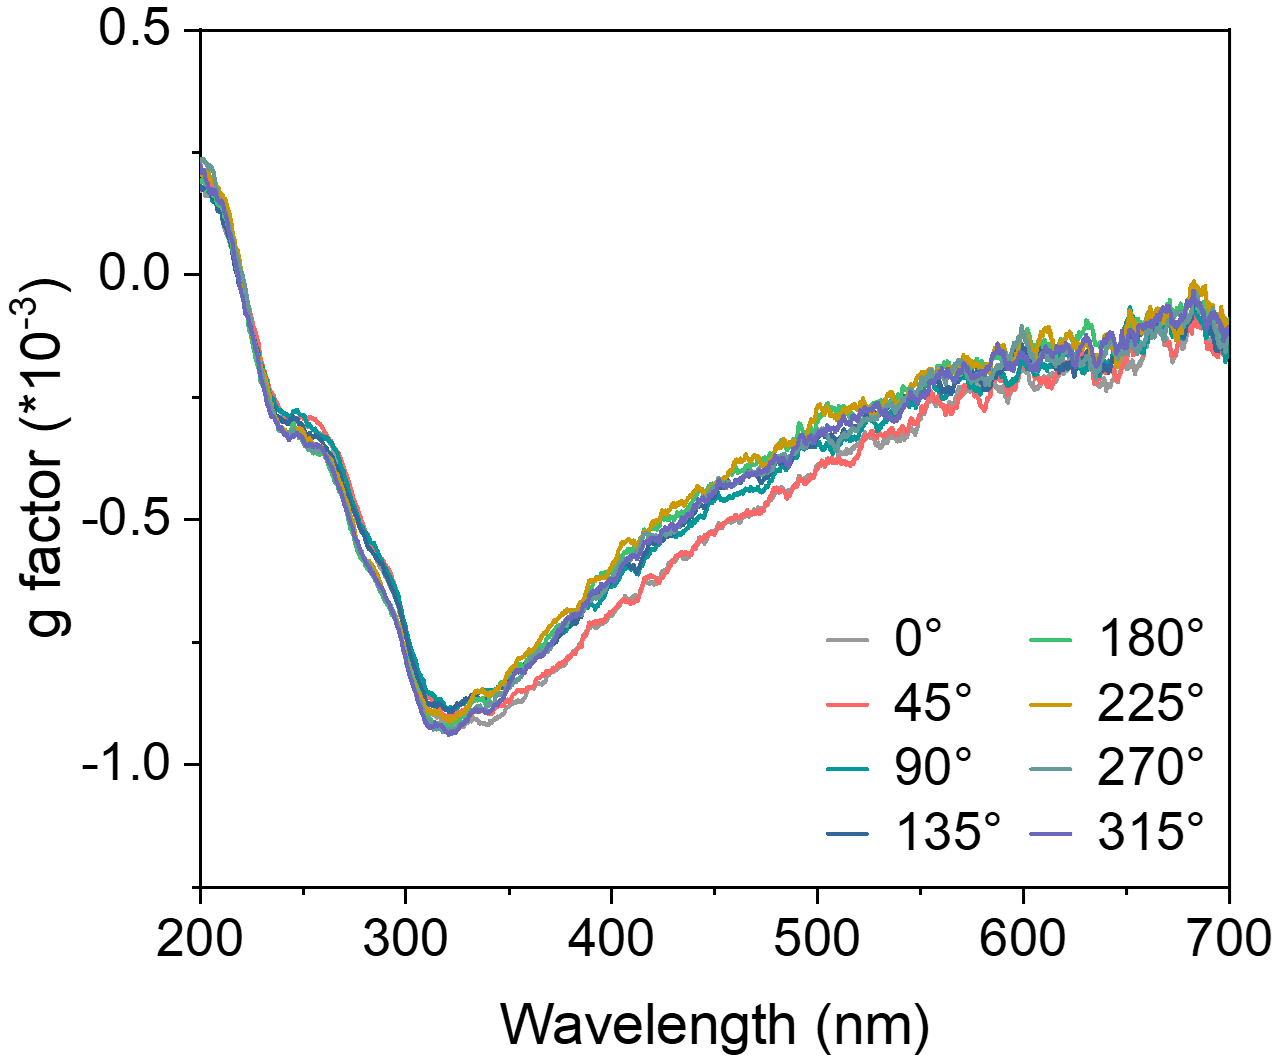


**Supplementary Figure 16.** CD spectra of L-Bi2O3 with rotation measurement. The substrate is rotated along the propagation direction of incident light with 360°, with each rotation angle of 45°.


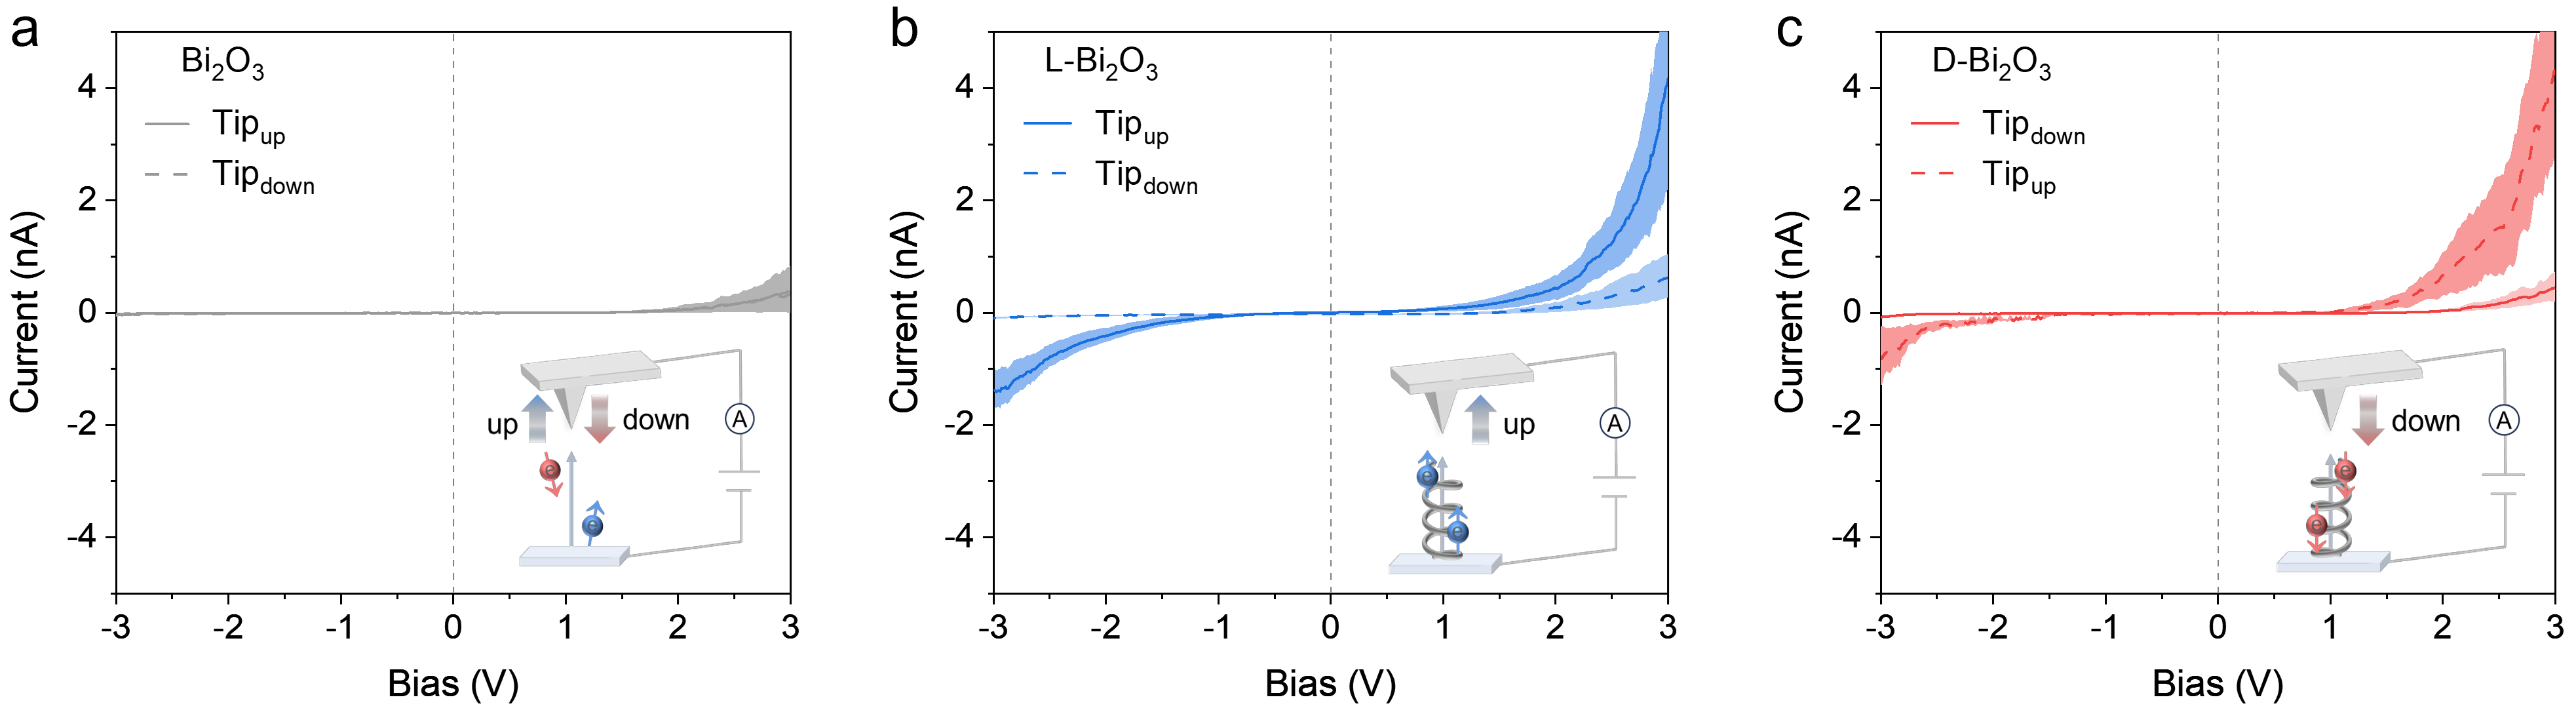


**Supplementary Figure 17.** Averaged I−V curves from mc-AFM measurements on Bi2O3, L-Bi2O3, and D-Bi2O3. Schematic illustration is the chirality dependence on out-of-plane charge transport. The tip is magnetized in up (blue), and down (red) directions, respectively. The I-V response for each sample was averaged over 50 scans, and the shaded region around the lines marks the 95% confidence limits for the average results.


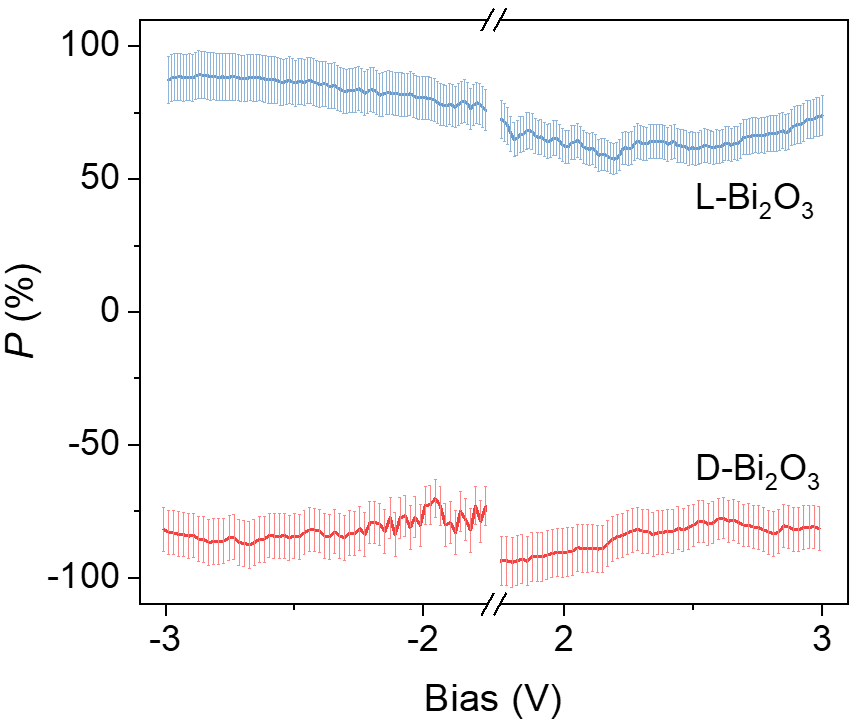


**Supplementary Figure 18.** Spin polarization versus bias voltage curves of L- and D-Bi2O3. As both the IUP and IDOWN were almost zero in the bias voltage of -1.5~1.5 V, spin polarization could not be reliably determined. The curves in this range were substituted with the symbol //.

The degree of spin polarization P is the physical quantity evaluating spin polarization:

Where IUP and IDOWN represent the currents measured at the tip magnetized in the UP and DOWN direction, respectively. The degree of spin polarization of L- and D-Bi2O3, calculated from I–V curves, is +80% ± 4.5% and -81% ± 4.8% at 3 V, respectively.


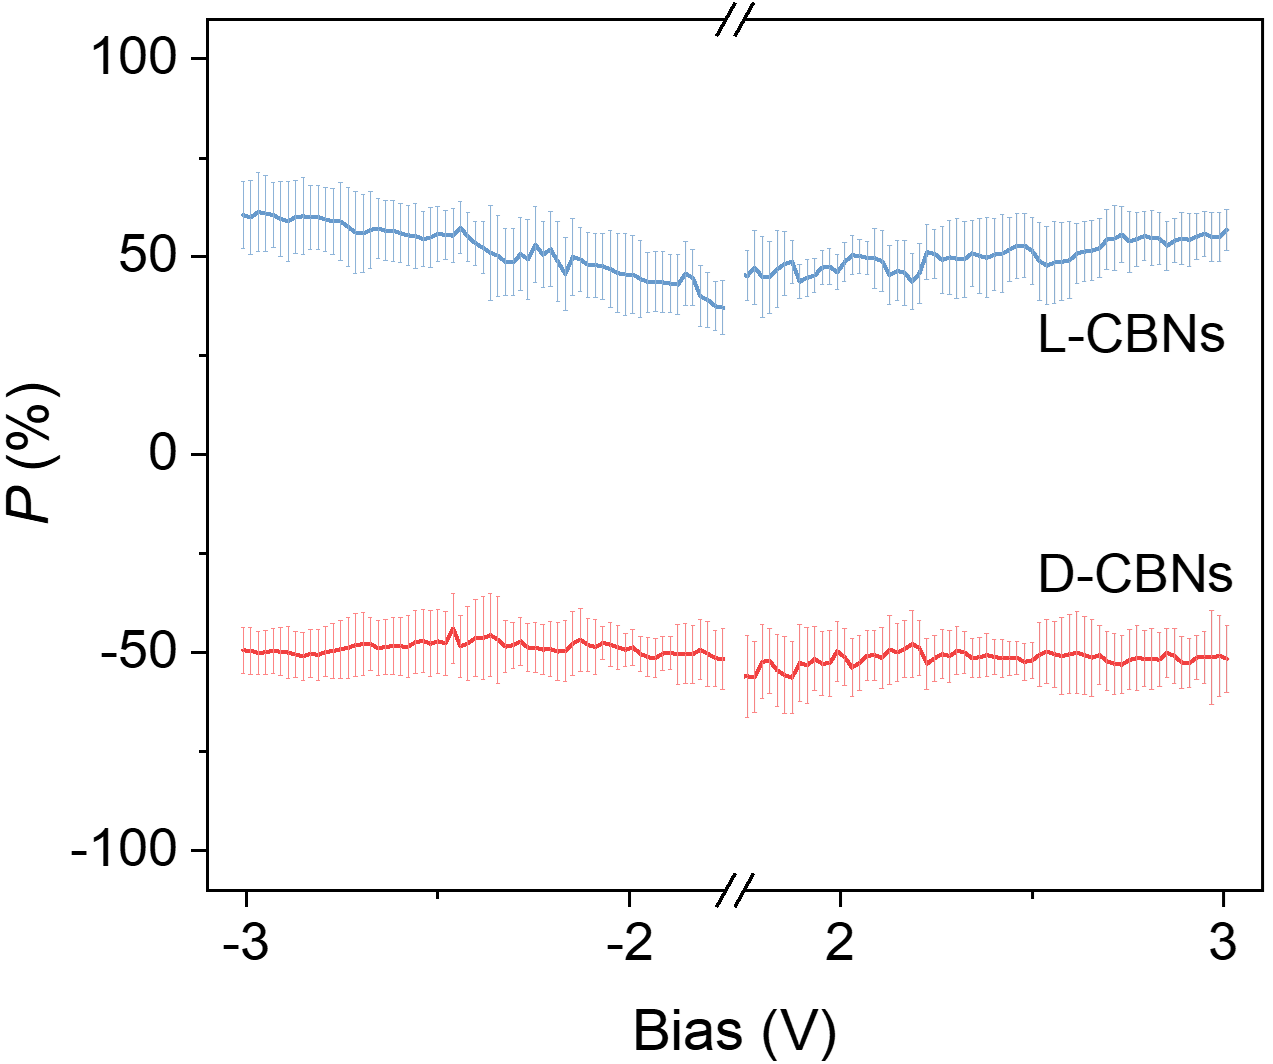


**Supplementary Figure 19.** Spin polarization versus bias voltage curves of L- and D-CBNs. The degree of spin polarization of L- and D-CBNs, calculated from I–V curves, is +56% ± 5.1% and -51% ± 6.3% at 3 V, respectively.


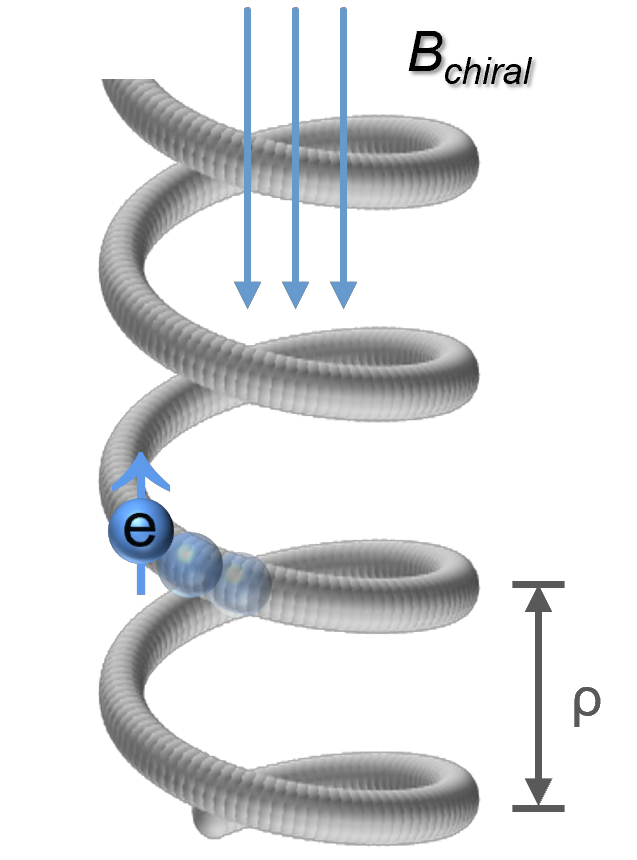


**Supplementary Figure 20.** Chiral-induced spin selectivity. A schematic description of the electron transmission through a chiral potential of pitch *p*. The electron is depicted as a sphere, and the arrow indicates its spin. The electron moves within the potential, while a constant force, which is like the classical centripetal force (***F***centripetal), acts on it in the direction perpendicular to its velocity. This force is like a Lorentz force ***F*** that results from a magnetic field, ***B***, applied along the axis of the molecule. The effective spin–orbit coupling is then given by , where is the magnetic moment of the spin1.


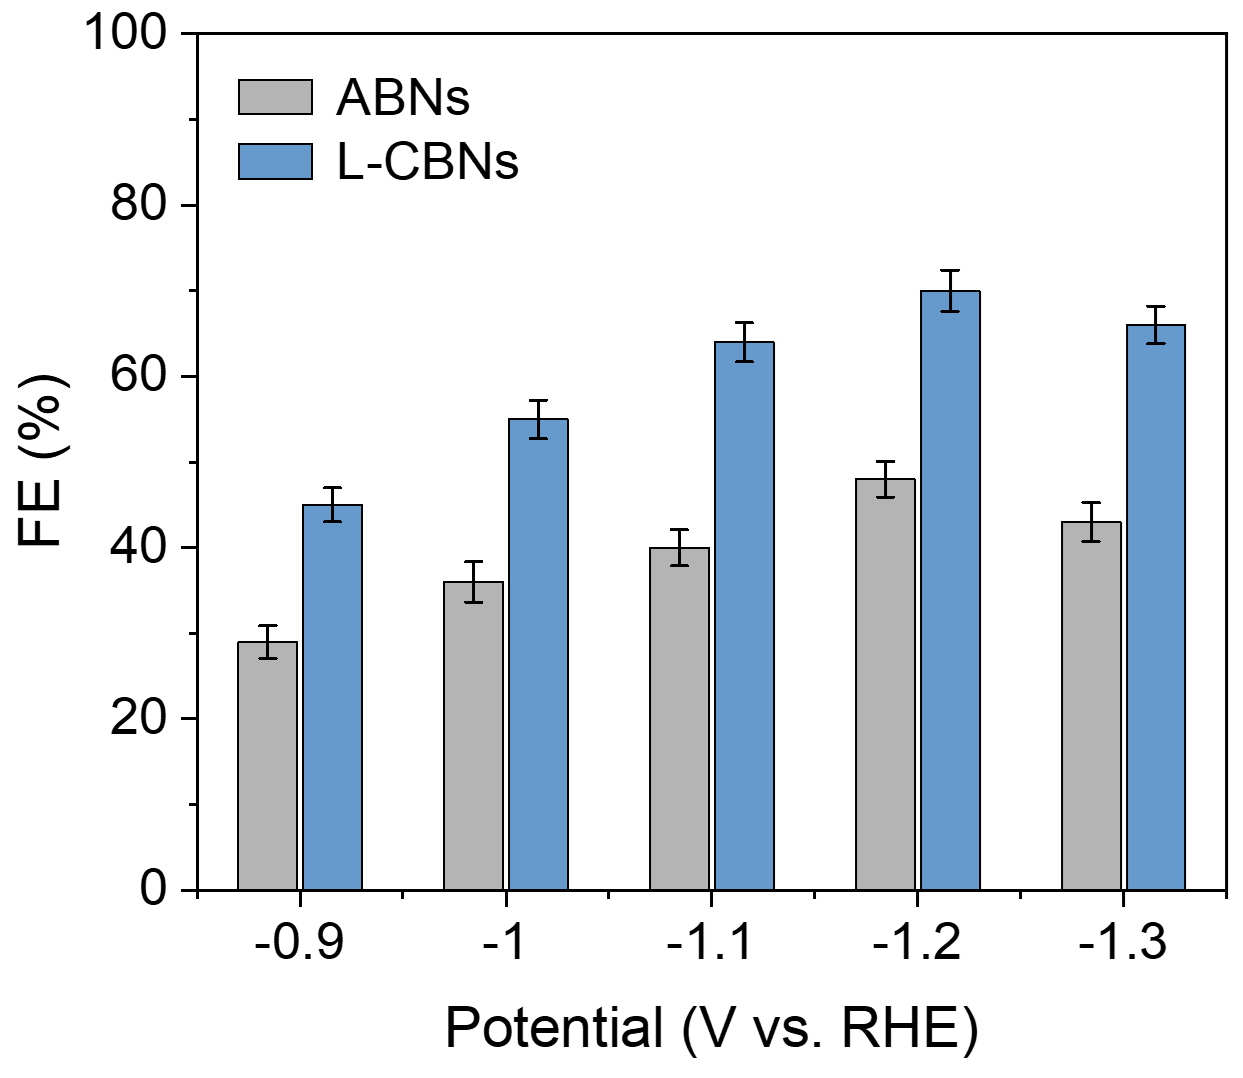


**Supplementary Figure 21.** Potential-dependent FE for NH2OH formation on ABNs and L-CBNs in 0.5 M H2SO4 and 0.5 M KNO3. Measurements were taken at least three times, and the average FE is presented with the standard deviation as error bars.


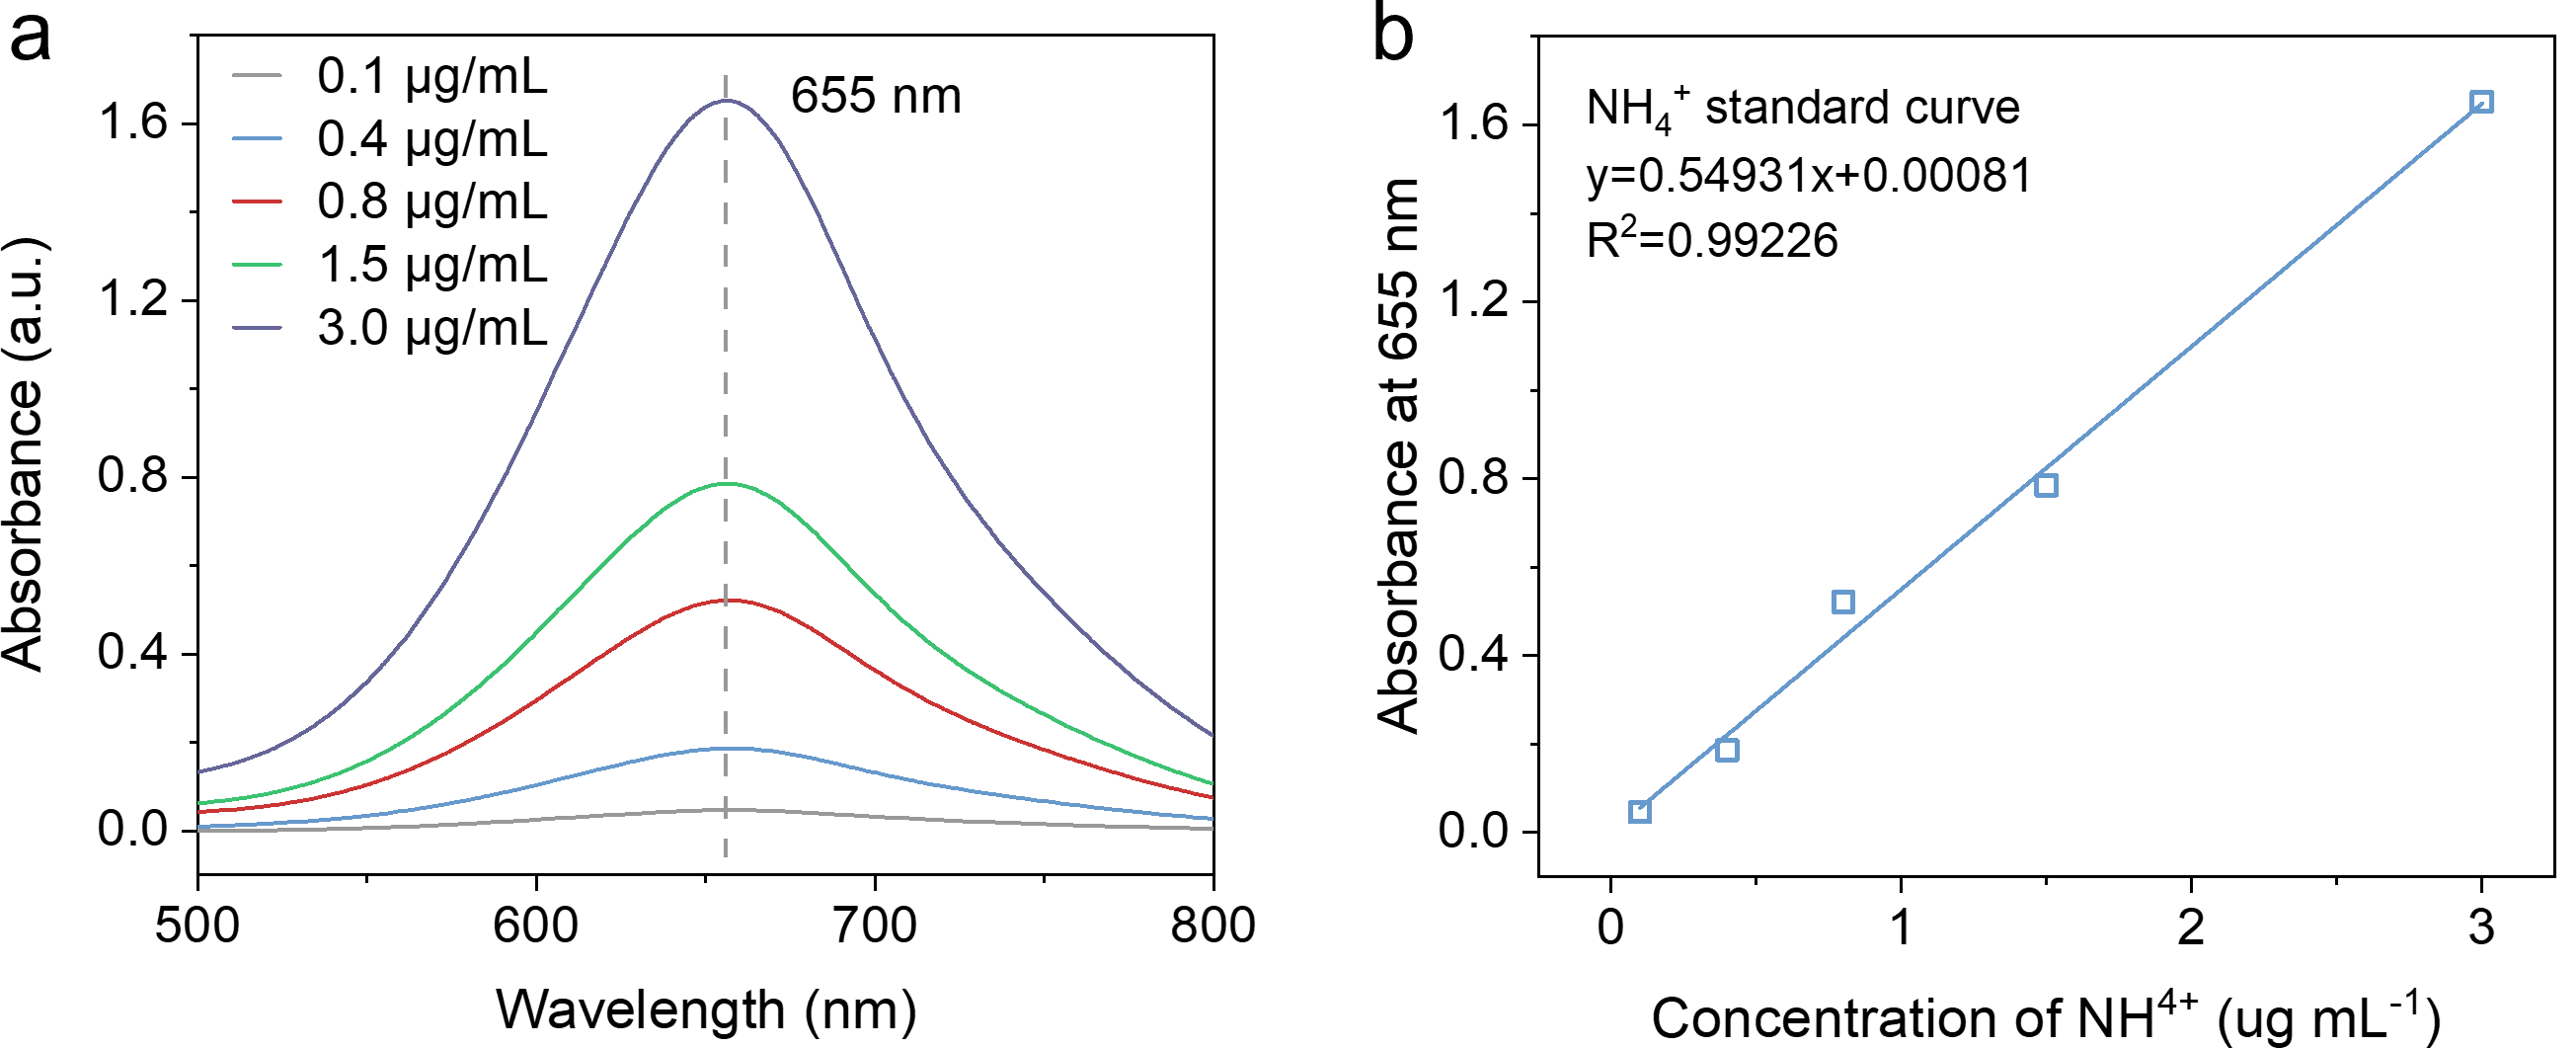


**Supplementary Figure 22.** (a) UV-Vis spectroscopy curves of NH4+ solutions with different known concentrations (0.1, 0.4, 0.8, 1.5, 3 μg mL-1). The absorbance at 655 nm is referred to the concentration of NH4+. (b) Corresponding linear calibration curve was used to quantify the NH4+ yield.


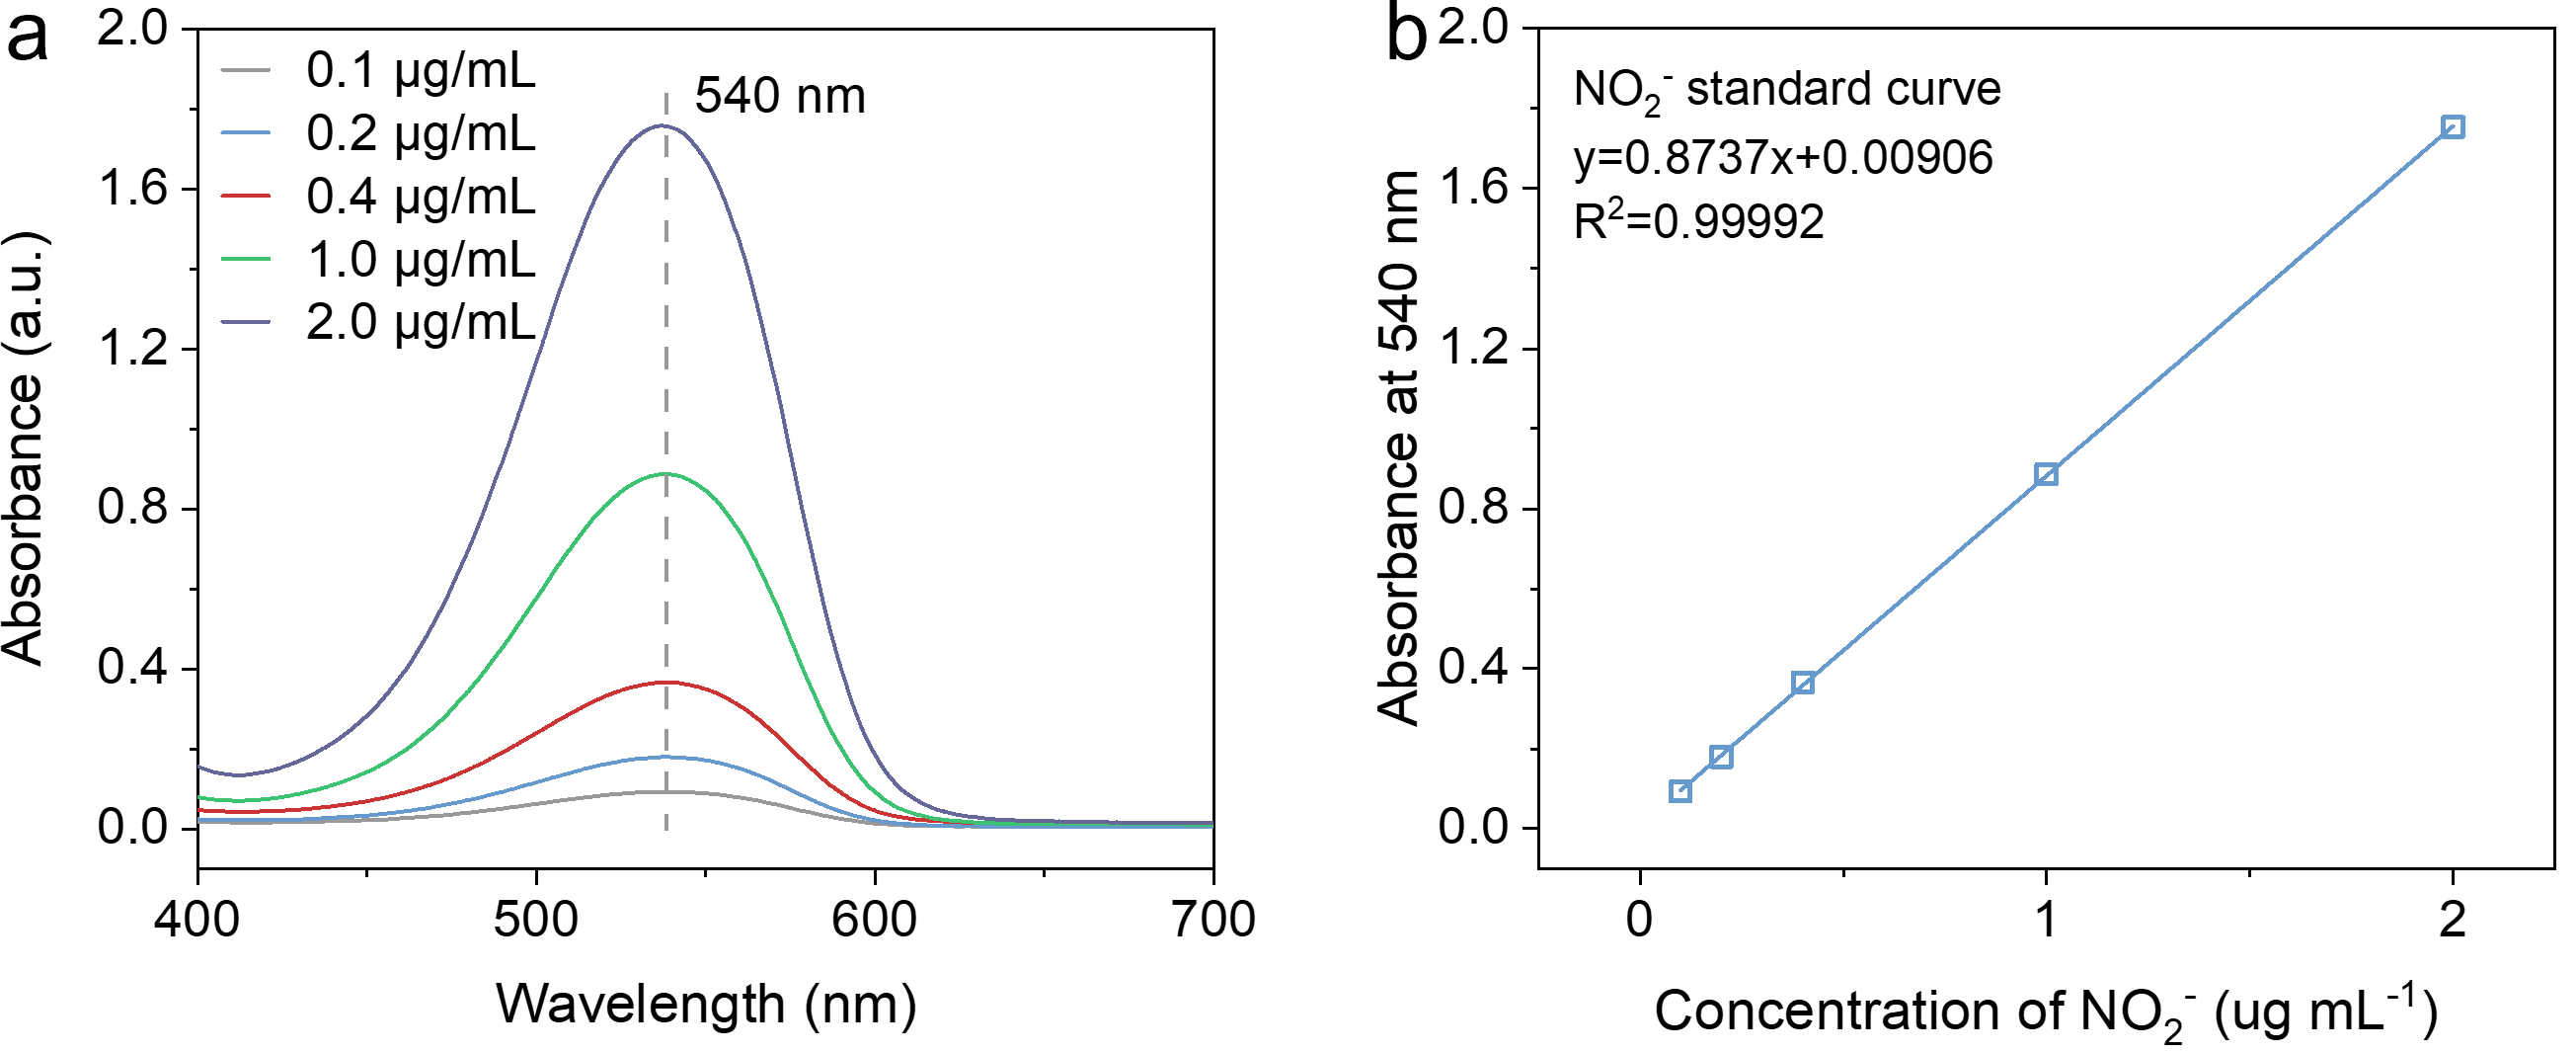


**Supplementary Figure 23.** (a) UV-Vis spectroscopy curves of NO2- solutions with different known concentrations (0.1, 0.2, 0.4, 1.0, and 2.0 μg mL-1). The absorbance at 540 nm is referred to the concentration of NO2-. (b) Corresponding linear calibration curve was used to quantify the NO2- yield.


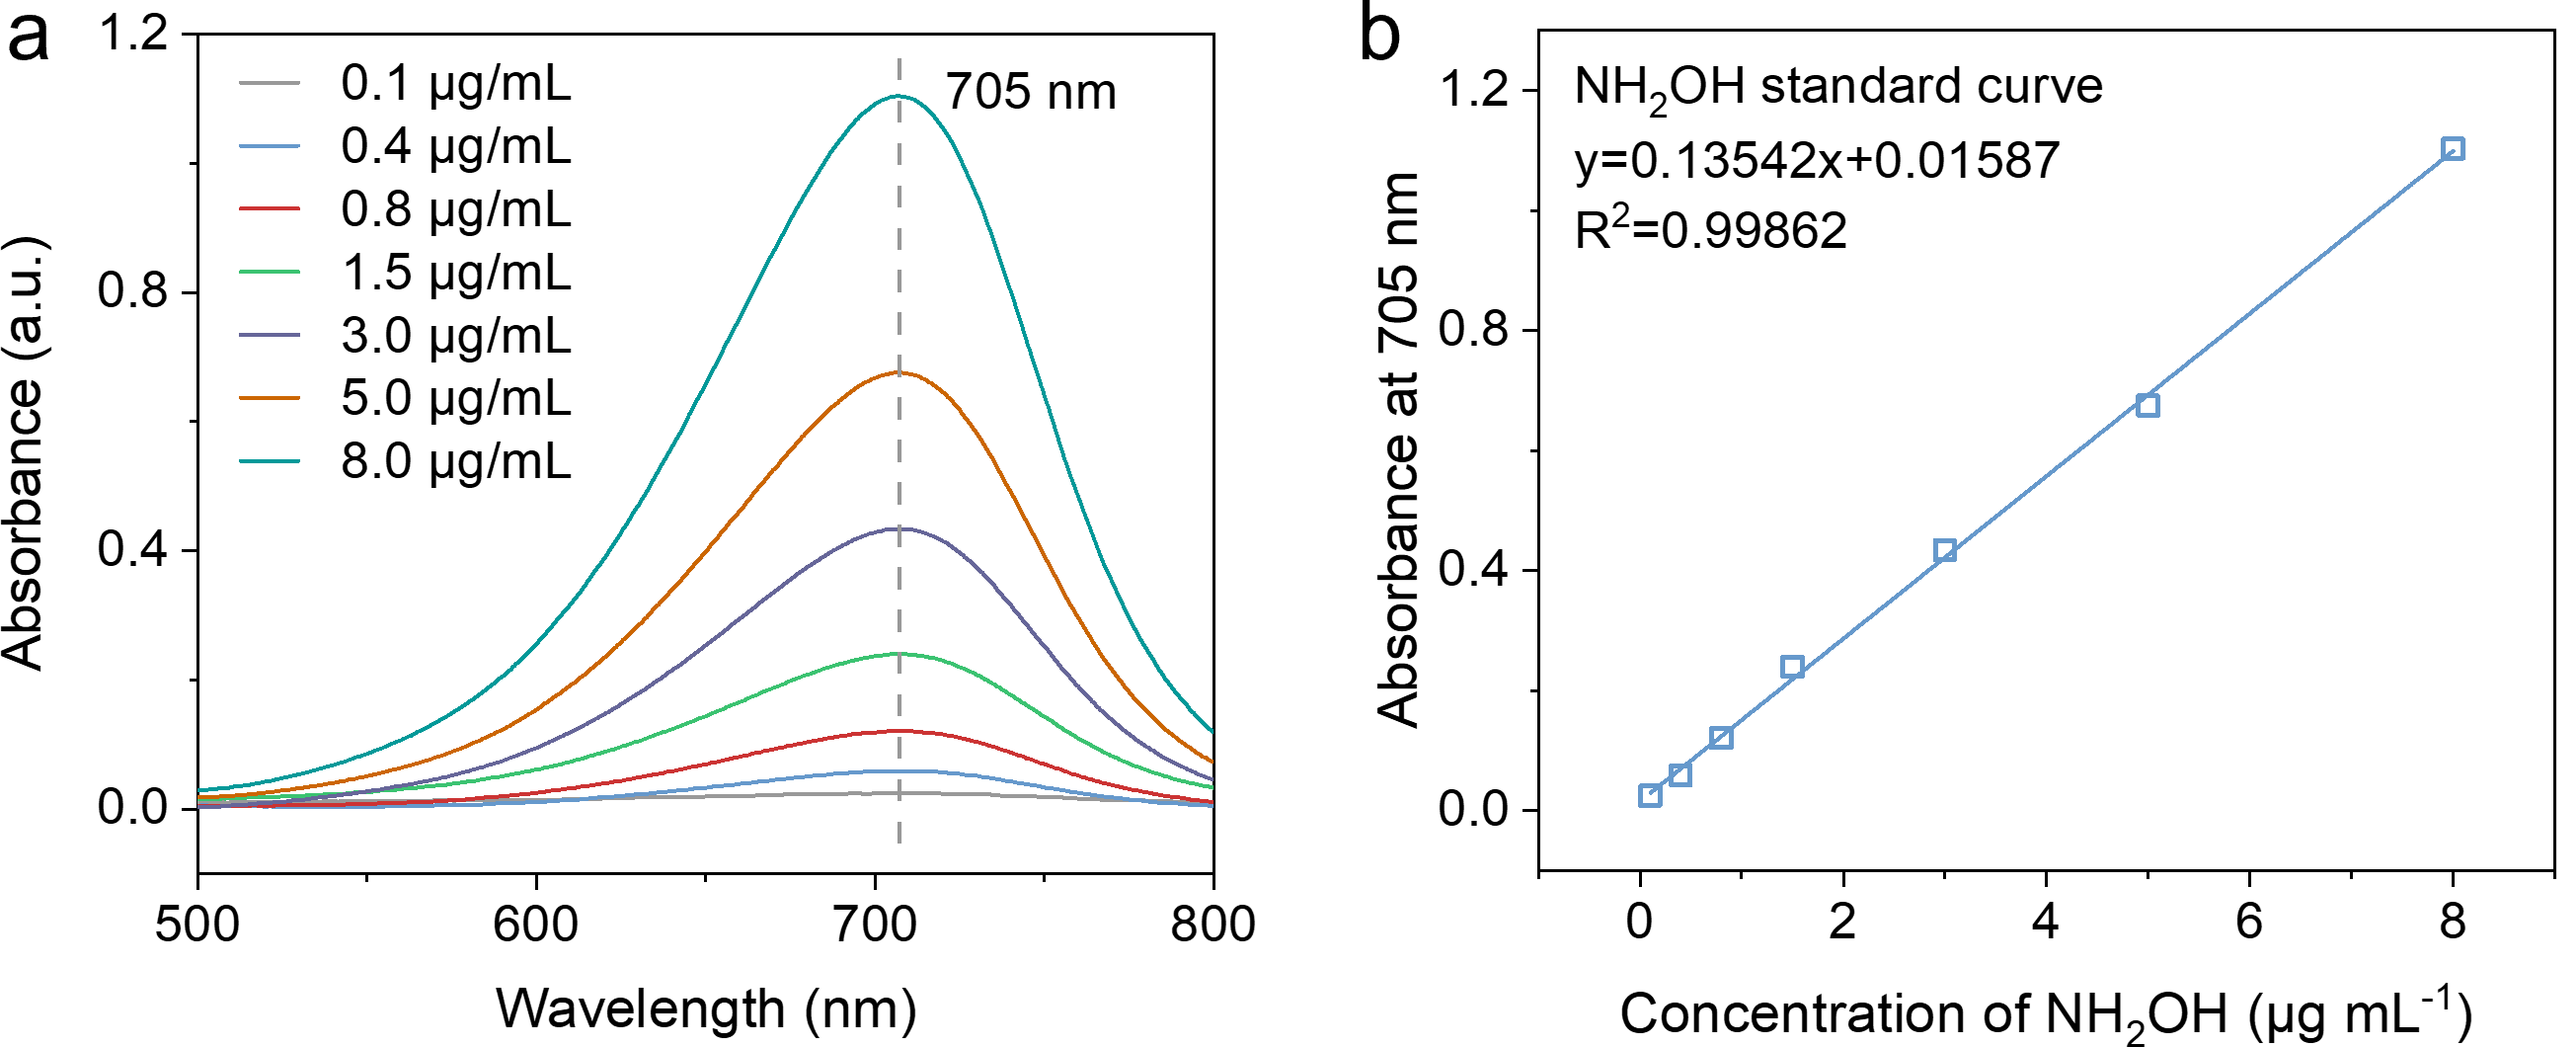


**Supplementary Figure 24.** (a) UV-Vis spectroscopy curves of NH2OH solutions with different known concentrations (0.1, 0.4, 0.8, 1.5, 3.0, 5.0, and 8 μg mL-1). The absorbance at 705 nm is referred to the concentration of NH2OH. (b) Corresponding linear calibration curve was used to quantify the NH2OH yield.


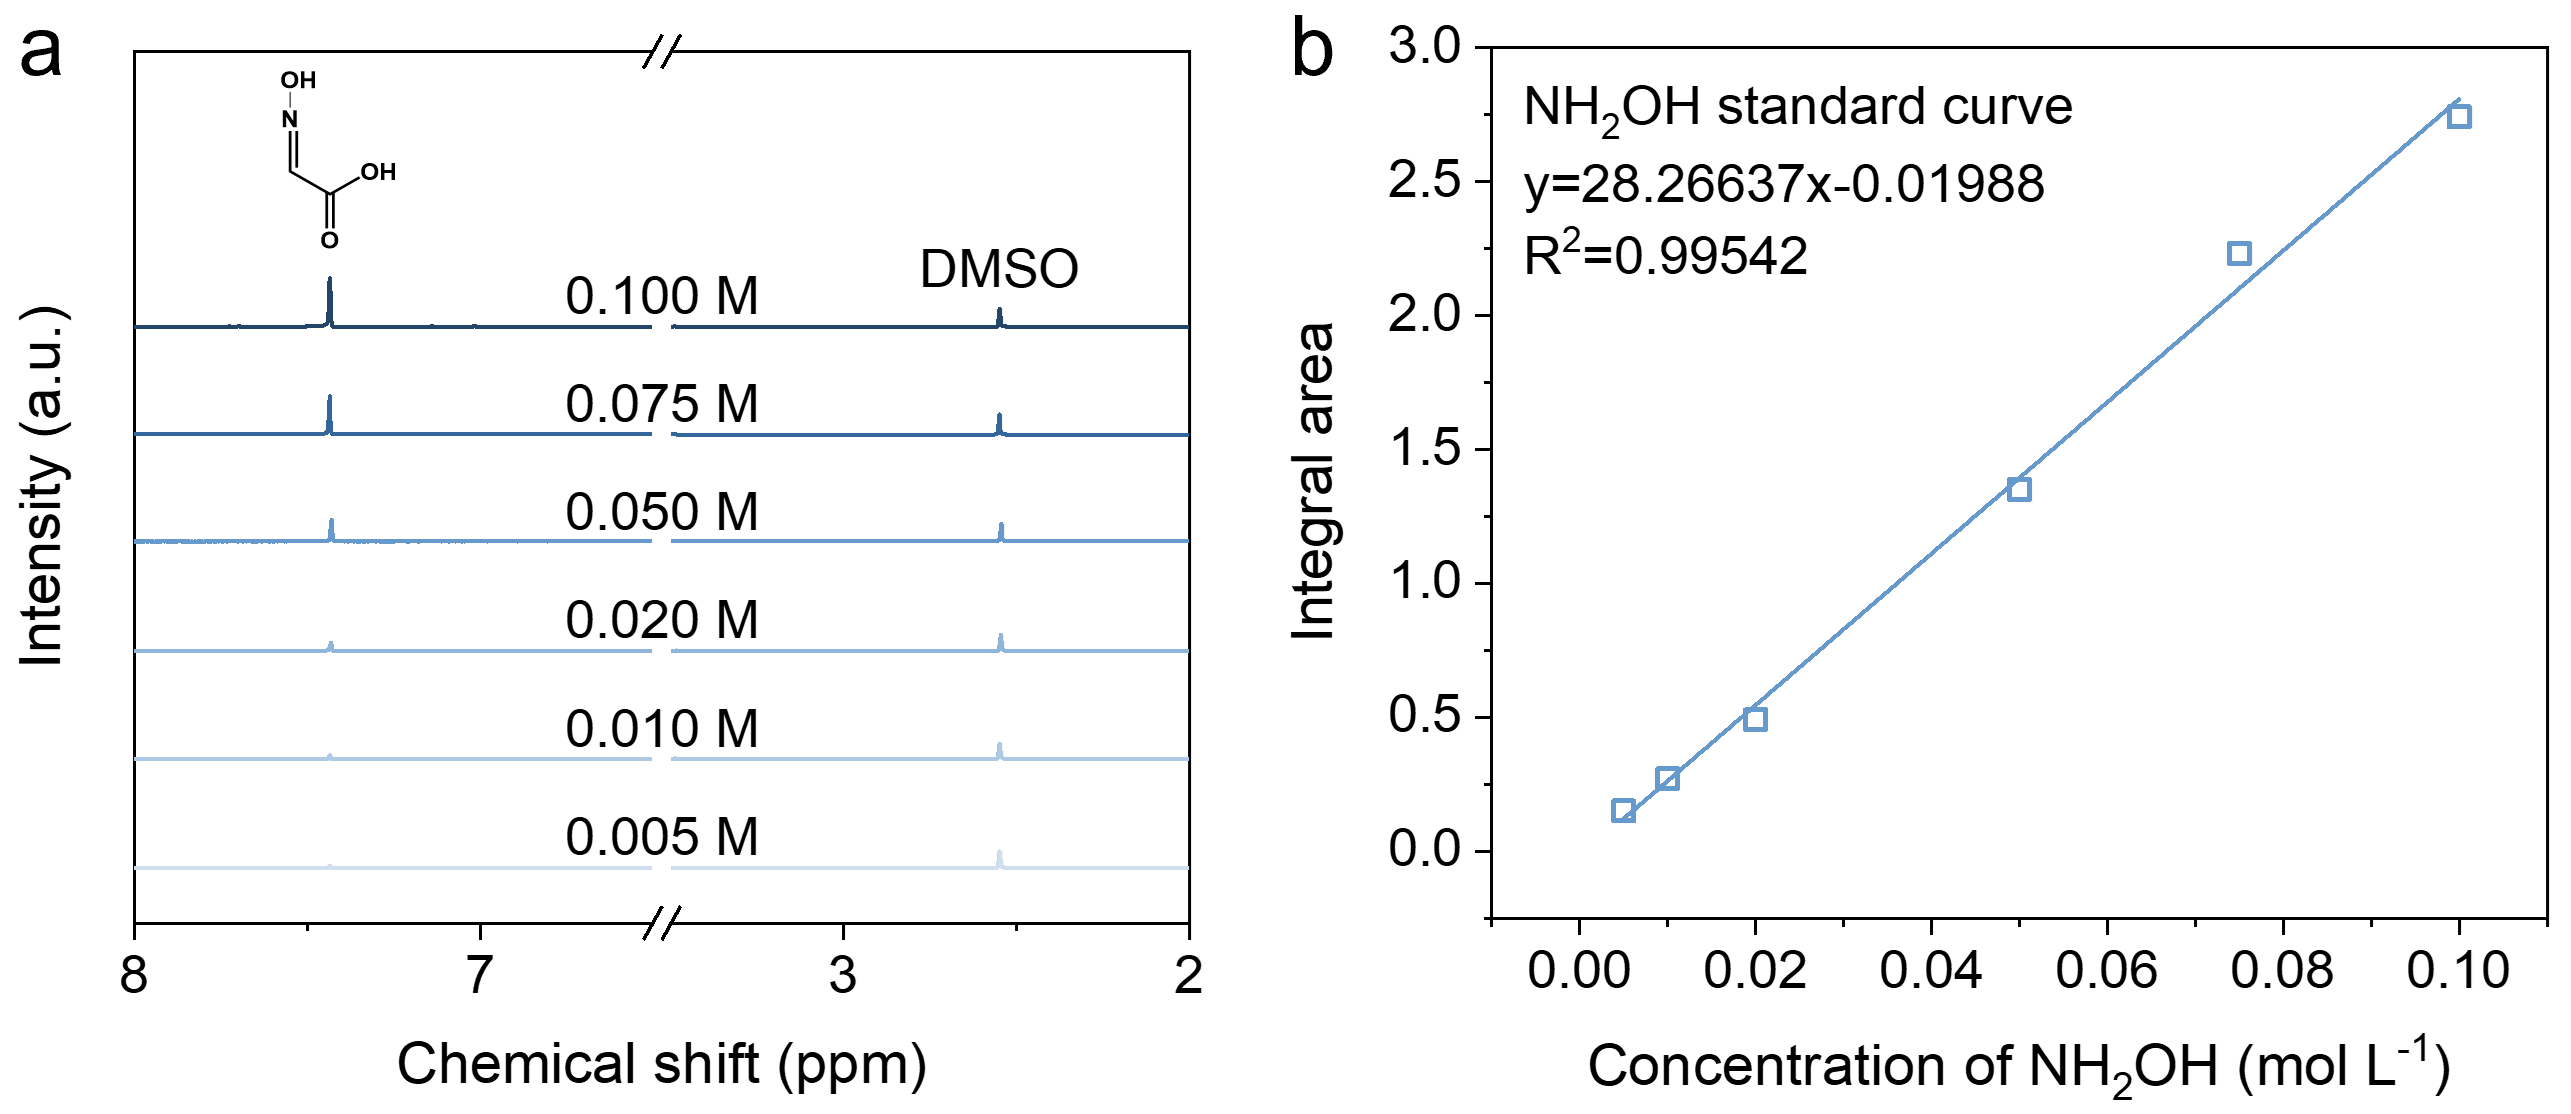


**Supplementary Figure 25.** (a) 1H NMR spectra of standard NH2OH solution with 0.18 M glyoxylic acid. (b) The standard curve of 1H NMR integral area ratio (glyoxylic acid oxime: DMSO-d6) against NH2OH concentrations.


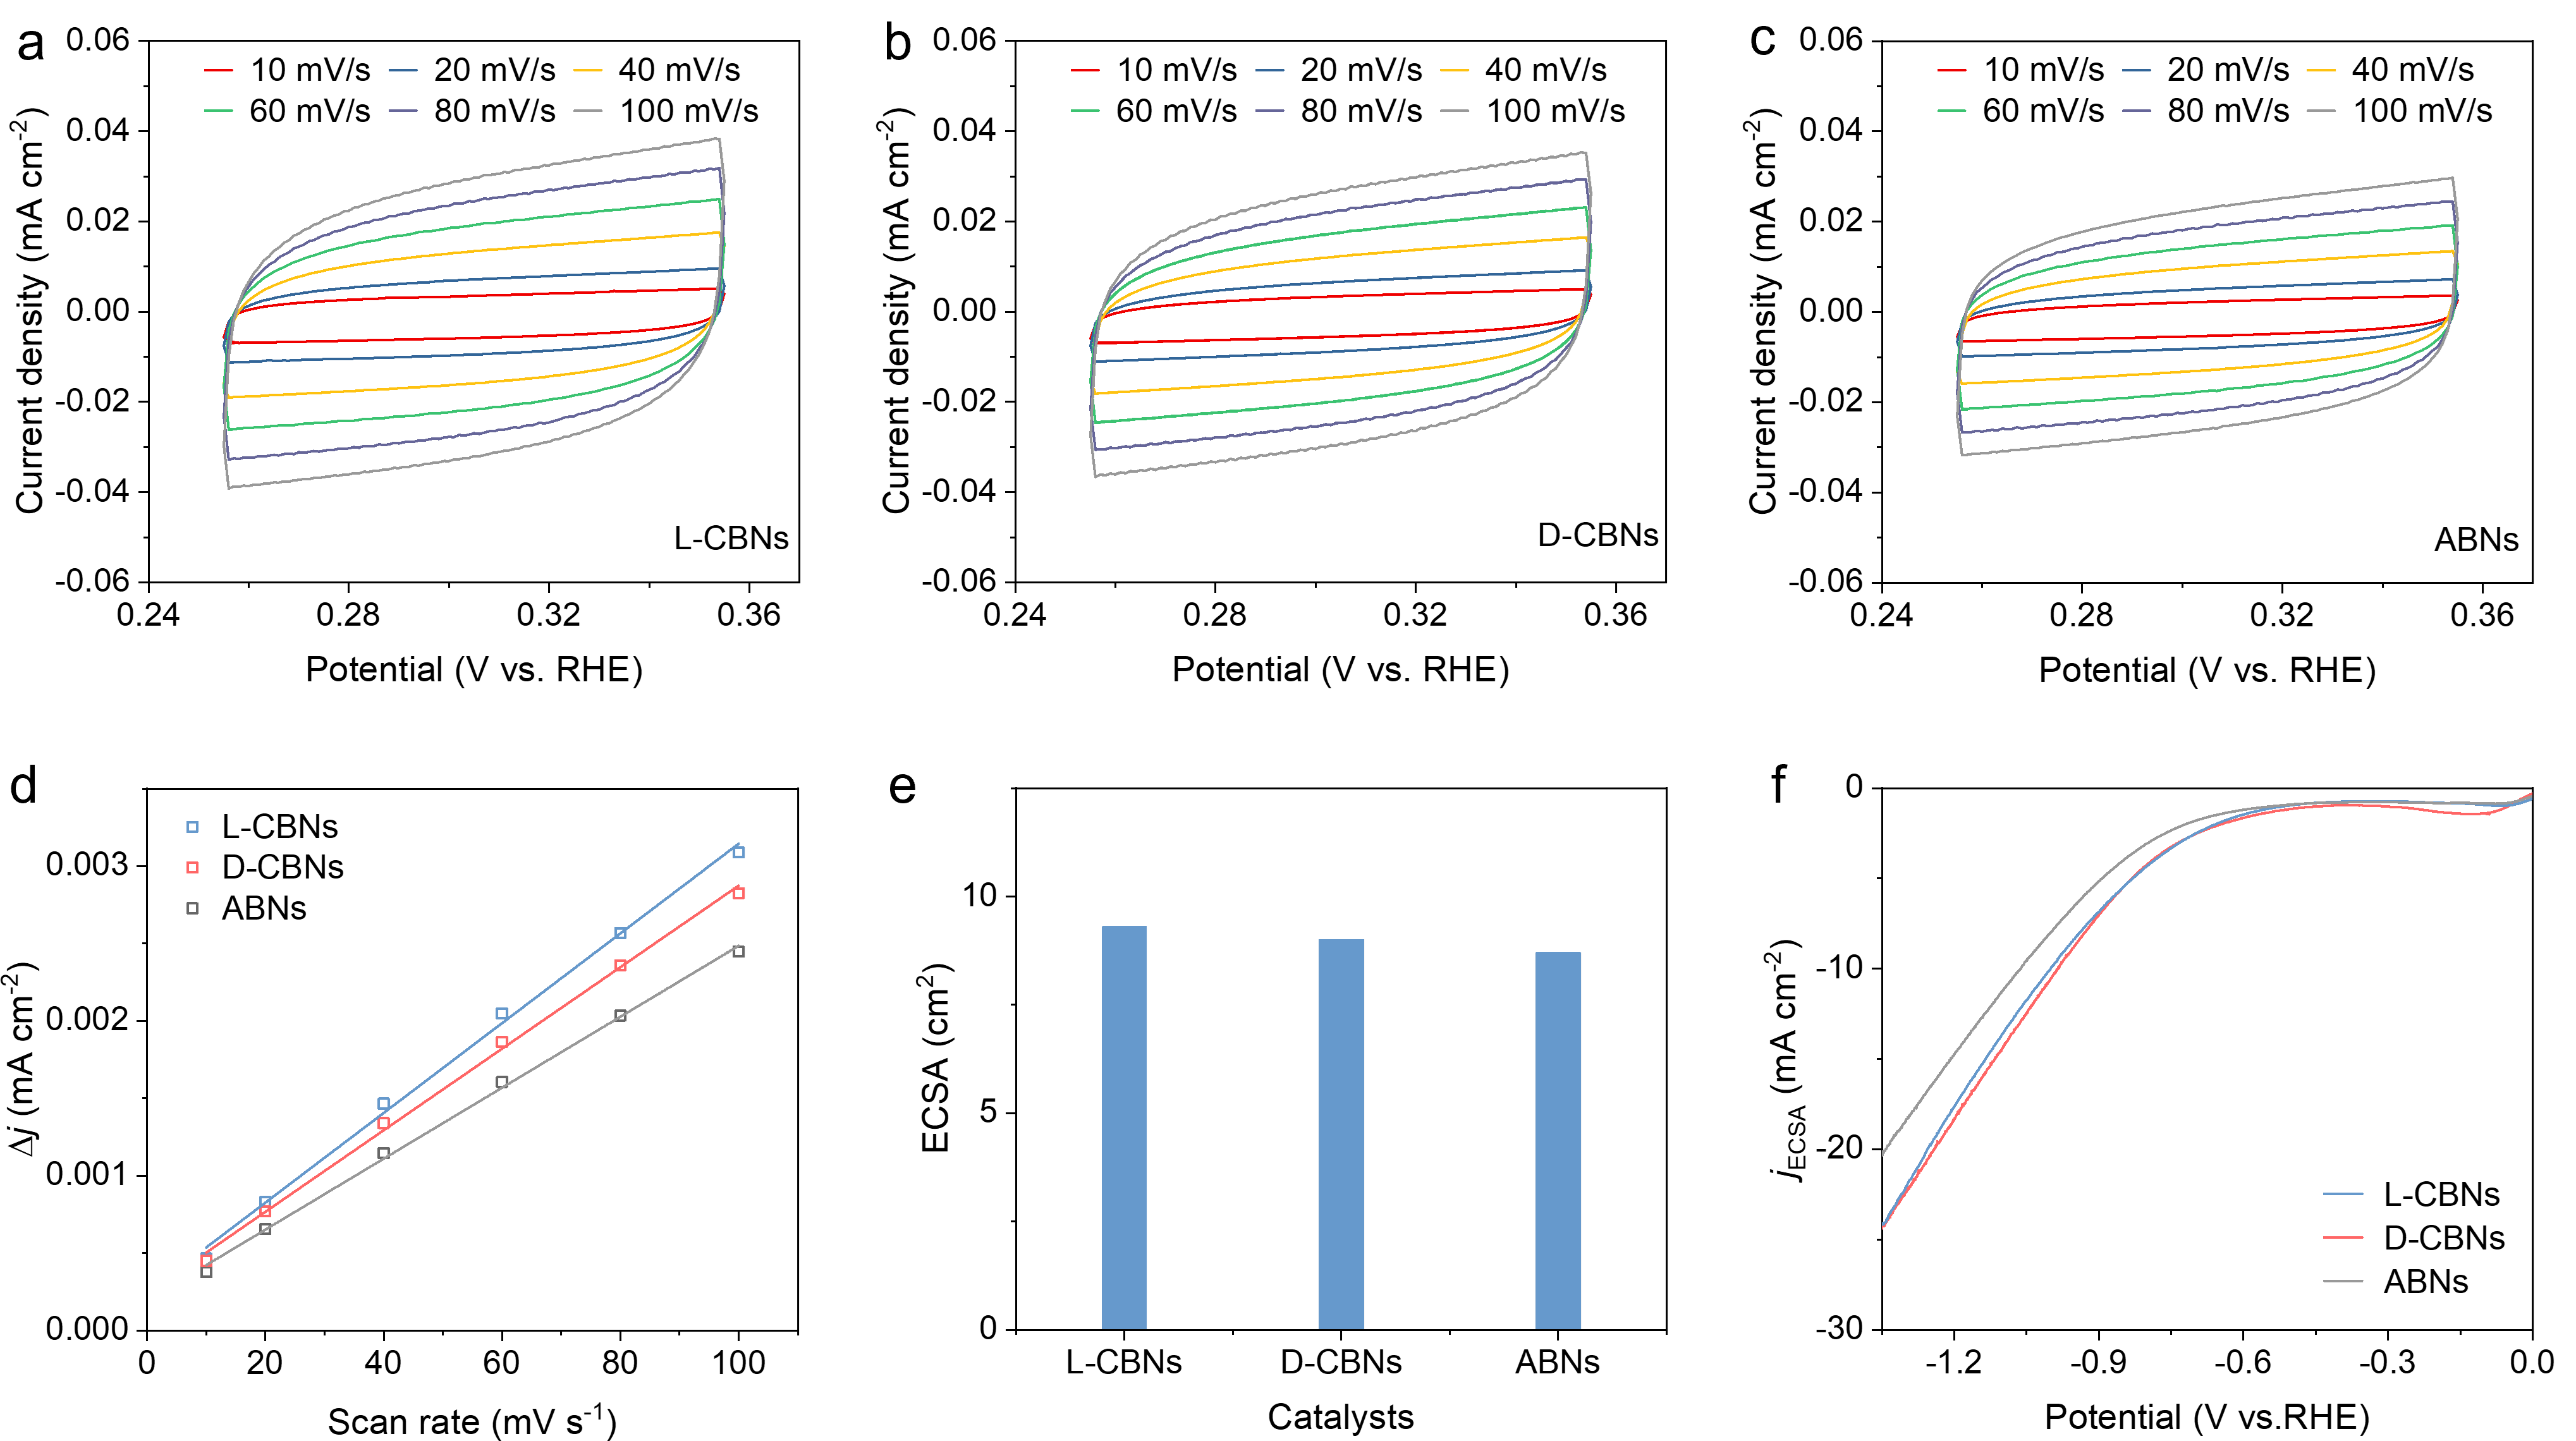


**Supplementary Figure 26.** Electrochemical active surface area (ECSA) measurement. Cyclic voltammetry (CV) curves of (a-c) L-CBNs, D-CBNs, and ABNs electrodes in 0.5 M H2SO4 and 0.5 M KNO3 electrolyte. (d) ECSA plots and electrochemical double-layer capacitance of L-CBNs (0.28 mF cm-2), D-CBNs (0.27 mF cm-2) and ABNs (0.26 mF cm-2) electrodes. (e) The electrochemical active surface area (ECSA). ECSA was calculated using the relation: ECSA = Cdl/CS, where the value of CS is known as 0.030 mF cm−2. L-CBNs (9.3 cm2), D-CBNs (9.0 cm2), and ABNs (8.7 cm2) show similar ECSA due to their similar morphology and micro-structure as well as surface state. (f) ECSA normalized LSV curves of L-CBNs, D-CBNs and ABNs electrodes in 0.5 M H2SO4 and 0.5 M KNO3 electrolyte.


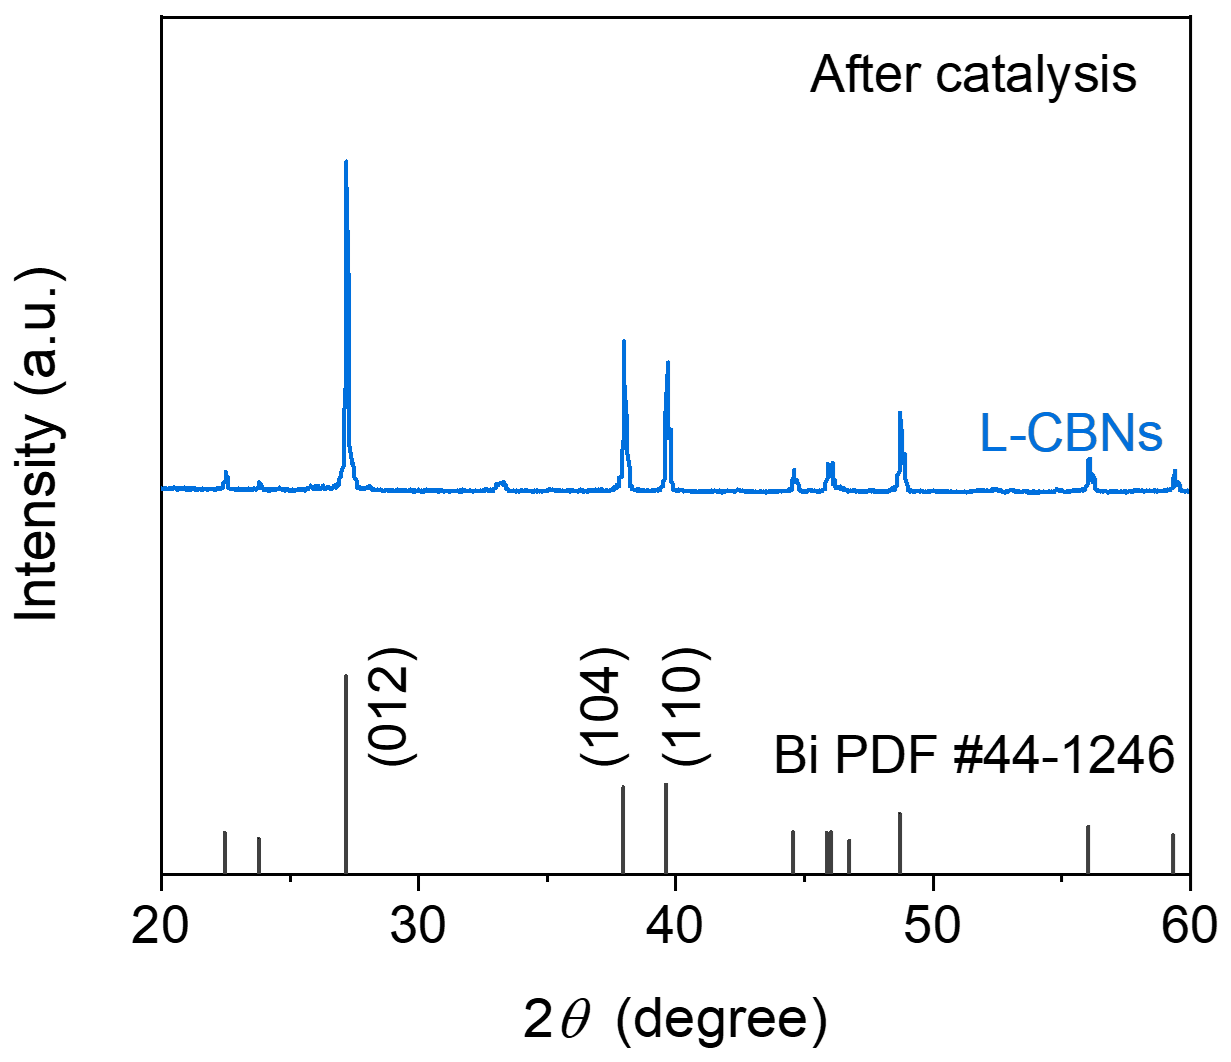


**Supplementary Figure 27.** XRD pattern of L-CBNs after electrocatalytic reaction.


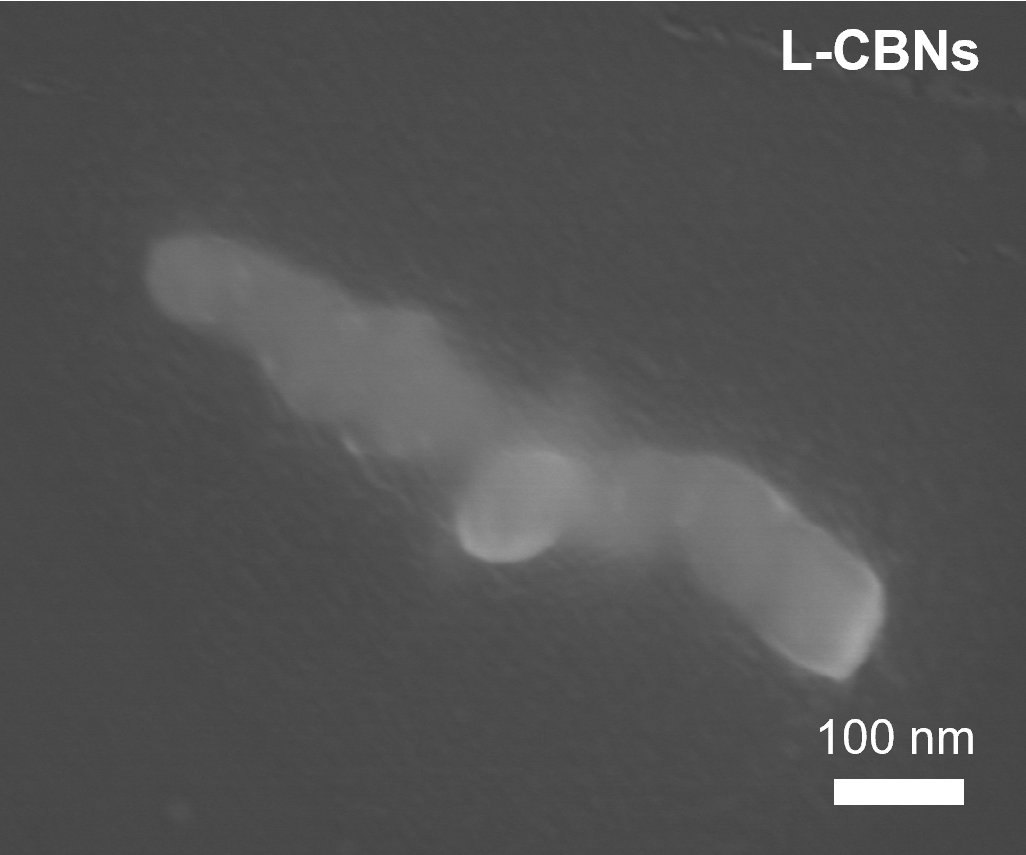


**Supplementary Figure 28.** SEM image of L-CBNs after electrocatalytic reaction.


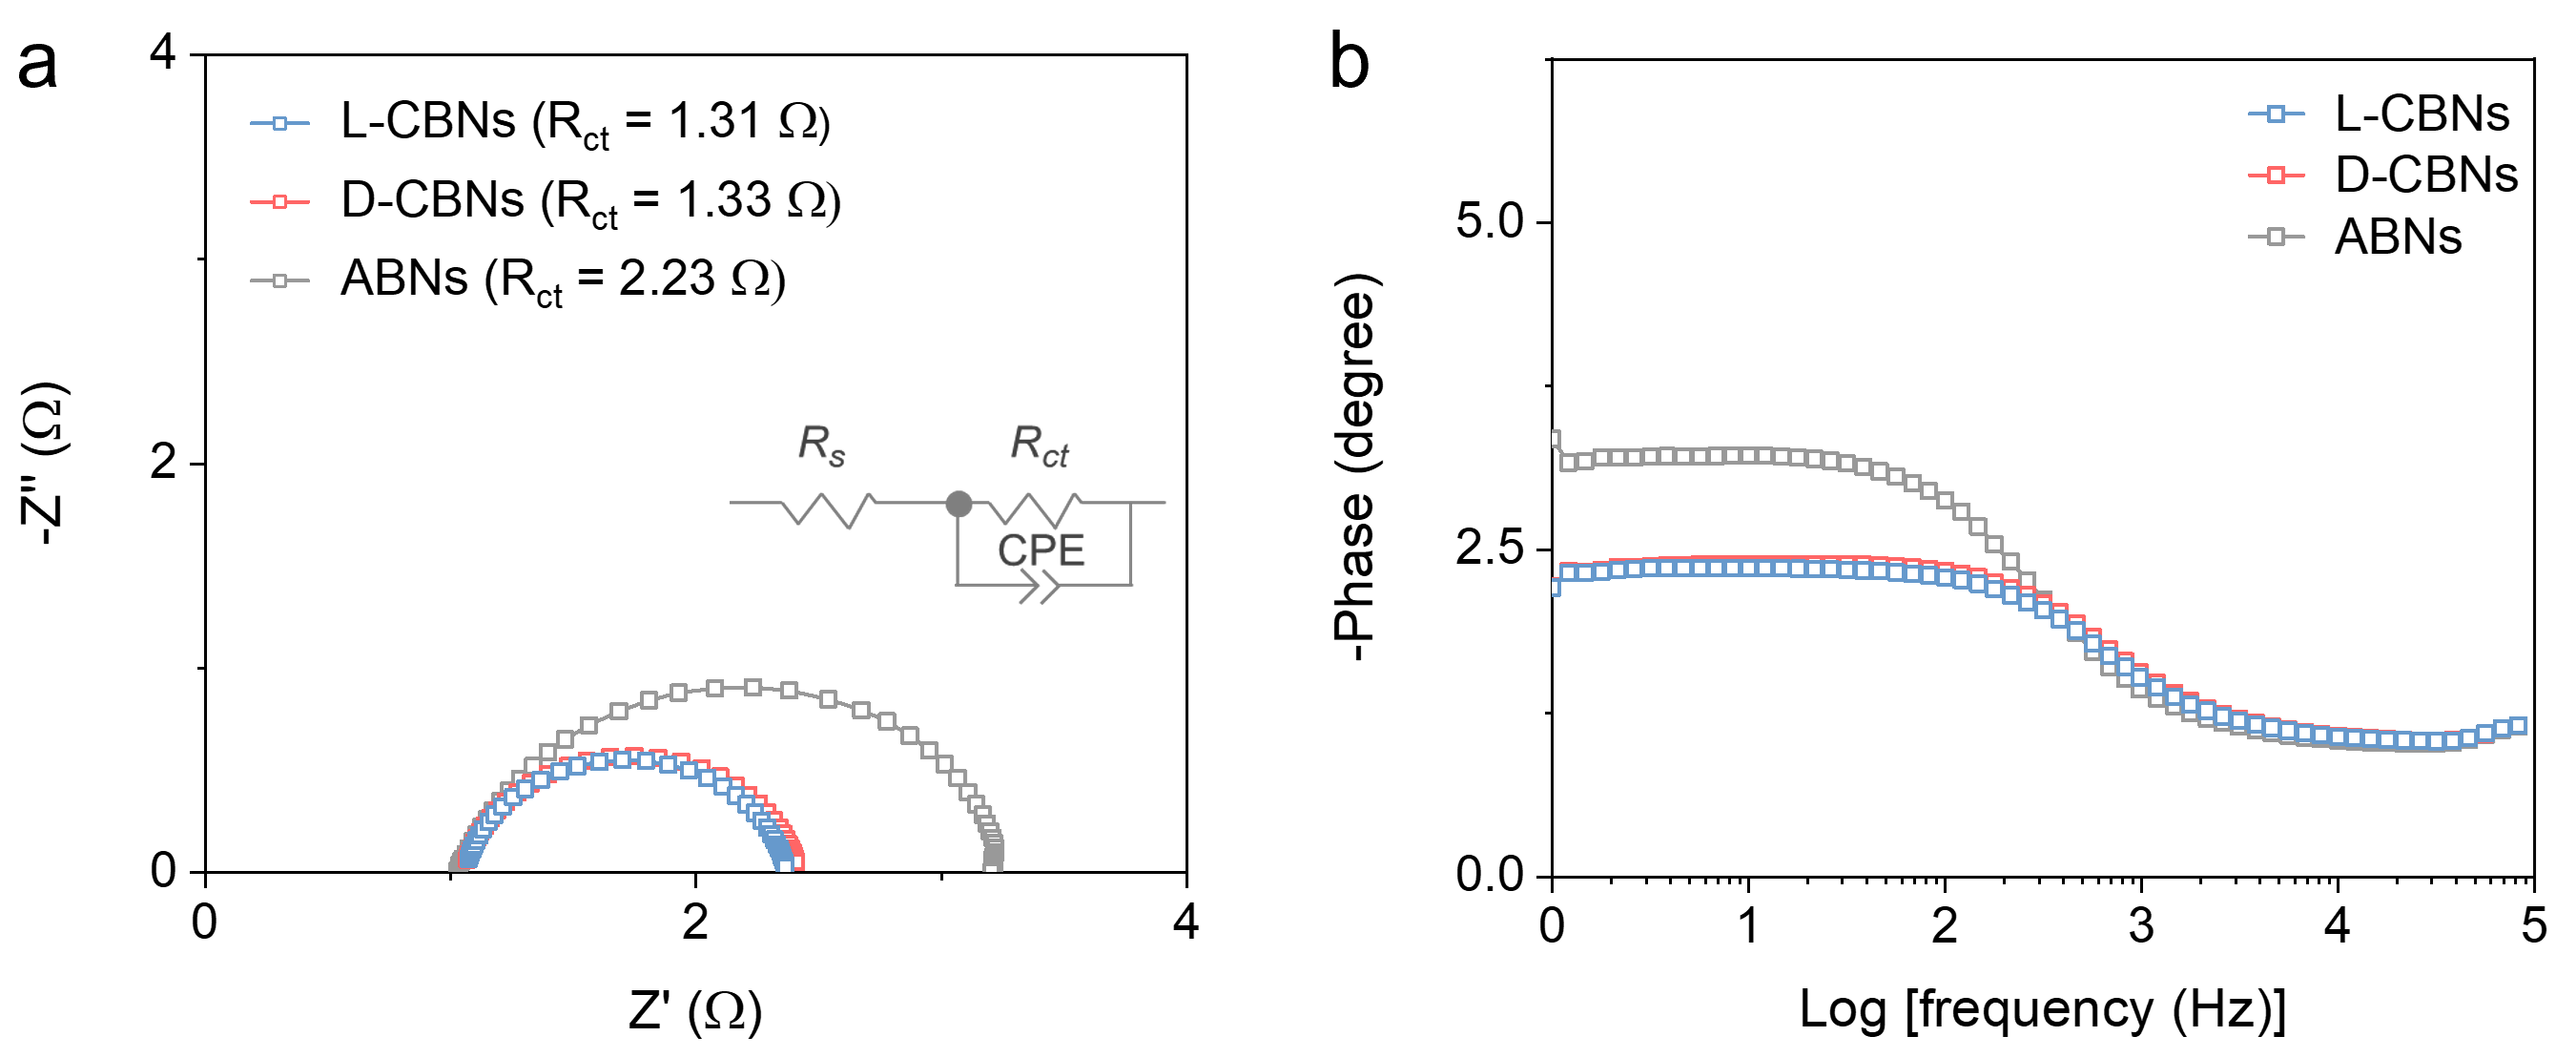


**Supplementary Figure 29.** (a) Nyquist plots, and (b) bode phase plots of L-CBNs, D-CBNs, and ABNs electrodes in 0.5 M H2SO4 and 0.5 M KNO3 electrolyte.


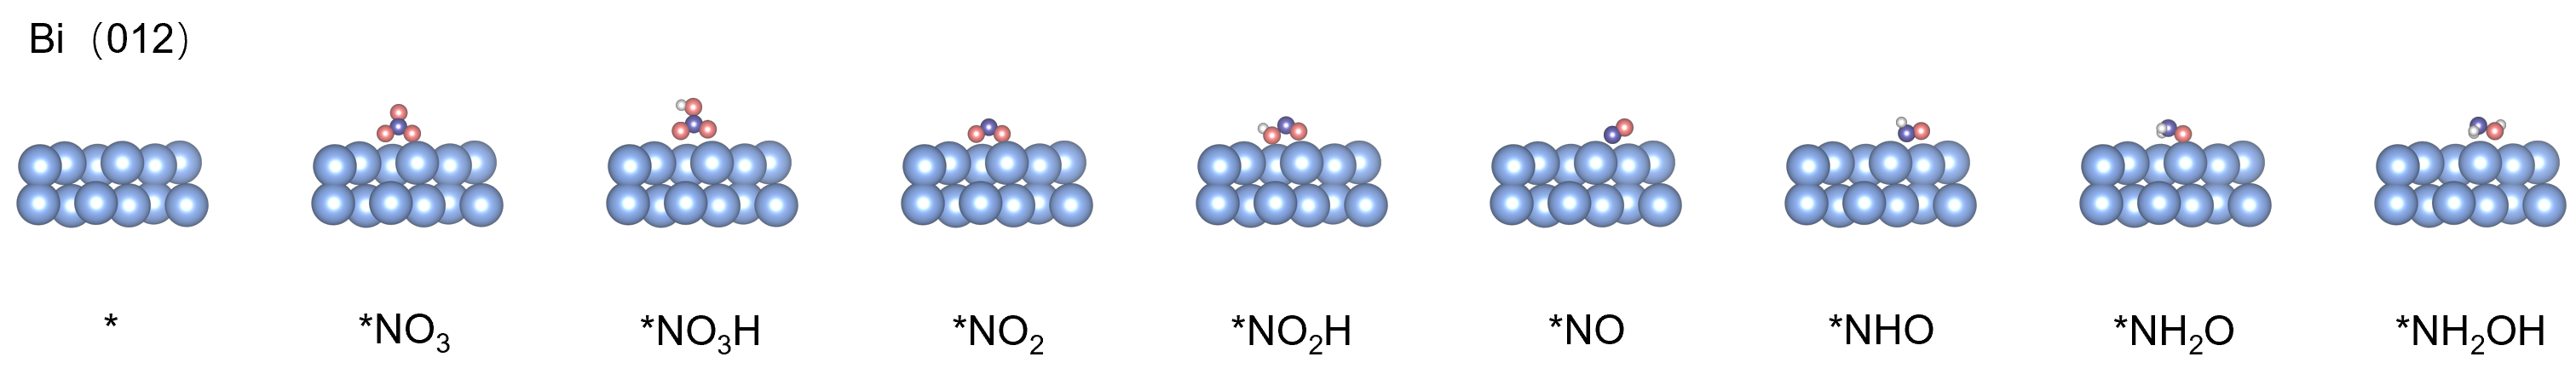


**Supplementary Figure 30.** The model of the NO3- reduction reaction over the Bi (012) surfaces for L-CBNs.


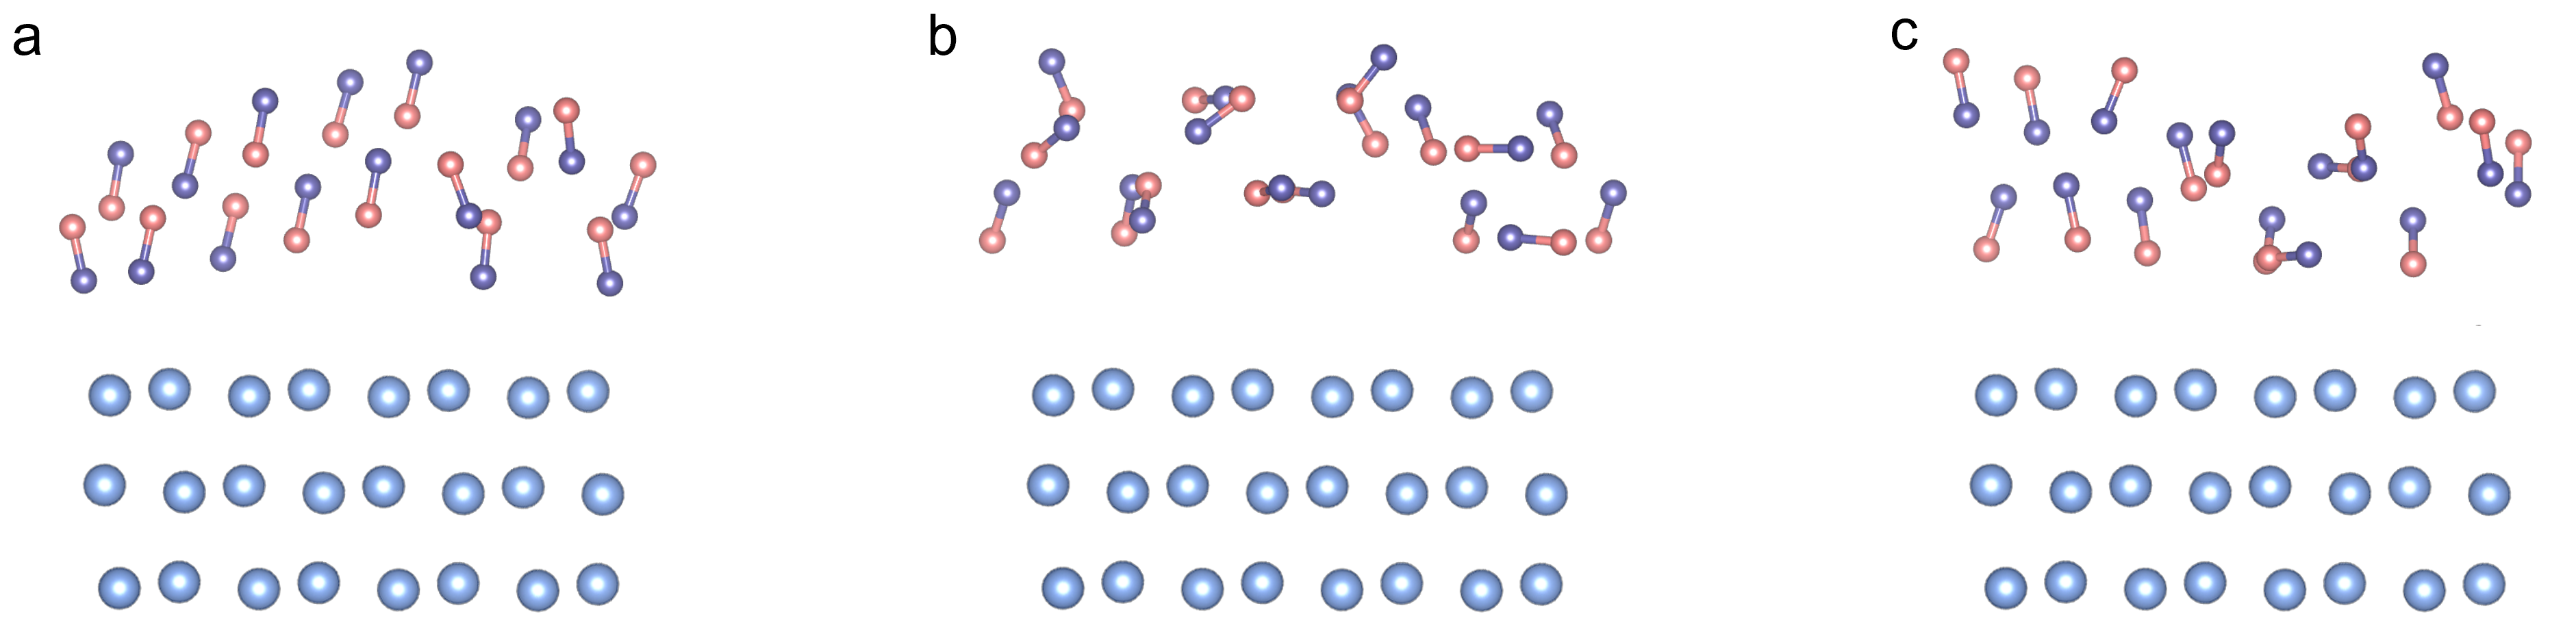


**Supplementary Figure 31.** Optimized DFT configurations illustrate the adsorption of *NO with different spin configuration on spin-polarized Bi (012) surfaces for L-CBNs. All L-CBNs spins are aligned parallel to each other (e.g. spin-up, this is a model limit used to compare different spin coupling paths, rather than a direct description of the actual spin density), and NO radical spin is aligned either (a) antiparallel (spin-down) or c) parallel (spin-up) to the L-CBNs spin. (b) The ABNs spins are random; there are no spin polarization effect2.


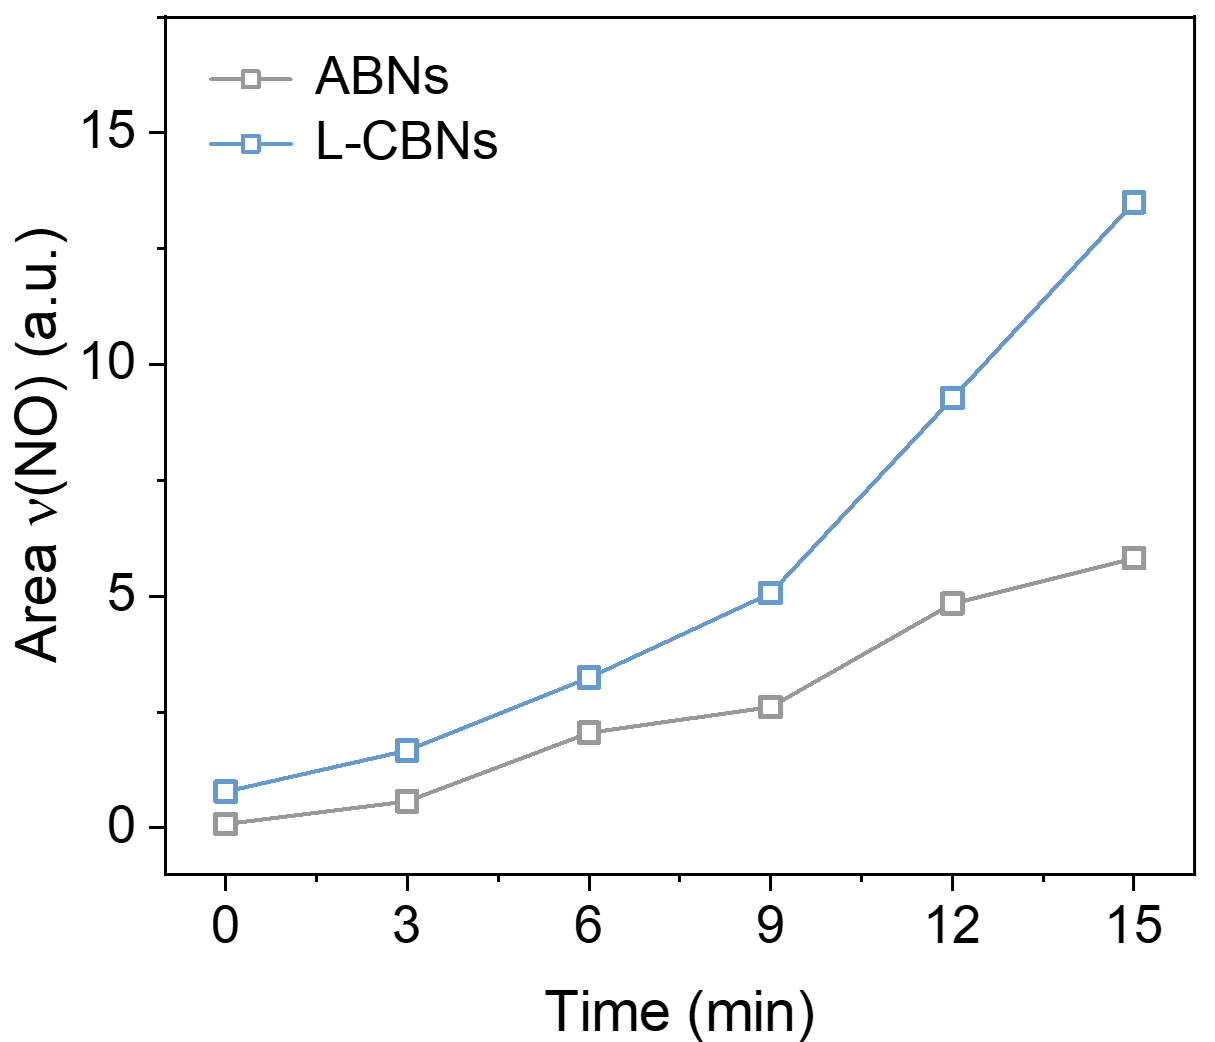


**Supplementary Figure 32.** The integrated area of ν(NO) in the time-dependent in situ ATR−FTIR spectra during the reduction of KNO3 for NH2OH over ABNs and L-CBNs electrodes.


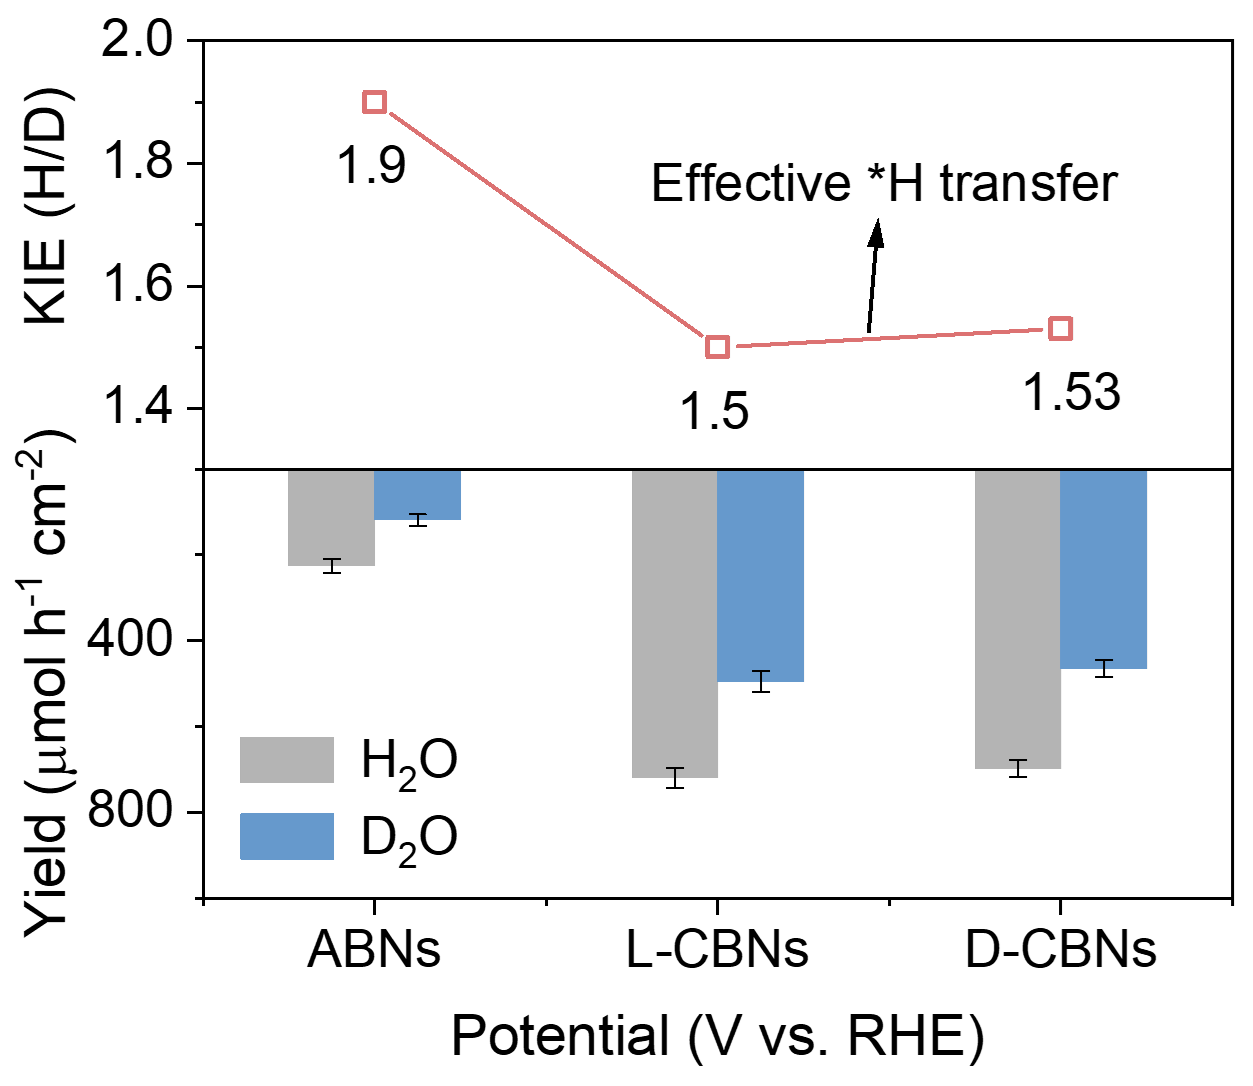


**Supplementary Figure 33.** Related KIE and the NH2OH yields of ABNs, L-CBNs and D-CBNs electrodes for NO3RR, with H2O or D2O as solutions.


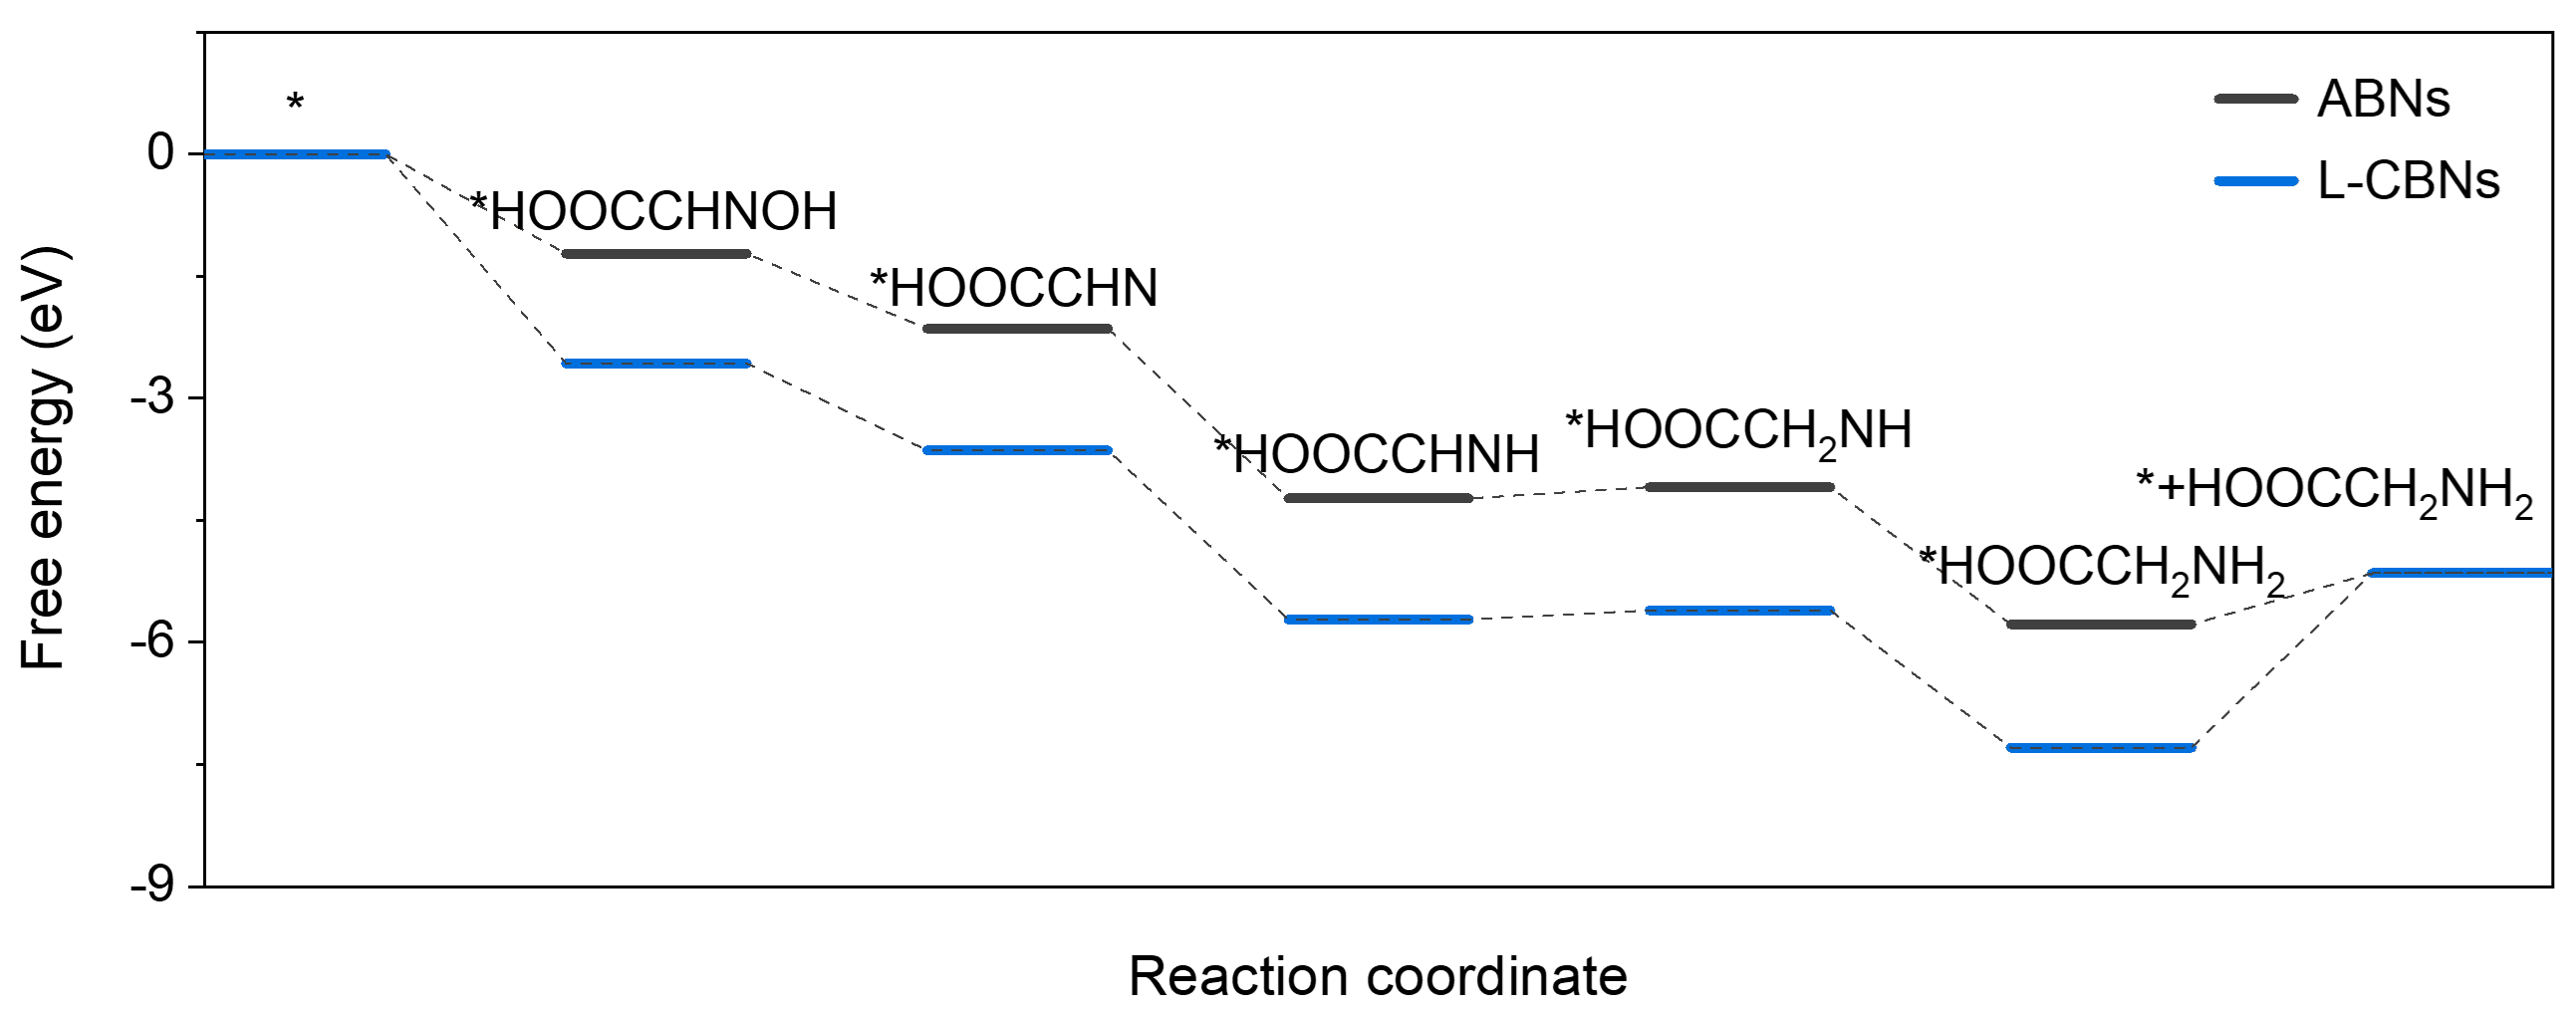


**Supplementary Figure 34.** Free energy diagram for glycine formation on ABNs and L-CBNs (012) facets. * indicates an adsorption site.


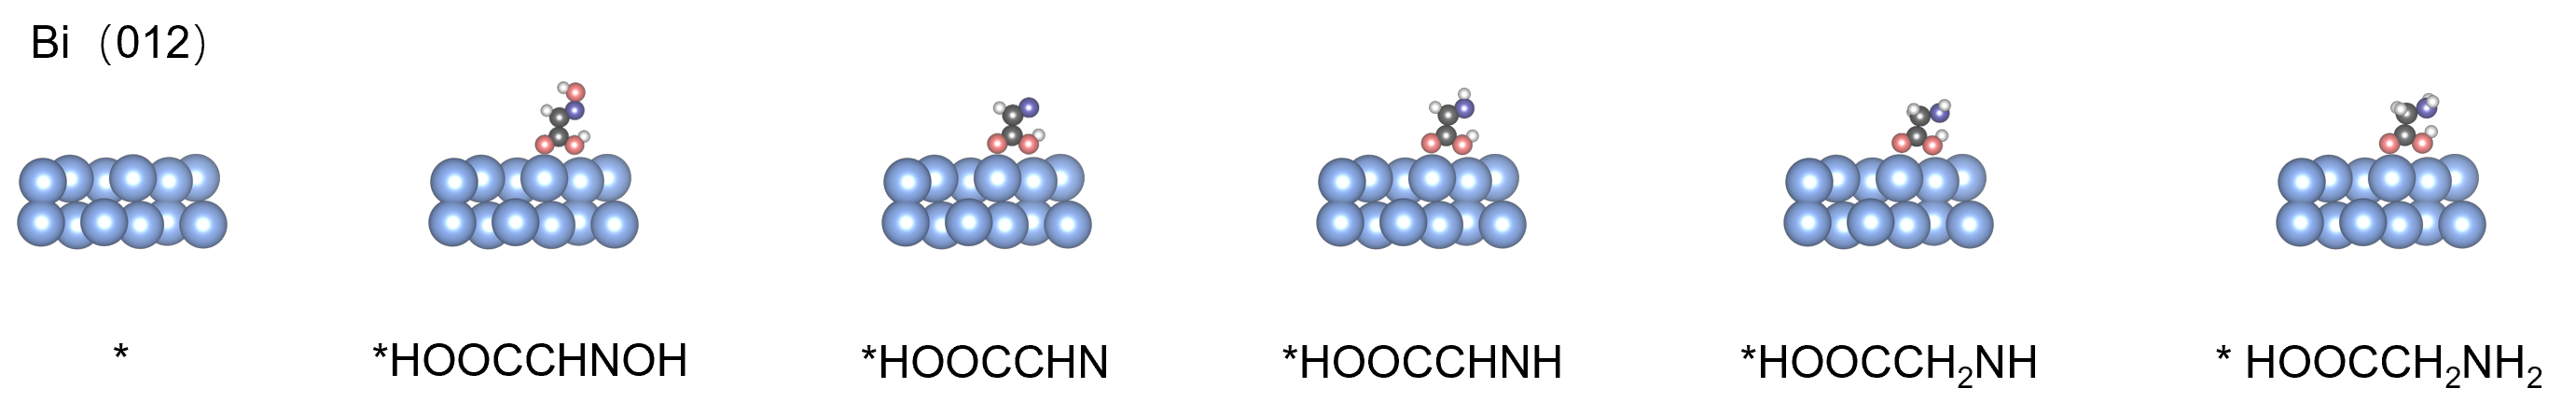


**Supplementary Figure 35.** The model of the NO3- and glyoxylic acid co-reduction reaction over the Bi (012) surfaces for L-CBNs.


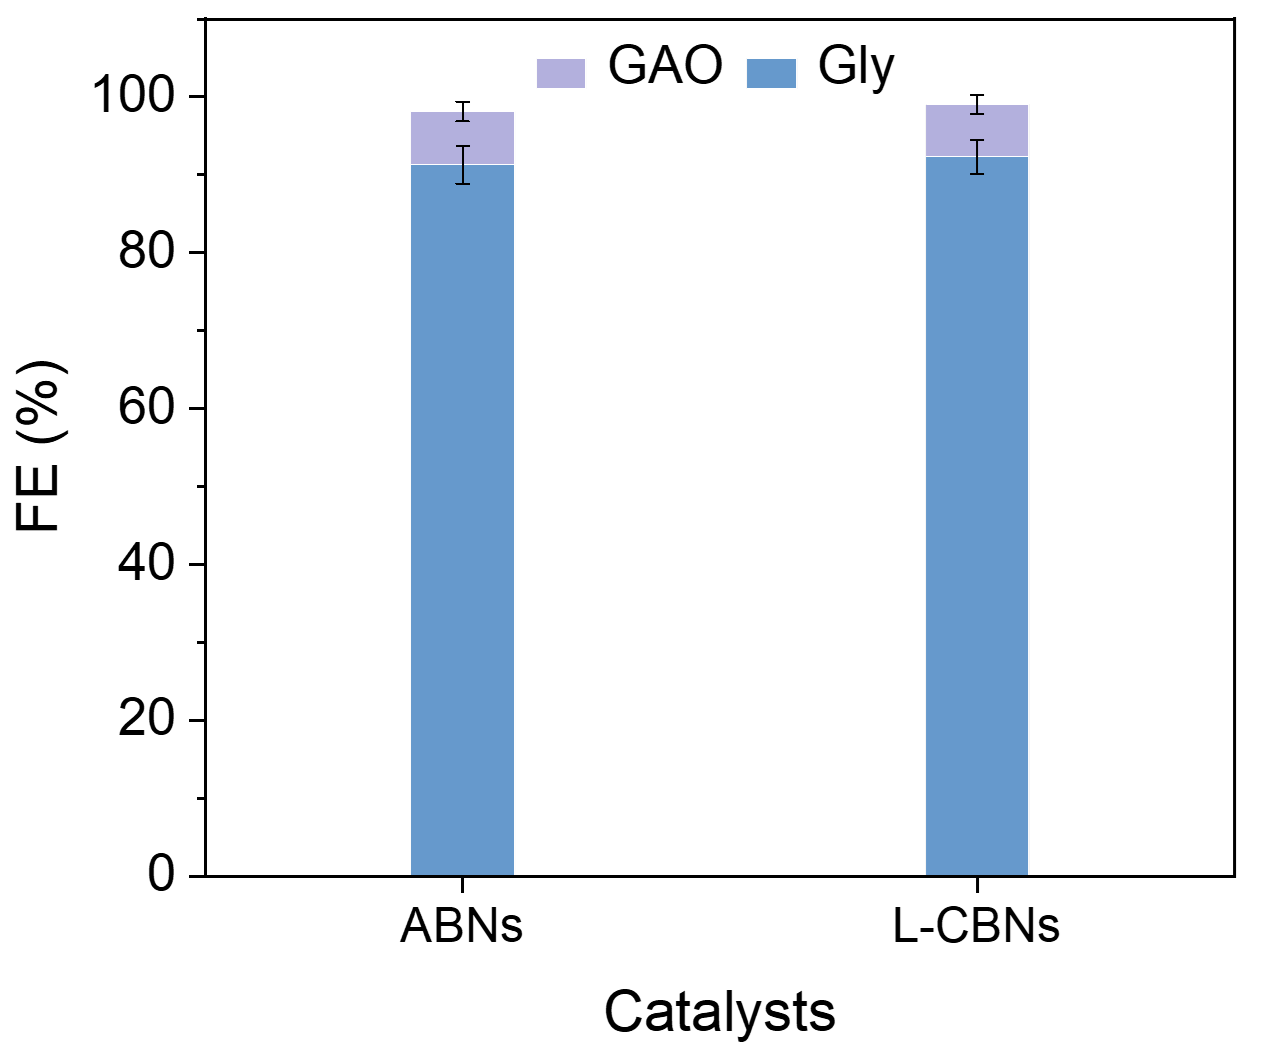


**Supplementary Figure 36.** FEGly for ABNs and L-CBNs electrodes in 0.5 M NH2OH and 0.15 M GX electrolyte.


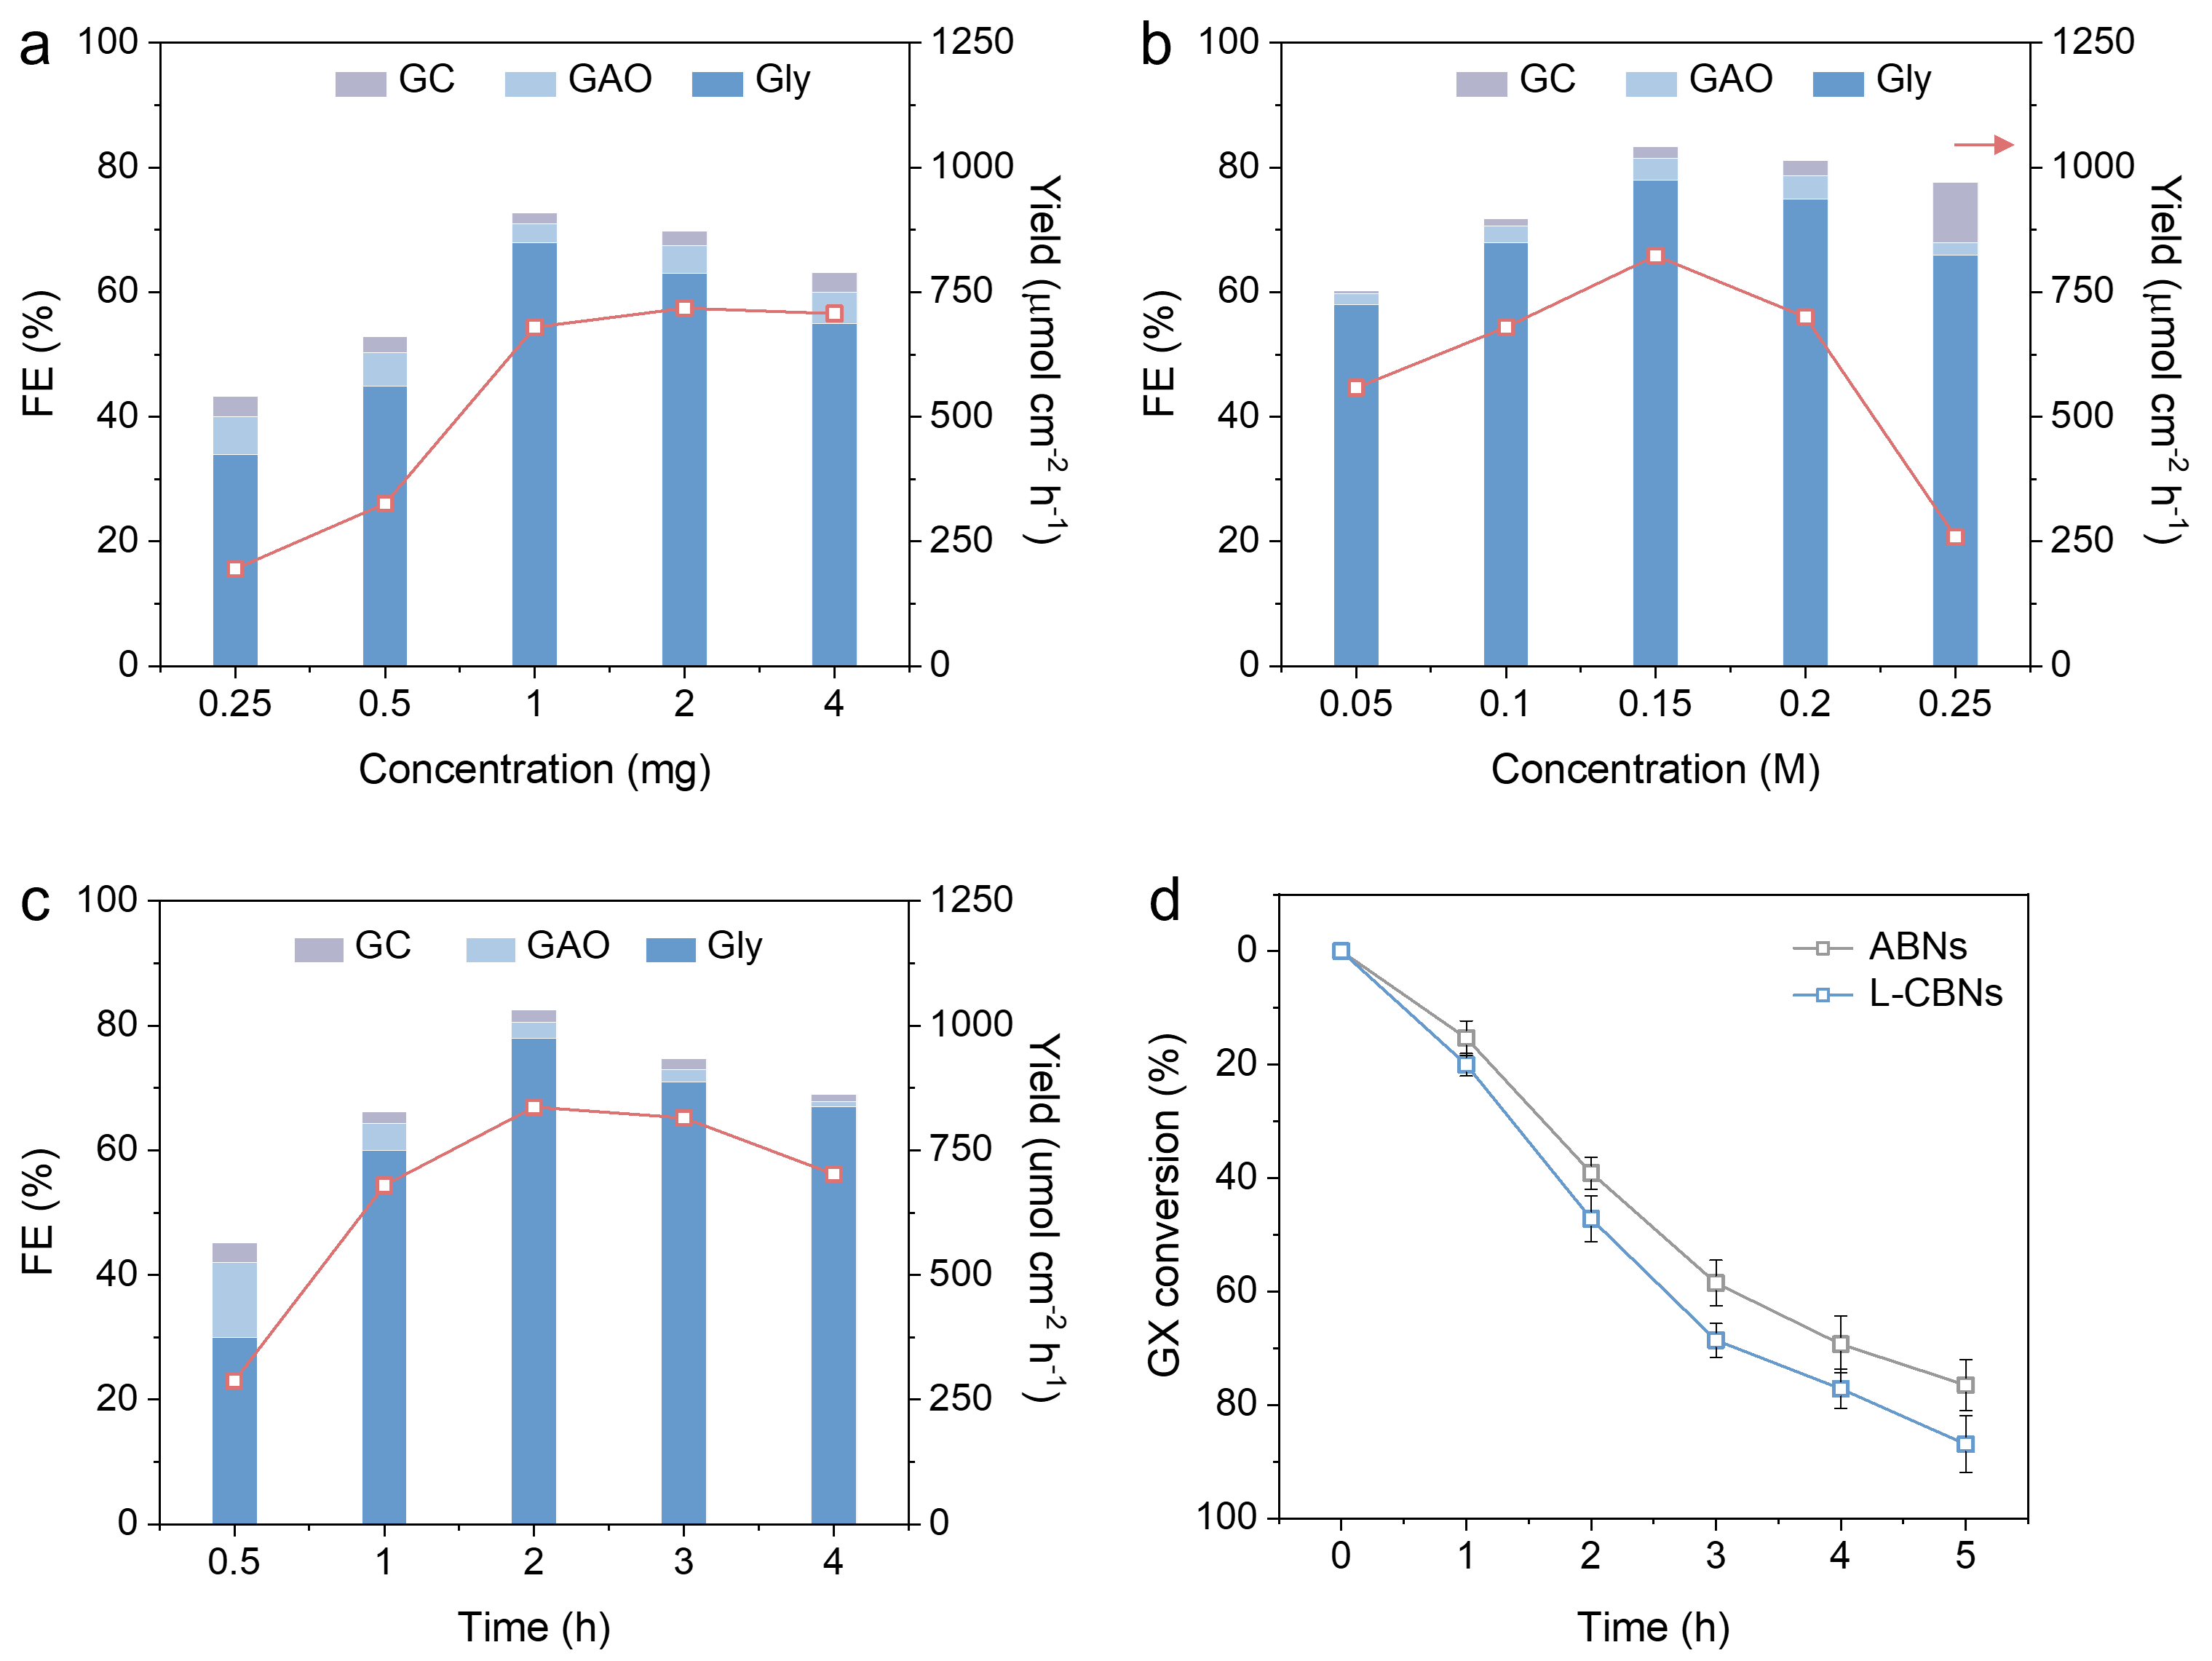


**Supplementary Figure 37.** (a) Comparison of product distribution and glycine yield on different quality of L-CBNs electrode at 1*1 cm2 electrode. (b) Comparison of product distribution and glycine yield on L-CBNs electrode at containing different concentrations of GX. (c) Comparison of product distribution and glycine yield on L-CBNs electrode at different reaction time. (d) Variation in the GX conversion with reaction time.


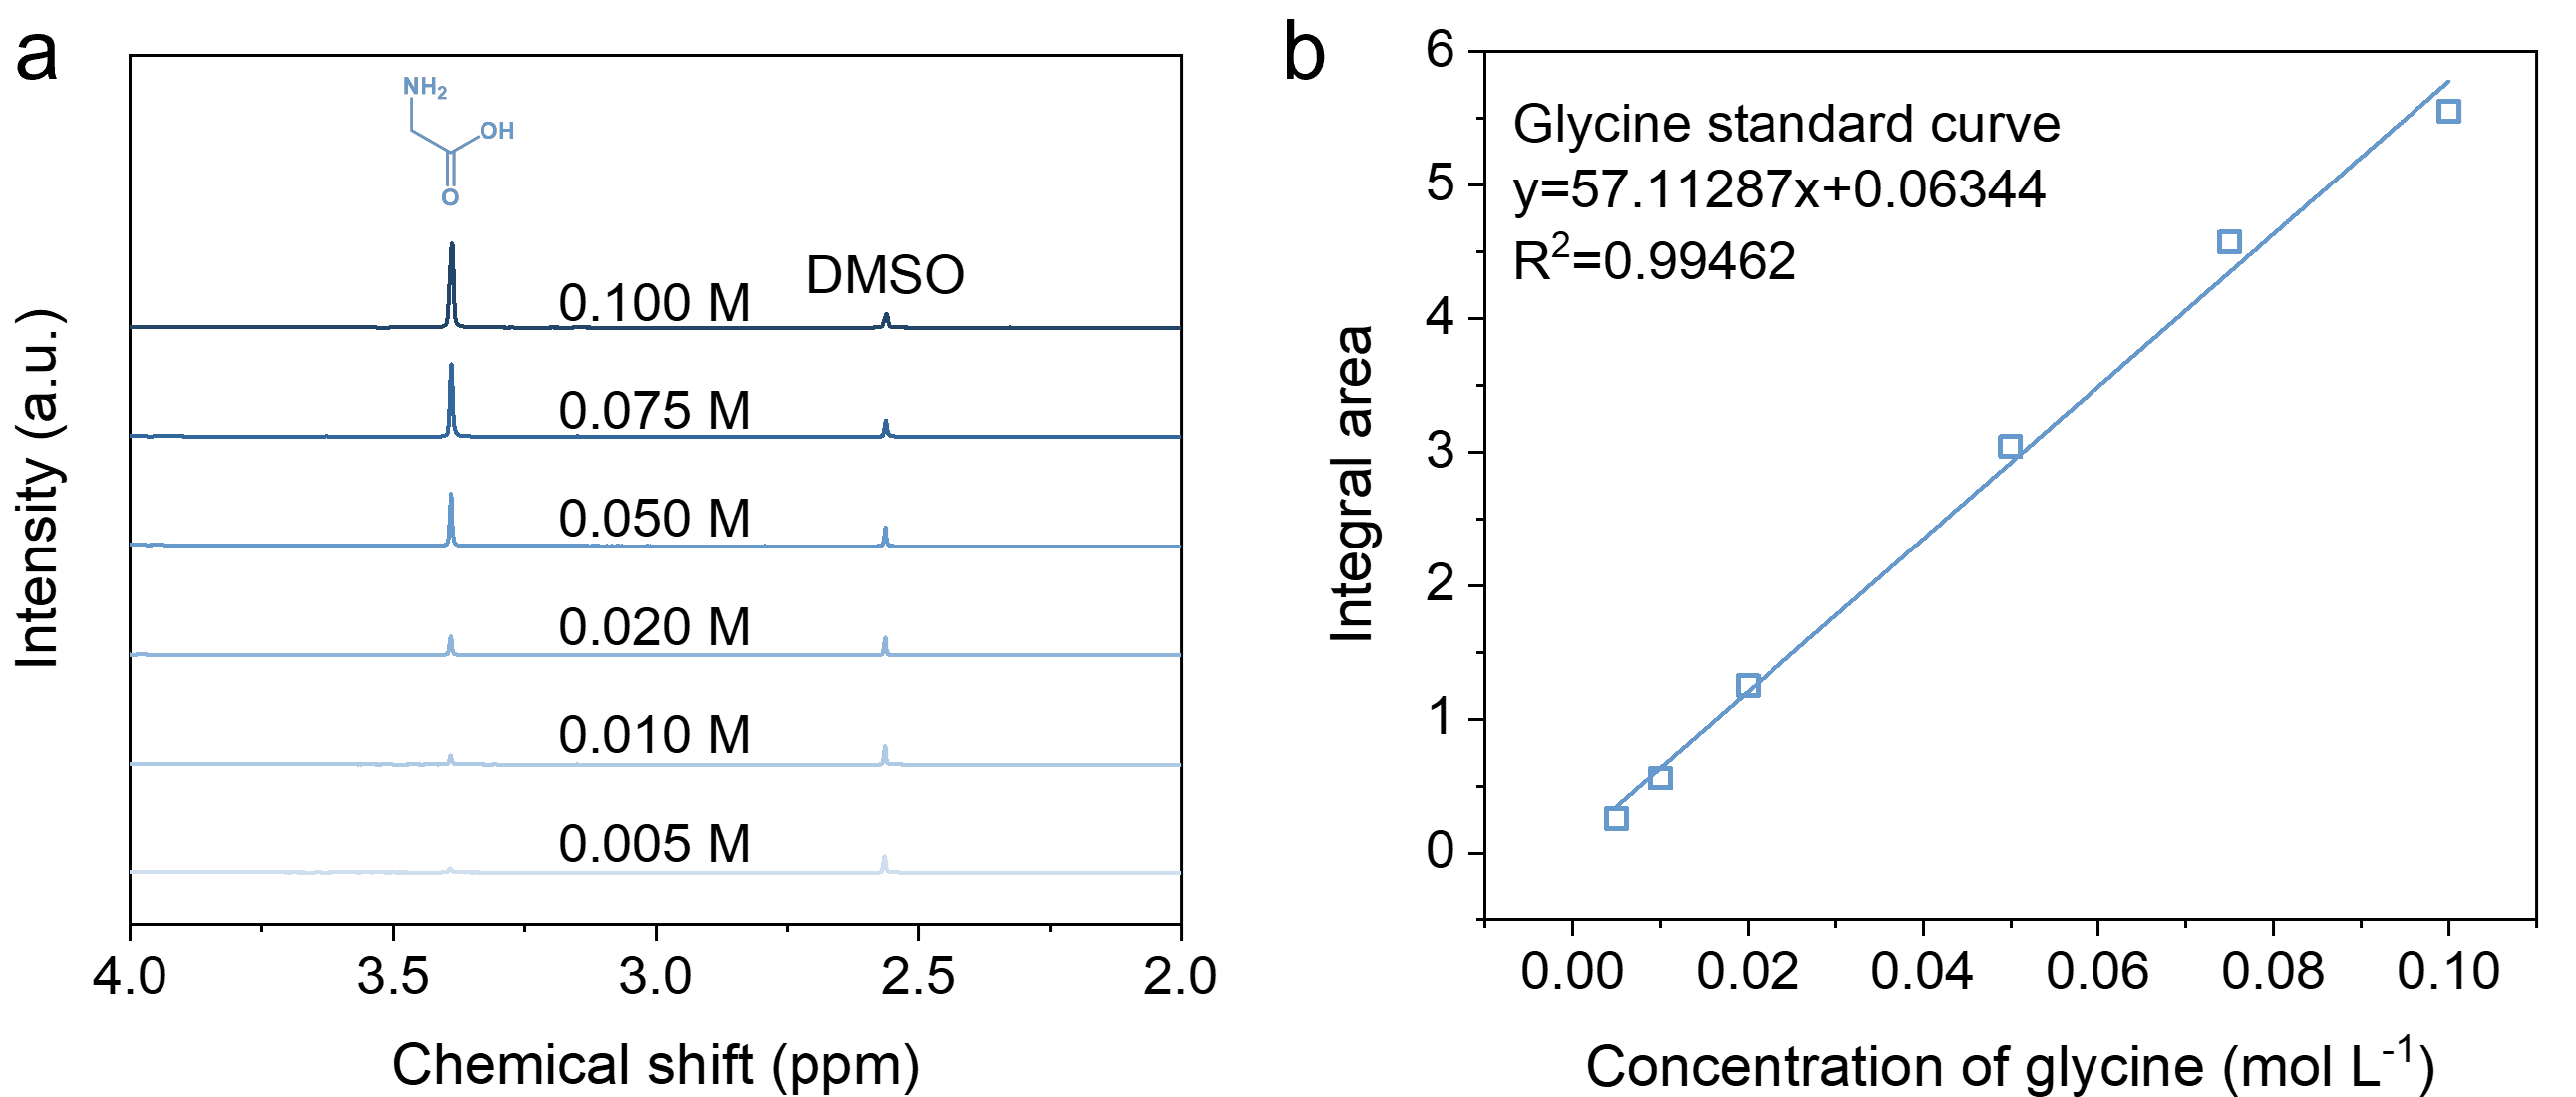


**Supplementary Figure 38.** (a) 1H NMR spectra of standard glycine solution. (b) The standard curve of 1H NMR integral area ratio (glycine: DMSO-H6) against glycine concentrations.


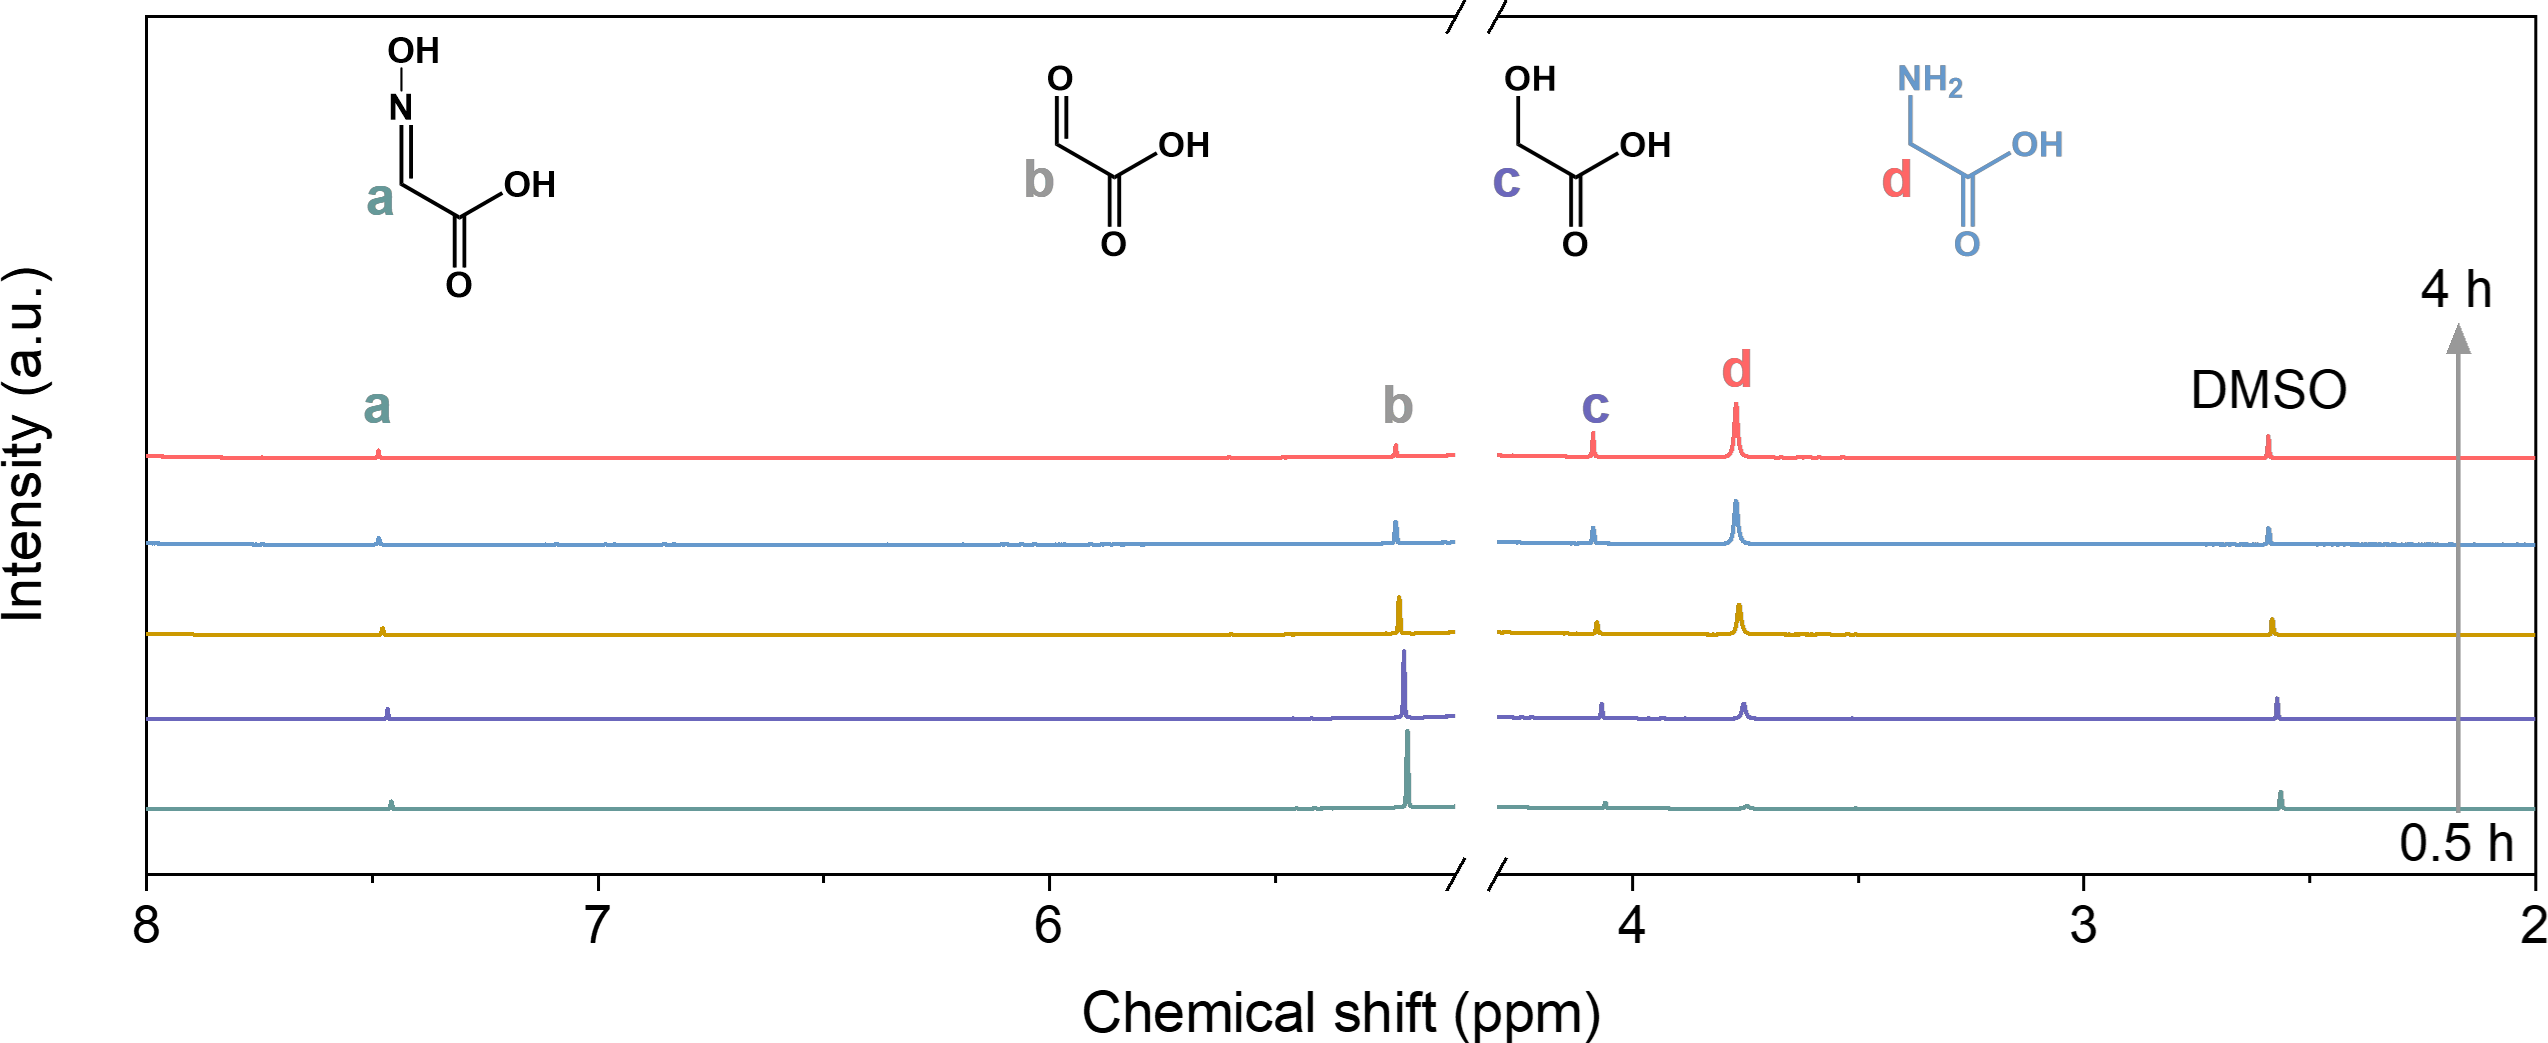


**Supplementary Figure 39.** 1H NMR spectra of different liquid products on L-CBNs with electrolysis time (0.5, 1, 2, 3, and 4 h).


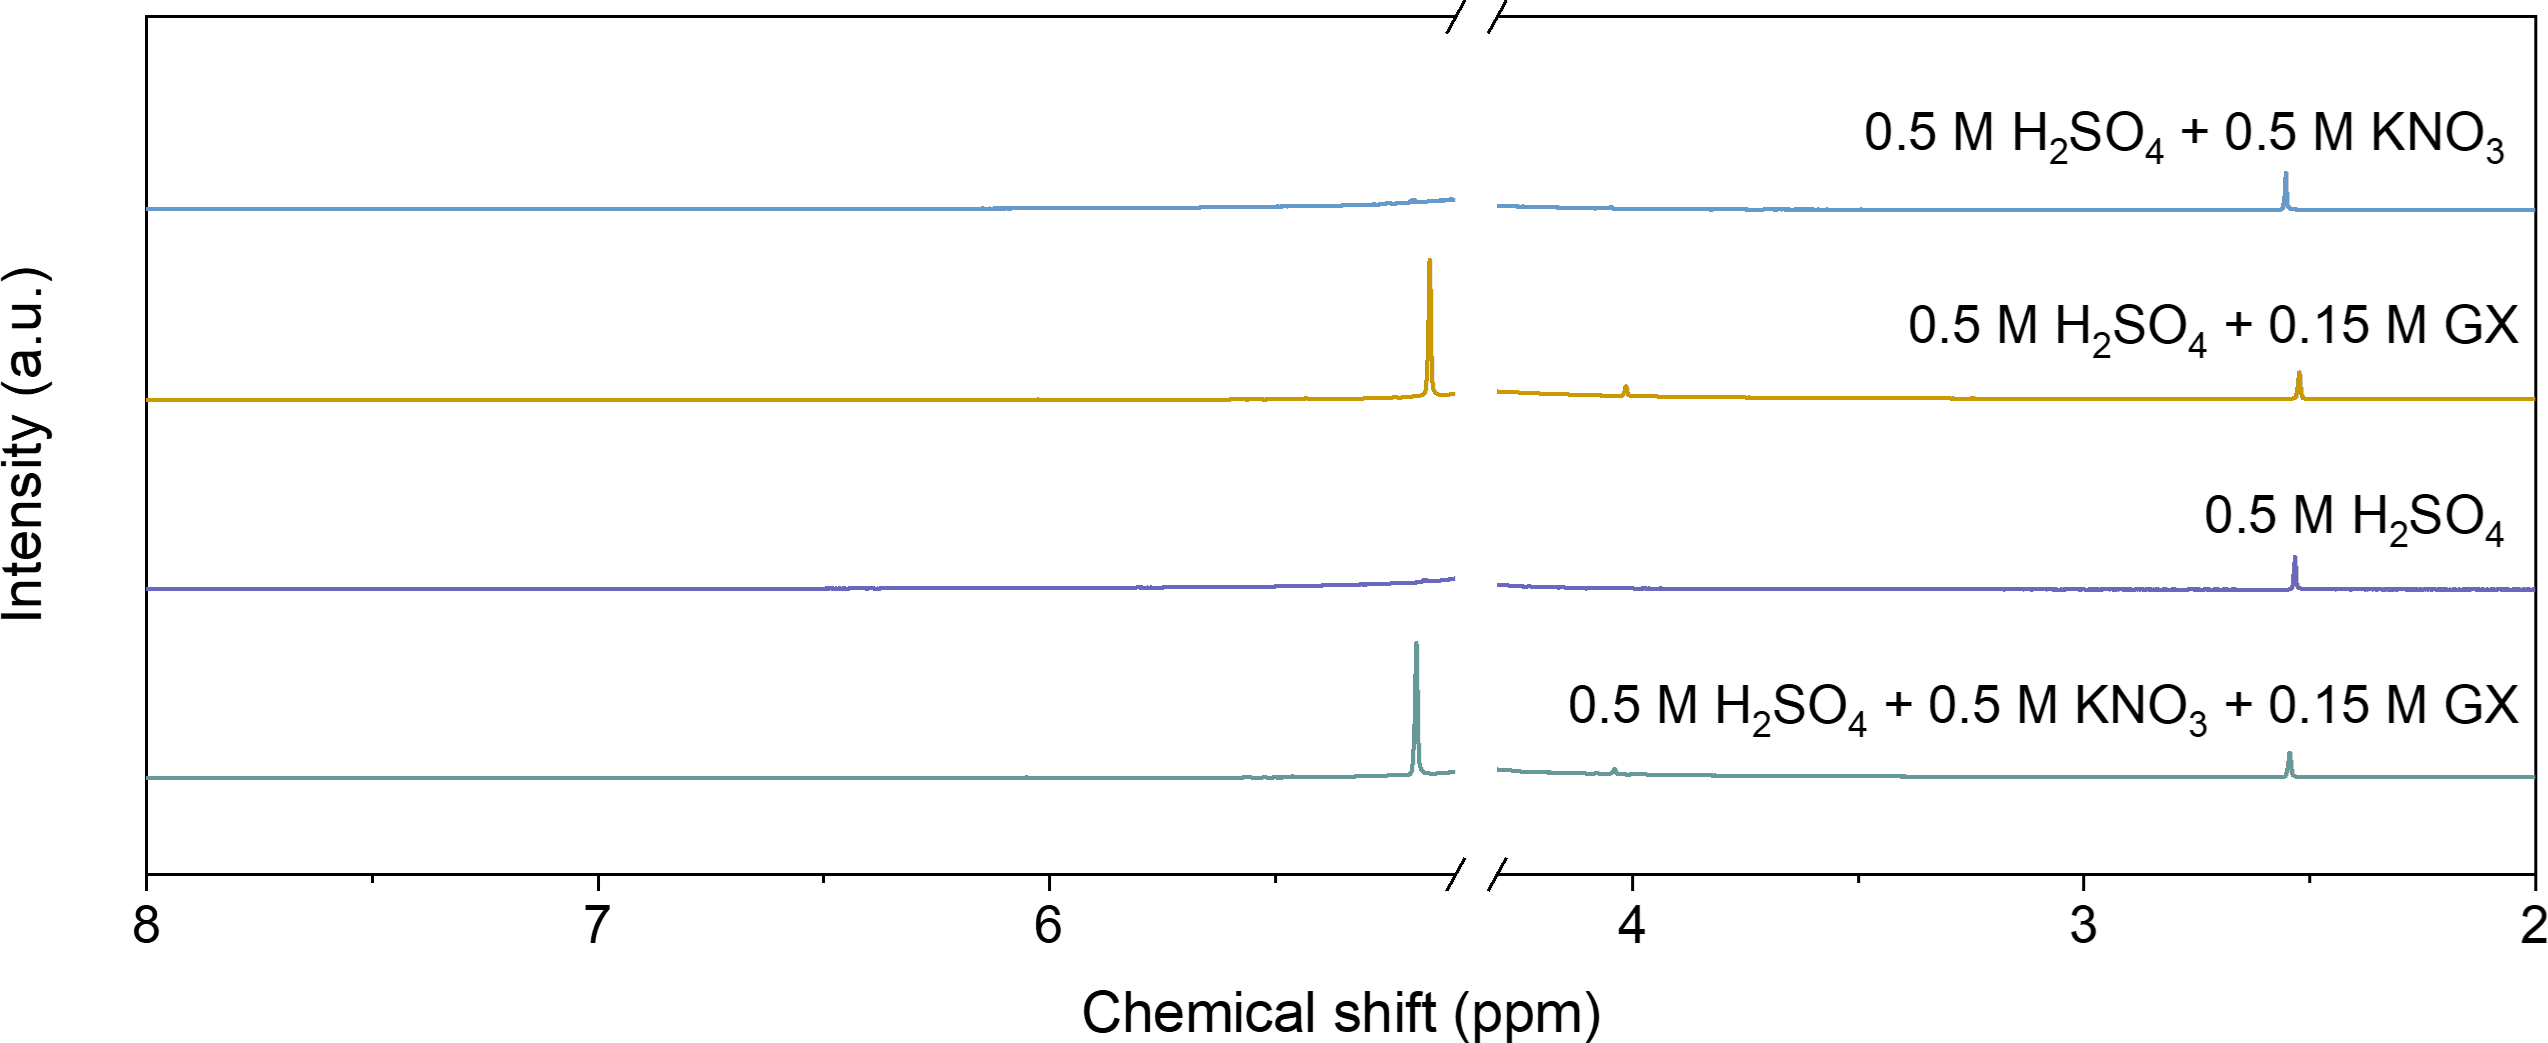


**Supplementary Figure 40.** 1H NMR spectra on L-CBNs at different electrolytes (0.5 M H2SO4 + 0.5 M KNO3; 0.5 M H2SO4 + 0.15 M GX; 0.5 M H2SO4) for electrolysis 0.5 h, and 1H NMR spectra on L-CBNs at the electrolyte (0.5 M H2SO4 + 0.5 M KNO3 + 0.15 M GX) without electricity.


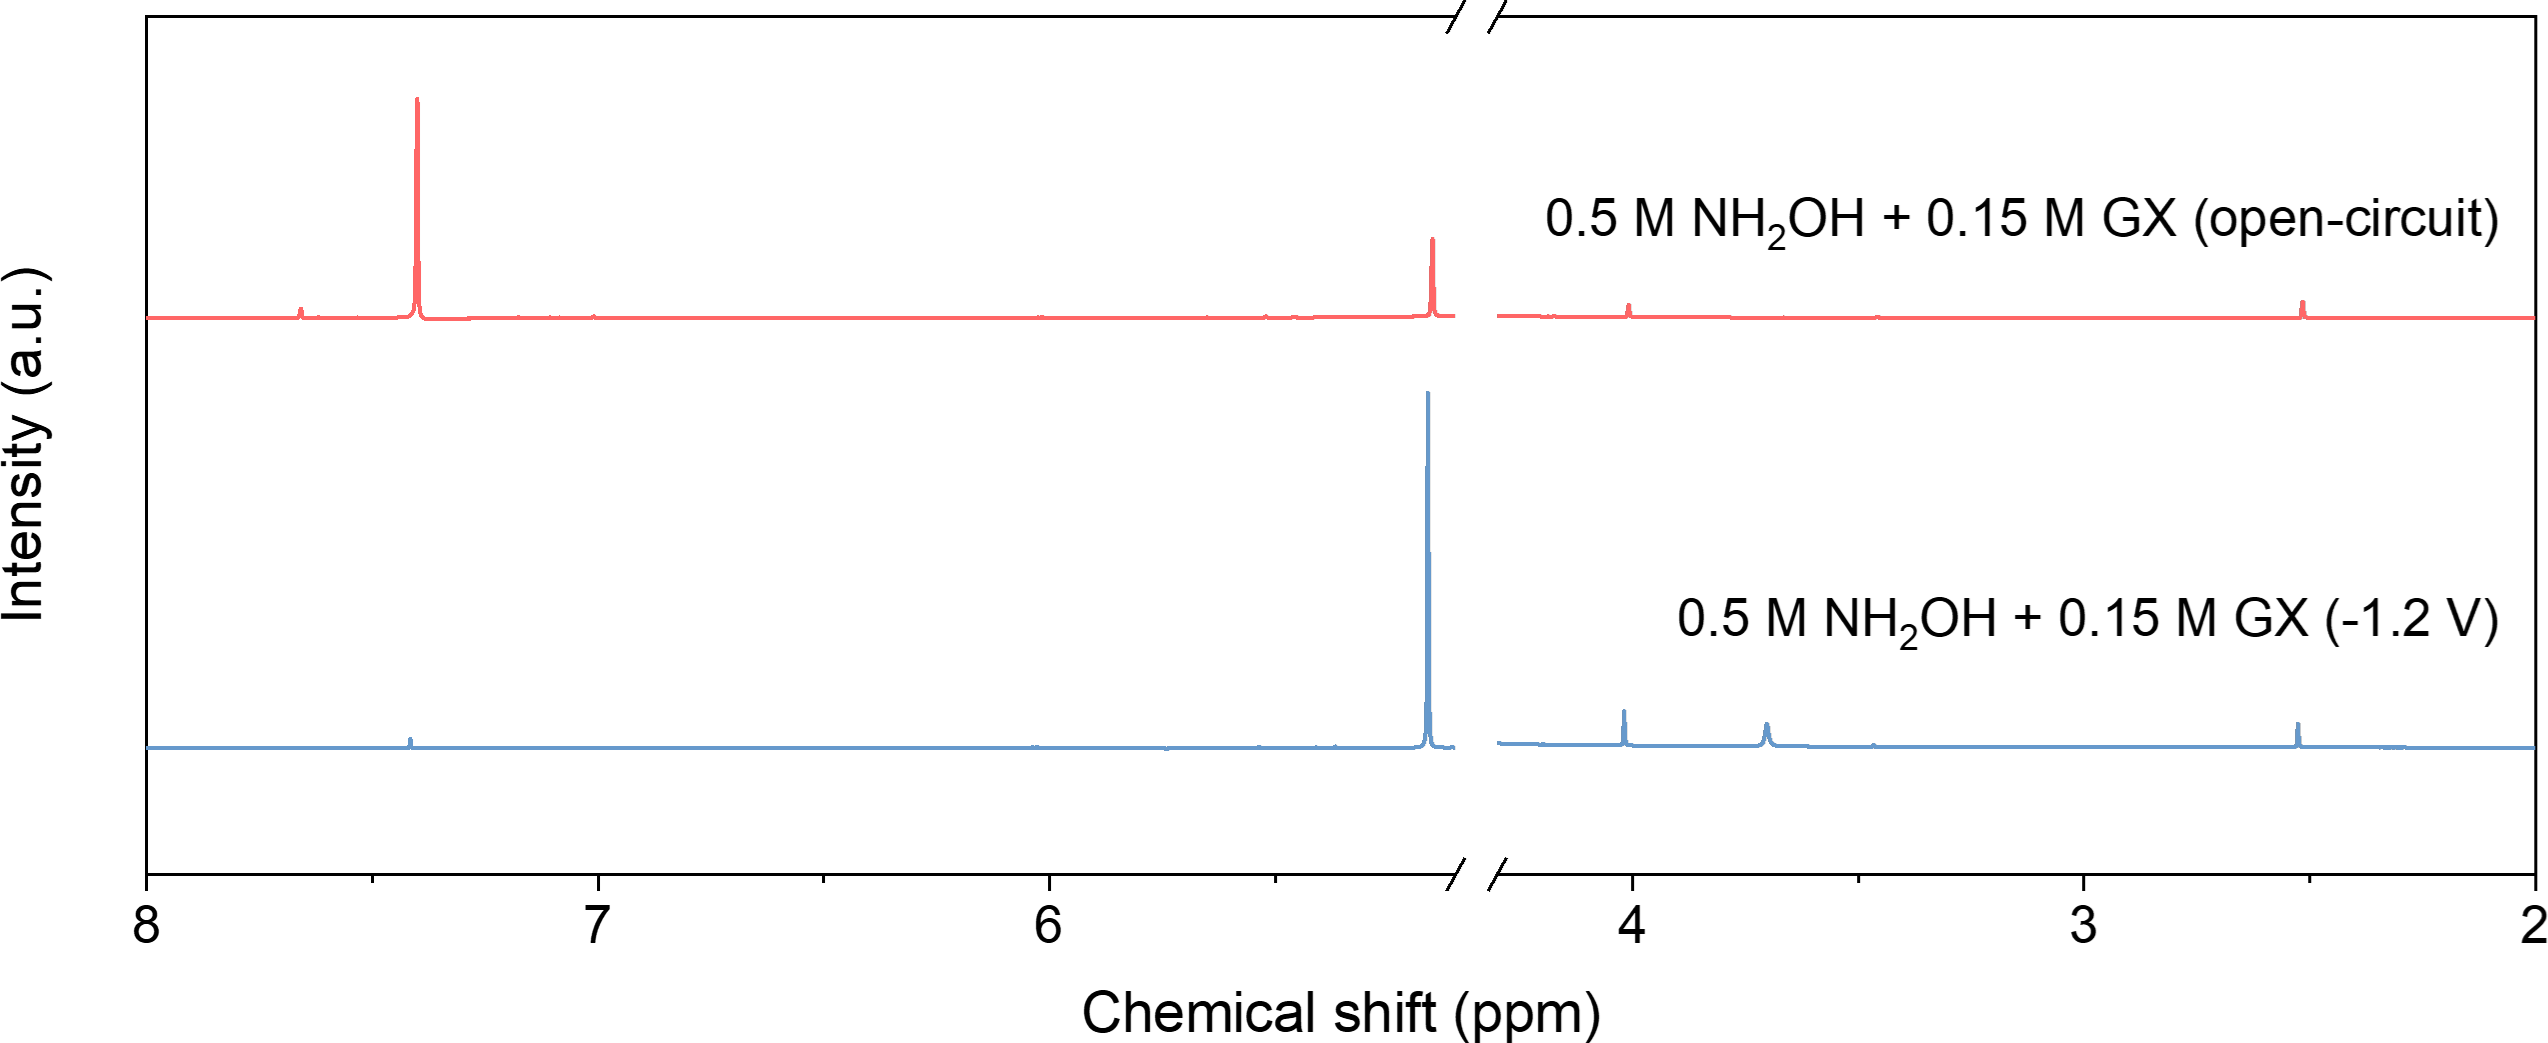


**Supplementary Figure 41.** 1H NMR spectra for L-CBNs in 0.5 M NH2OH and 0.15 M GX electrolyte at open-circuit and -1.2 V vs RHE.


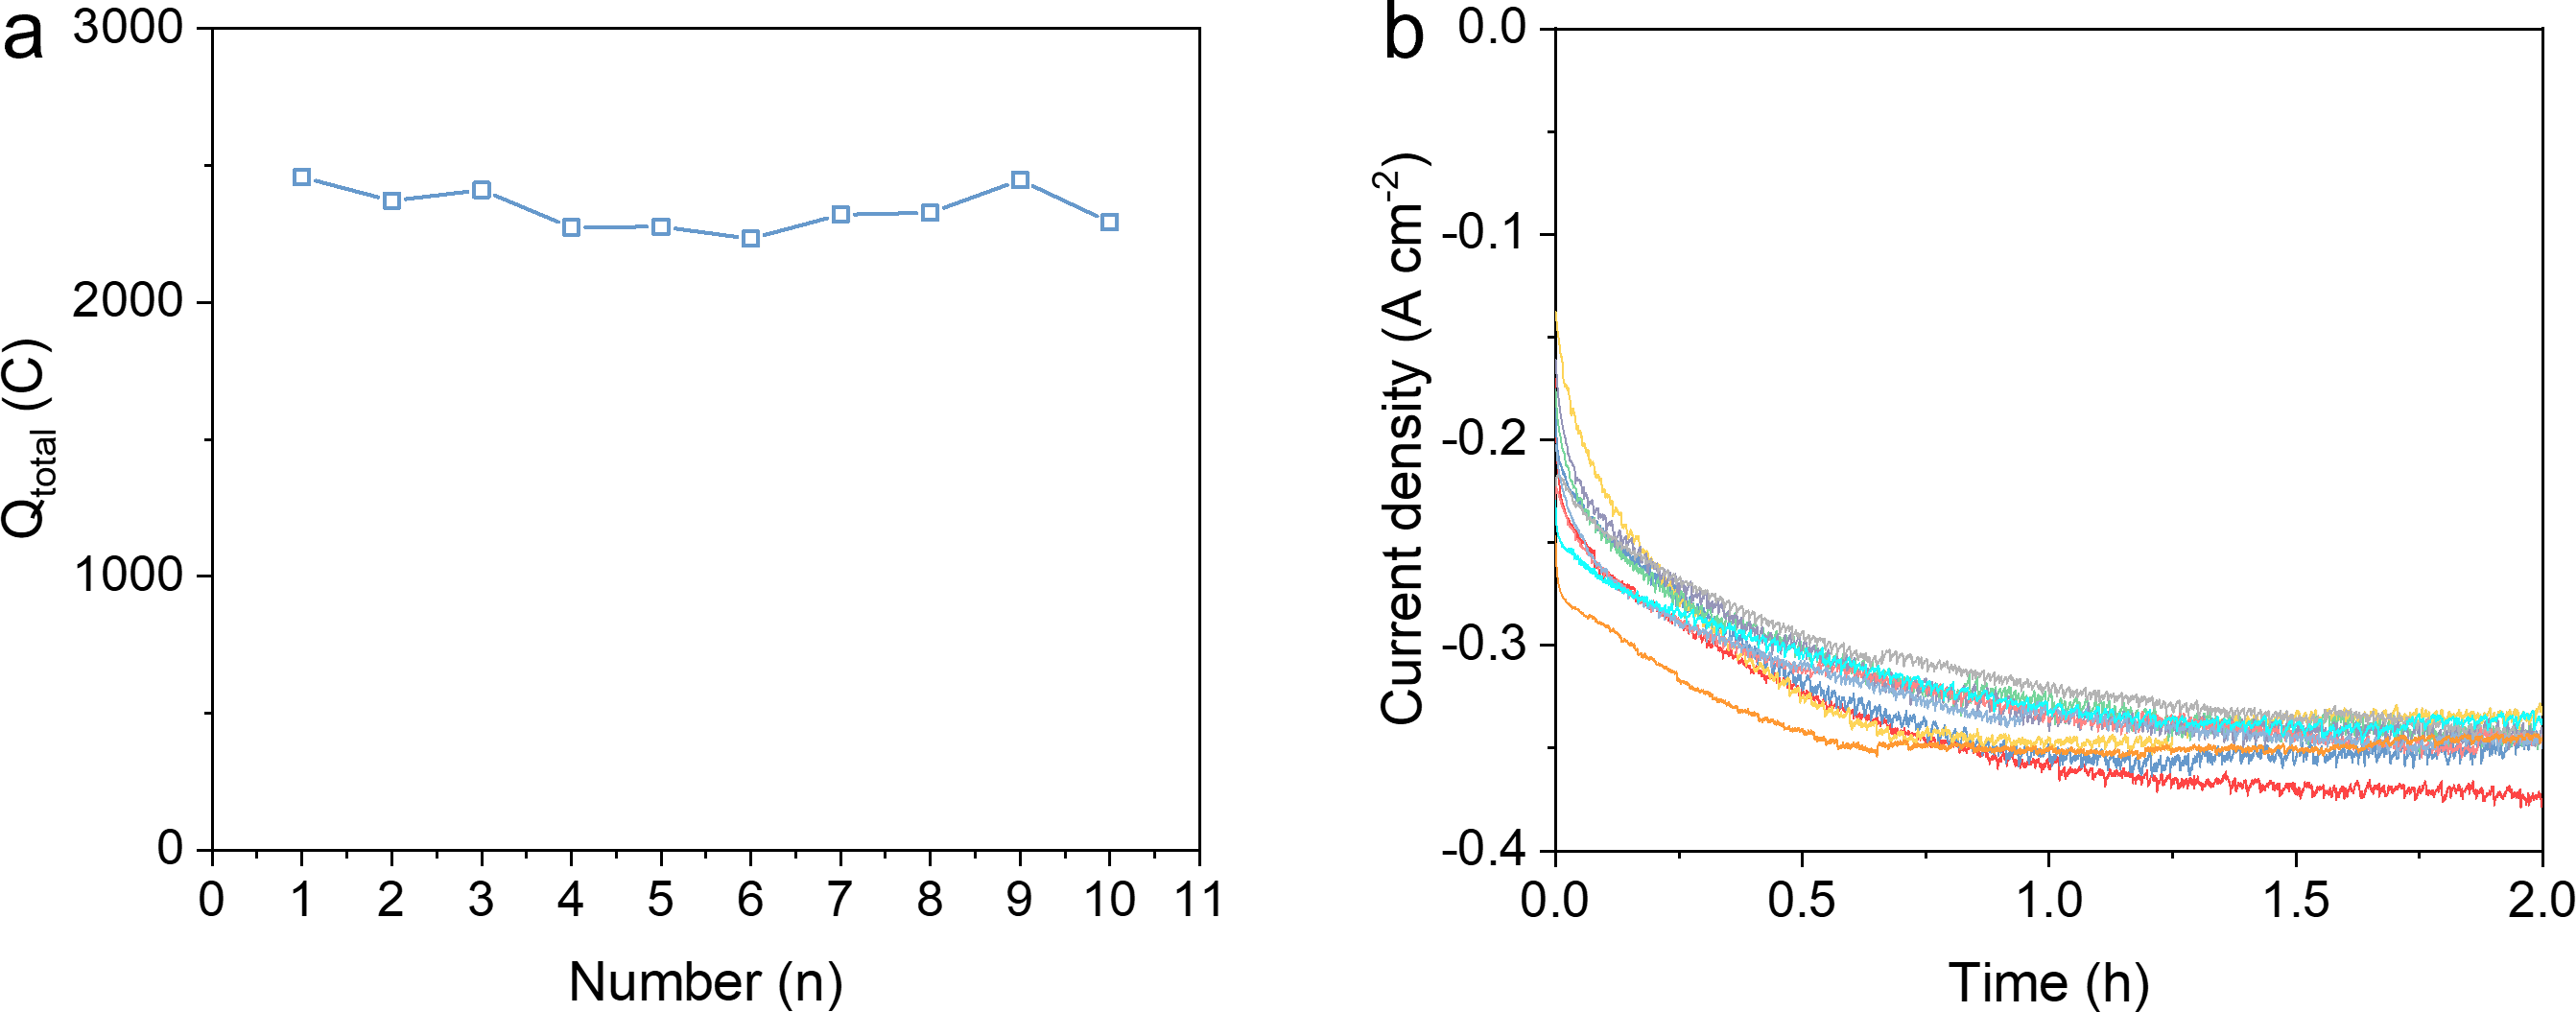


**Supplementary Figure 42.** Charge statistics (a) and it curves (b) of L-CBNs in cyclic stability test for glycine electrosynthesis.


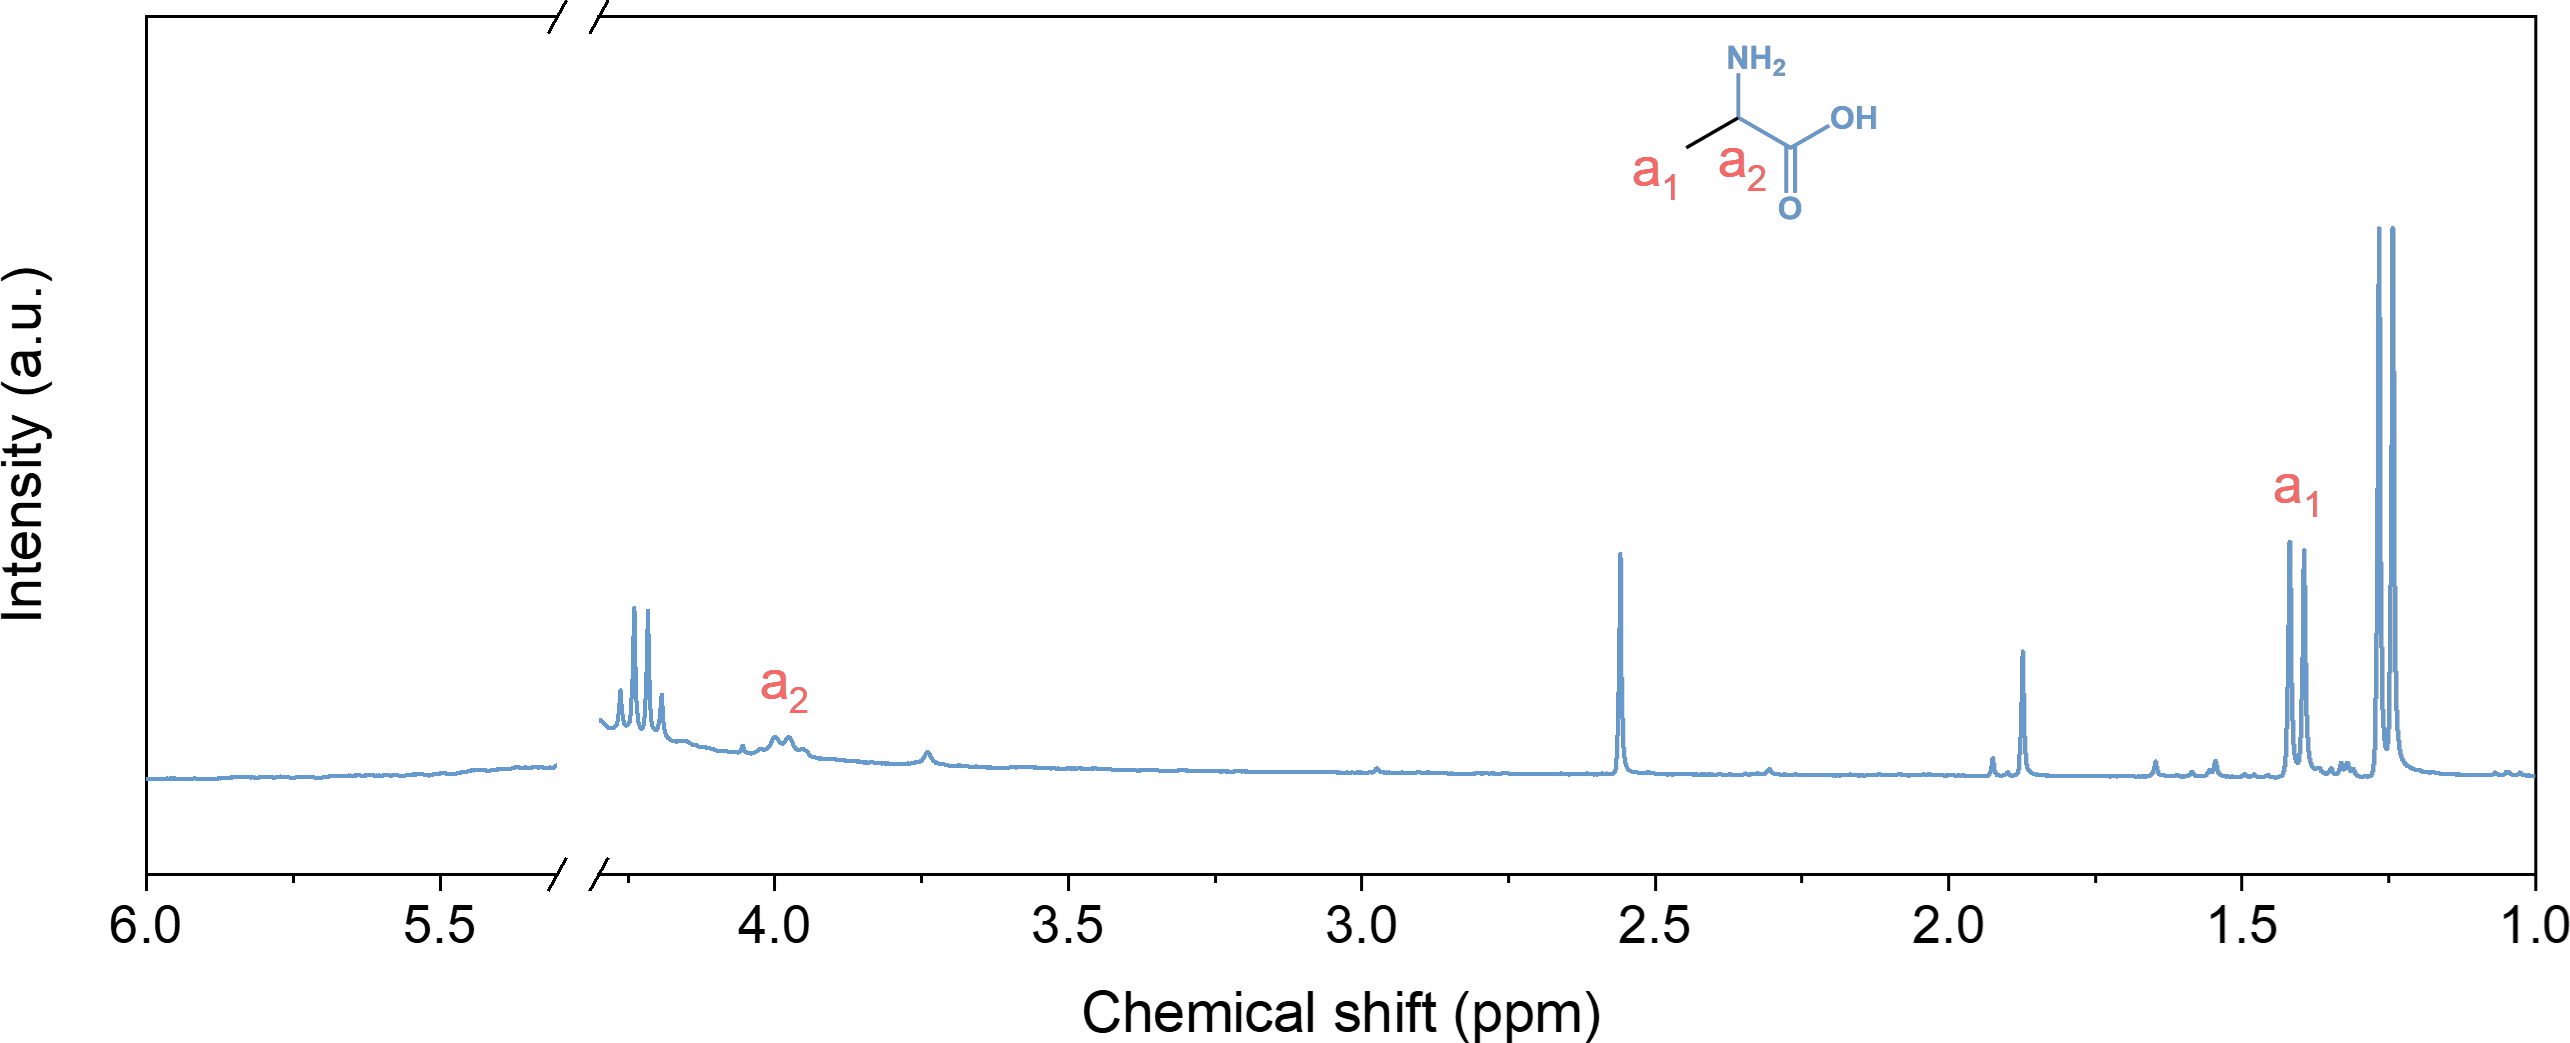


**Supplementary Figure 43.** 1H NMR spectra of electrolyte by using L-CBNs electrode after 1 h in electrocatalytic synthesis of alanine at -1.2 V vs. RHE.


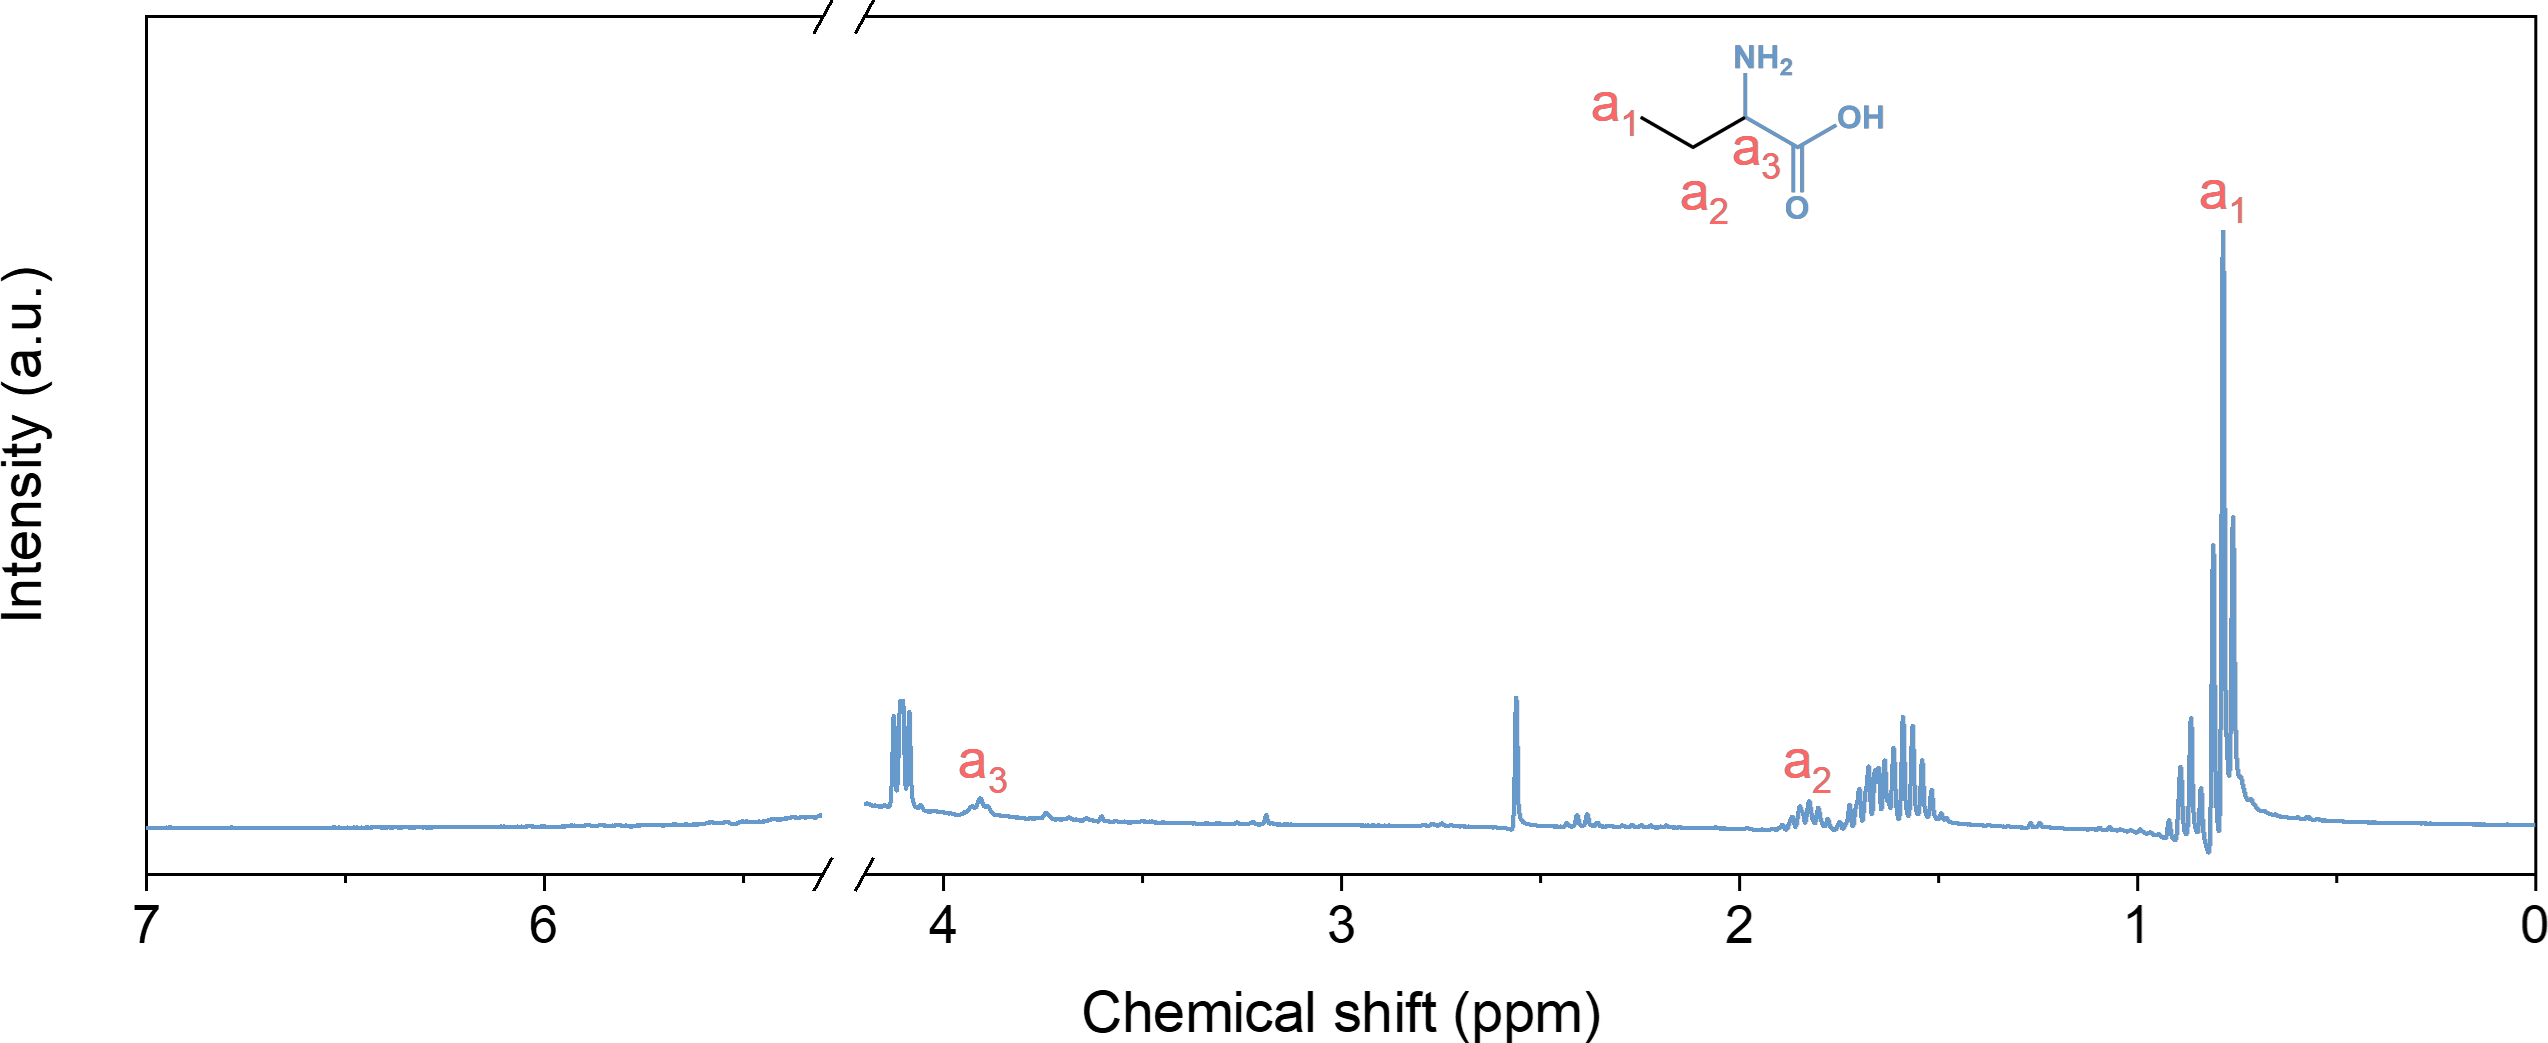


**Supplementary Figure 44.** 1H NMR spectra of electrolyte by using L-CBNs electrode after 1 h in electrocatalytic synthesis of 2-aminobutyric acid at -1.2 V vs. RHE.


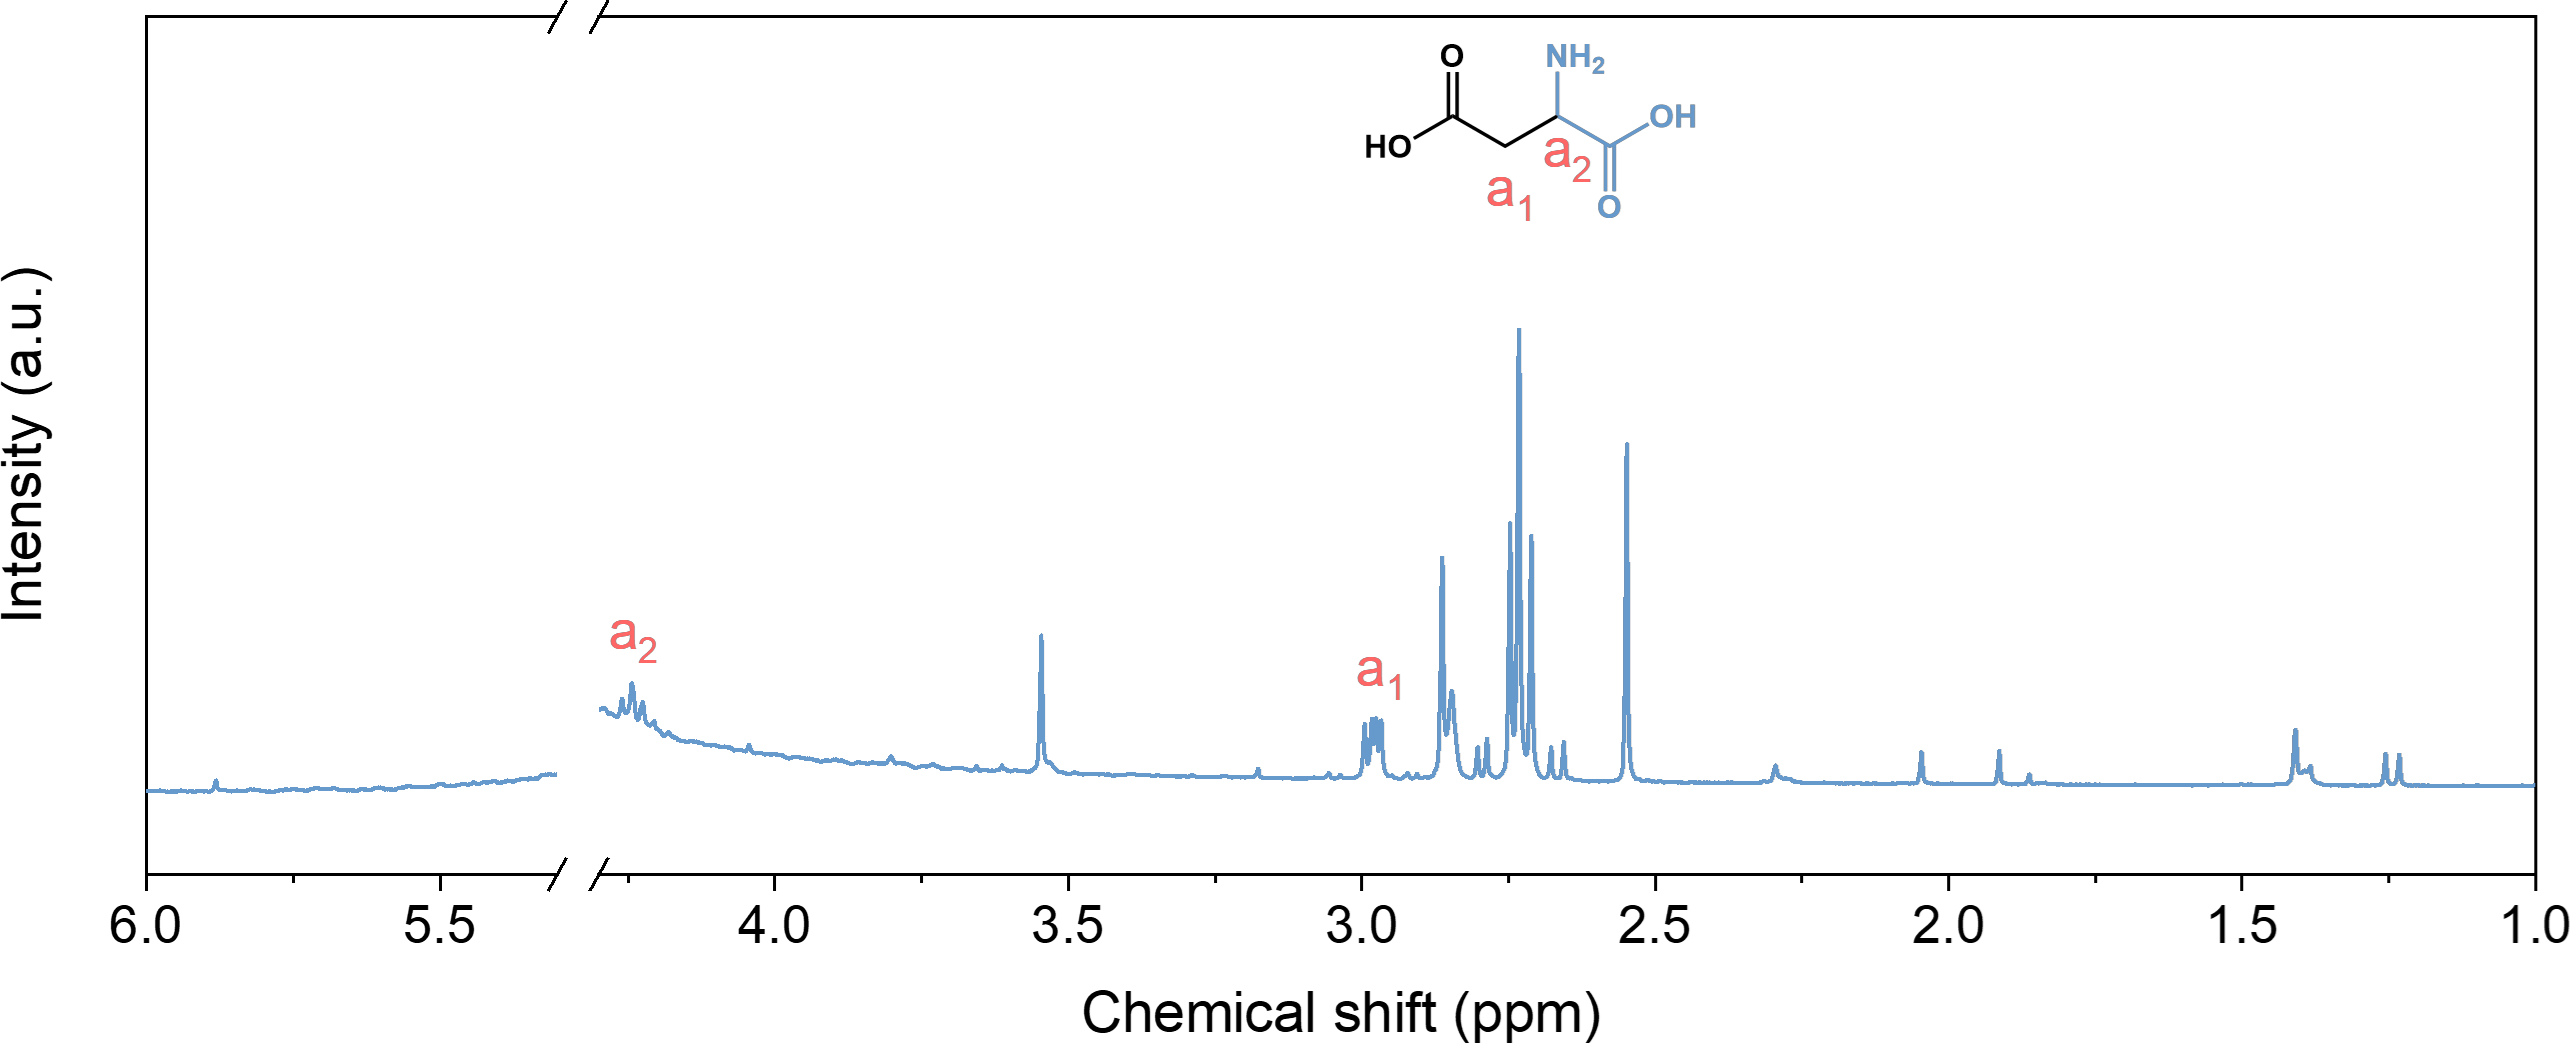


**Supplementary Figure 45.** 1H NMR spectra of electrolyte by using L-CBNs electrode after 1 h in electrocatalytic synthesis of aspartic acid at -1.2 V vs. RHE.


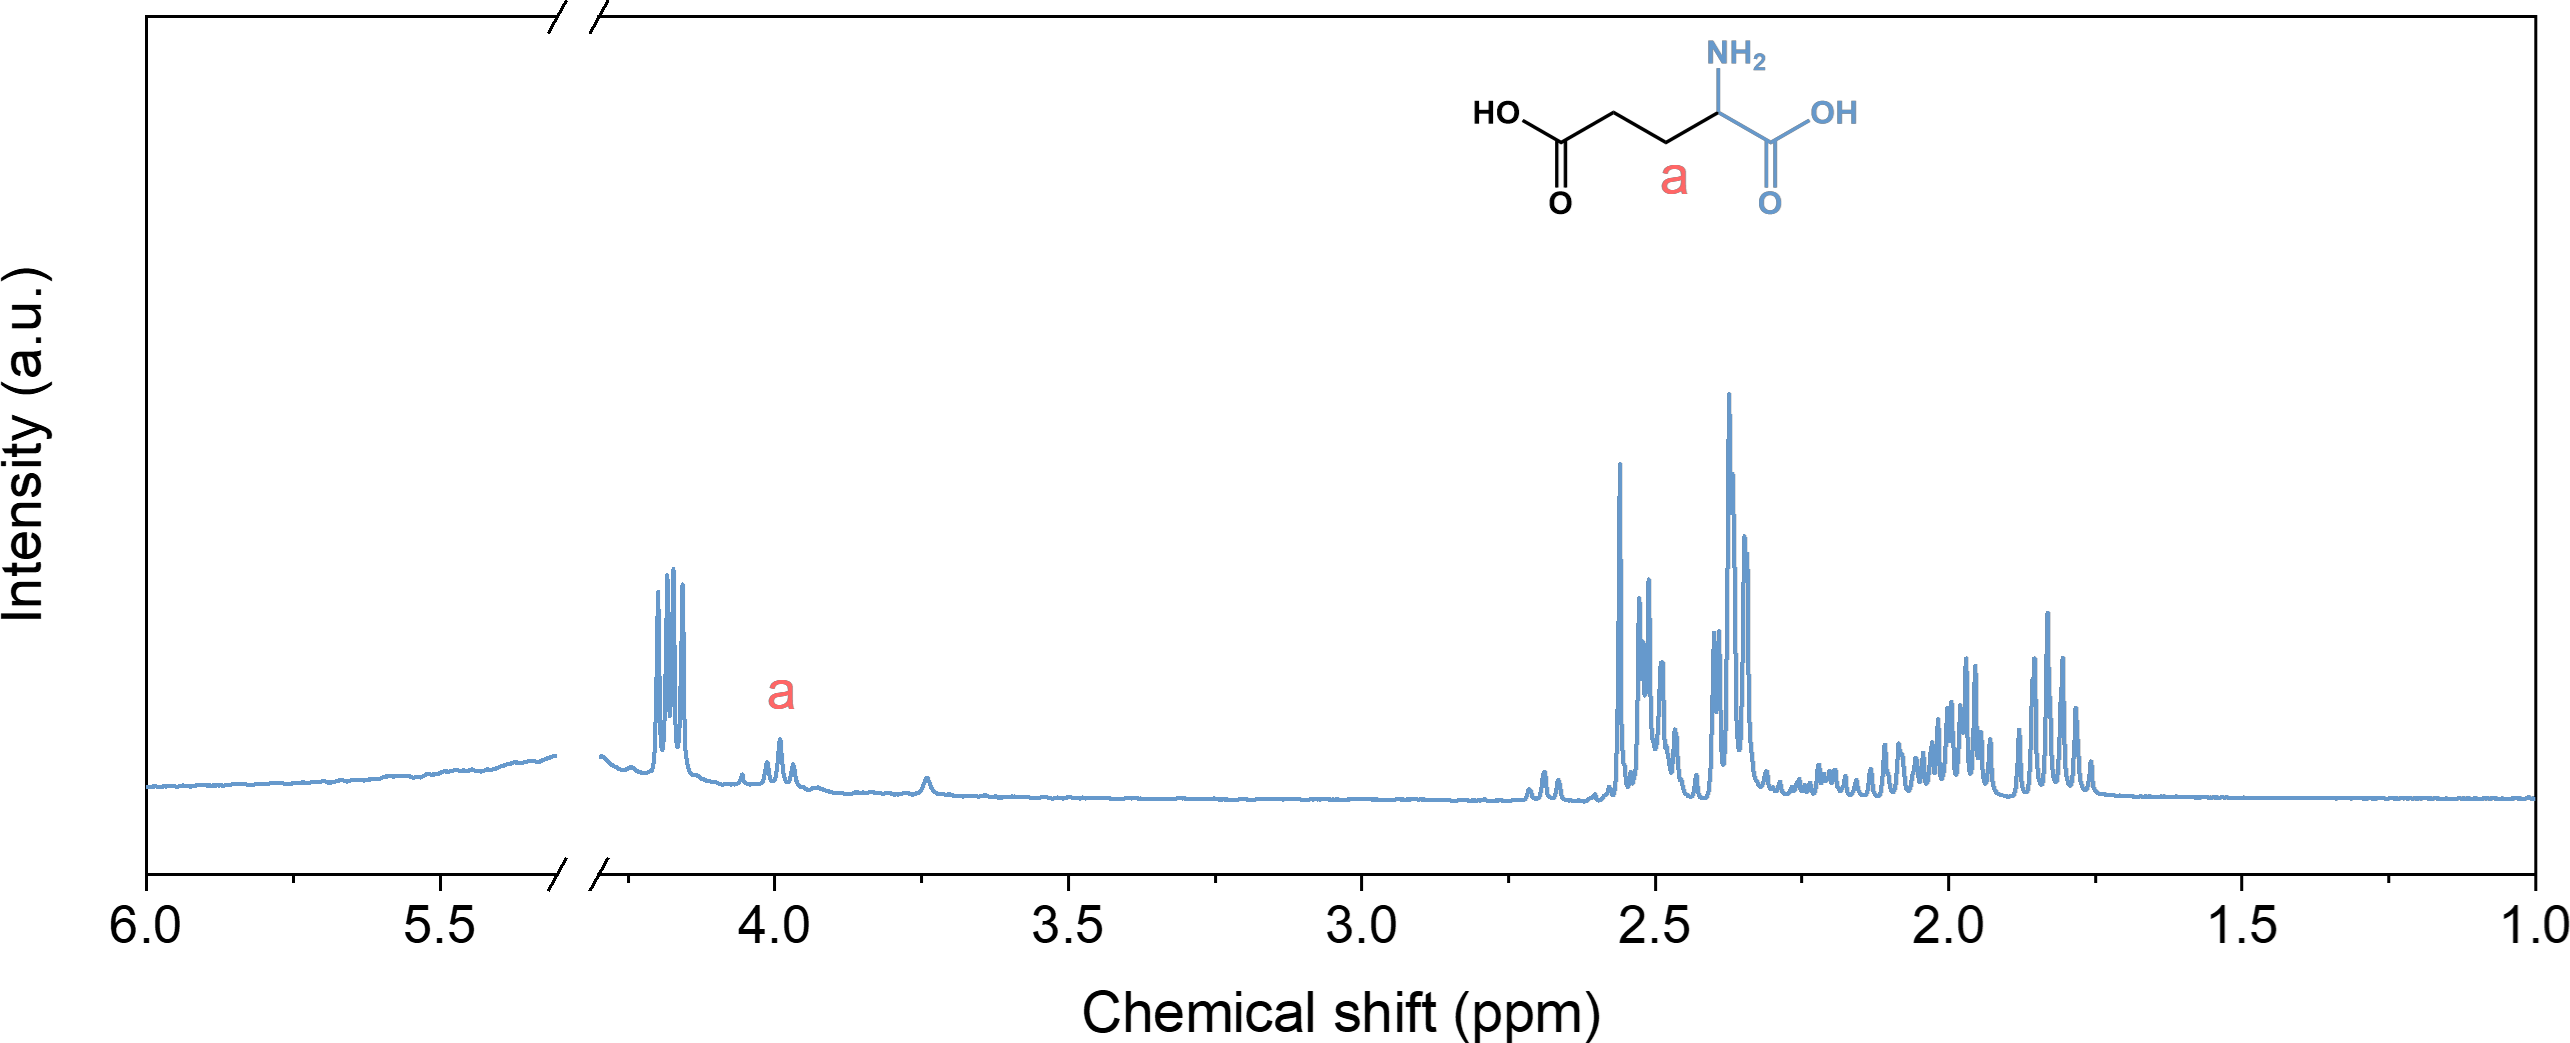


**Supplementary Figure 46.** 1H NMR spectra of electrolyte by using L-CBNs electrode after 1 h in electrocatalytic synthesis of glutamic acid at -1.2 V vs. RHE.


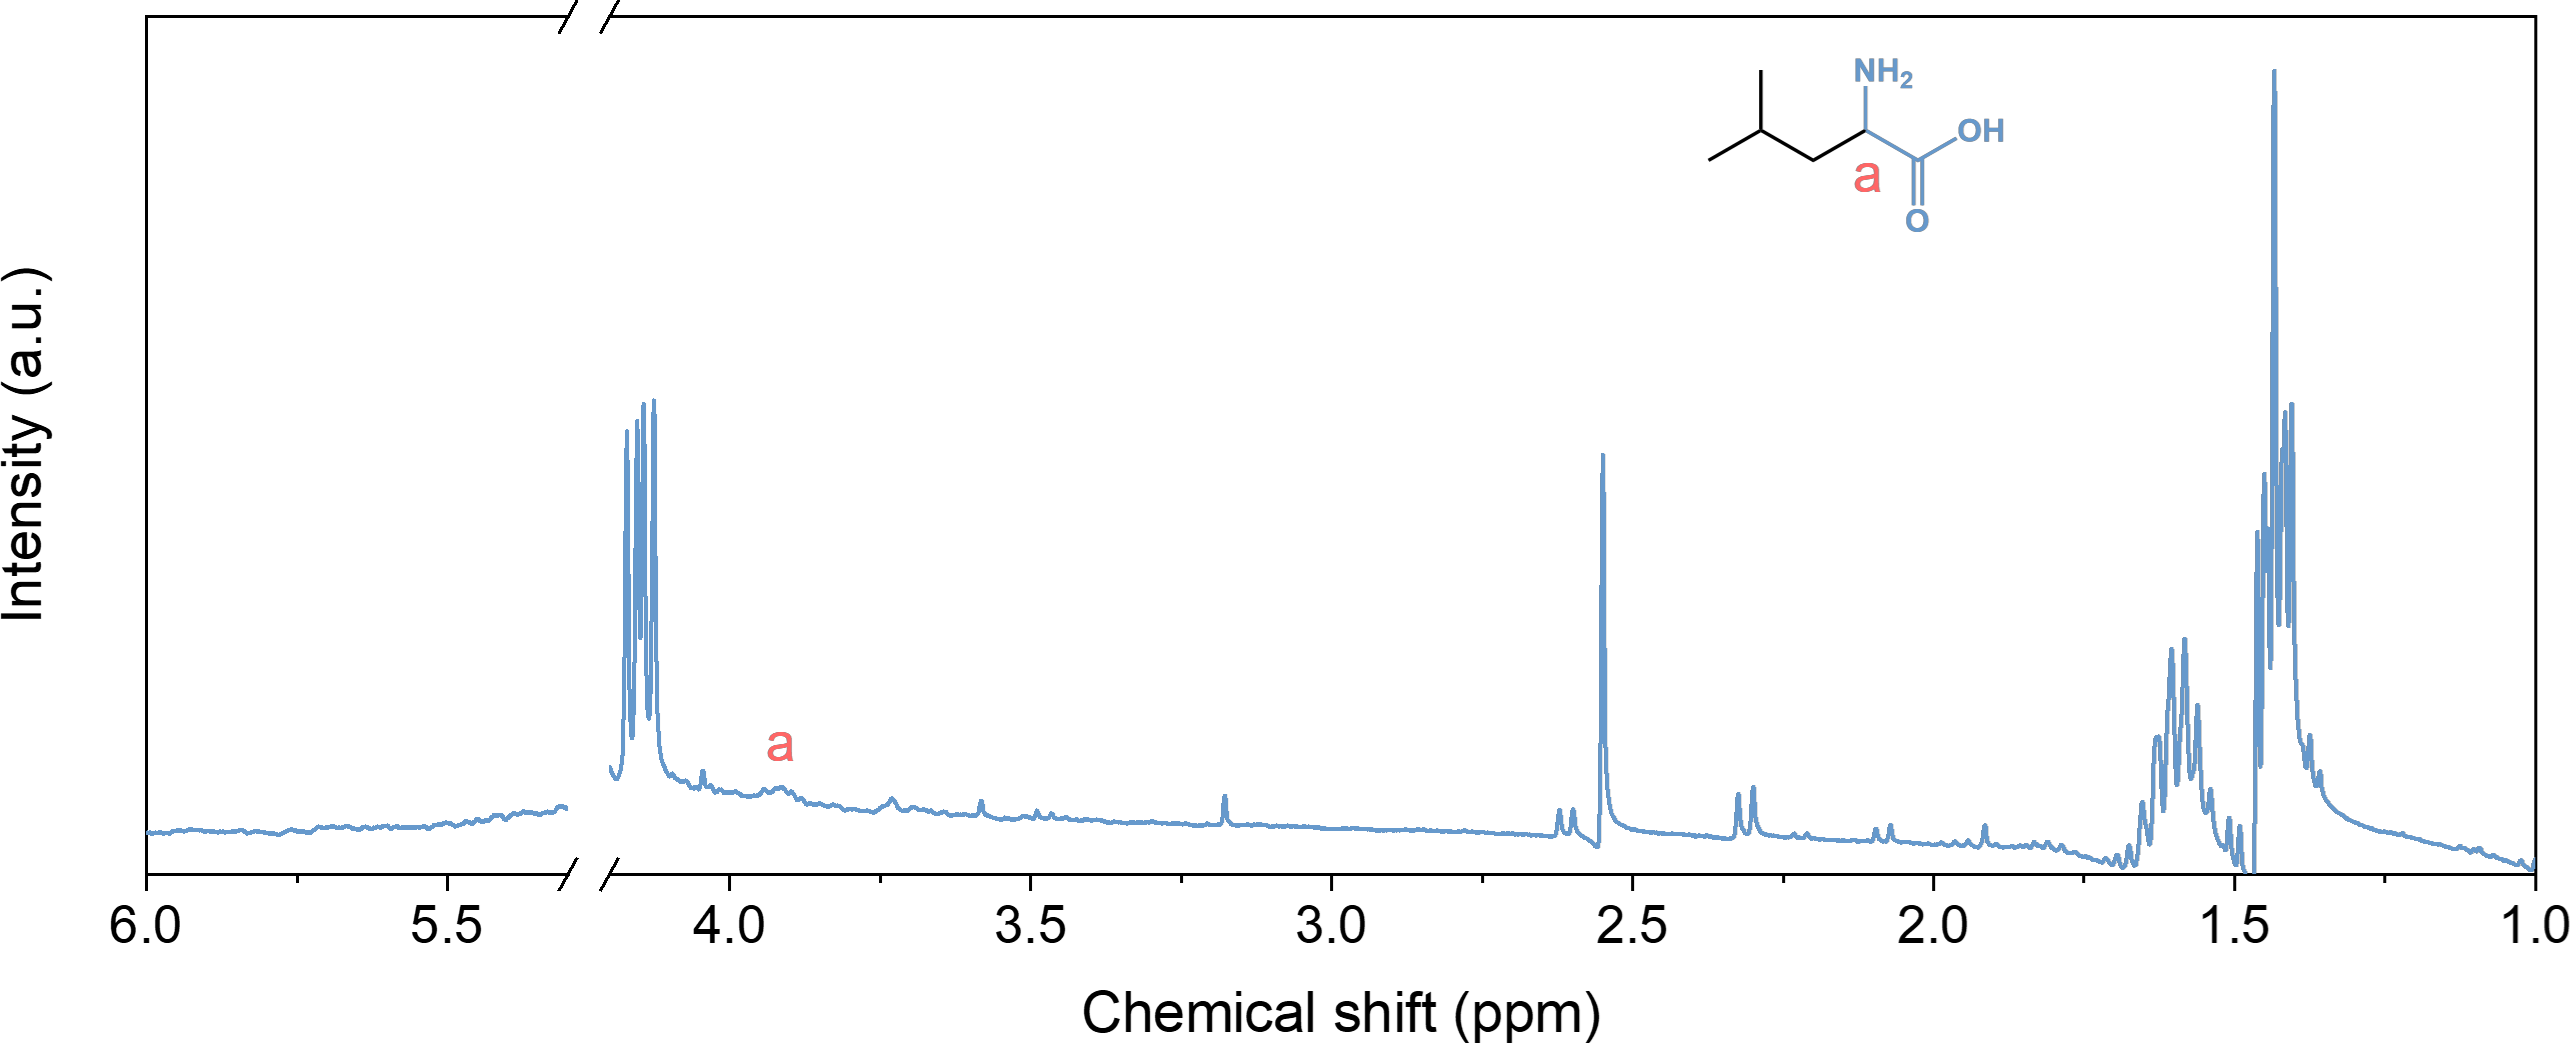


**Supplementary Figure 47.** 1H NMR spectra of electrolyte by using L-CBNs electrode after 1 h in electrocatalytic synthesis of leucine at -1.2 V vs. RHE.

**Supplementary Table 1.** Summary of reported electrocatalytic glycine synthesis performance.

| Catalyst | C source | N source | Yield rate  (*μ*mol h-1) | FE  (%) | Reference |
| --- | --- | --- | --- | --- | --- |
| Fe-N-C | Oxalic acid | NaNO3 | 450 | 64.2 | 3 |
| Fe-TiOx/Ti  WOx/D-CB | Glyoxylic acid | NaNO3 | 236.1 | 31 | 4 |
| Glyoxylic acid | KNO3 | 93 | 49.34 | 5 |
| AD-Fe/NC | Glyoxylic acid | NO | 26.8 | 12.6 | 6 |
| CoFe-SSM | Glyoxylic acid | NO | 164.46 | 41.2 | 7 |
| CuPb | Oxalic acid | NH2OH | 211 | 60 | 8 |
| PbSnBi | Oxalic acid | NaNO3 | 1125 | 57.2 | 9 |
| Co-HCNF | Glyoxylic acid | NO3- | 159.5 | 42.8 | 10 |
| F-Cu3-OF | Glyoxylic acid | 15NO2- | 354 | 42 | 11 |
| BM3 h-CNT | Glyoxylic acid | NH3·H2O | 16.6 | 87.4 | 12 |
| PbBi | Glyoxylic acid | NaNO3 | 625 | 46.1 | 13 |
| Cu/Bi-C@CF  e-Bi  TiO2-x | Glyoxylic acid Oxalic acid Oxalic acid | KNO3 | 205.09 | 65.9 | 14 |
| KNO3 | 555.7 | 79.1 | 15 |
| NaNO3 | 48.9 | 36 | 16 |
| Pb/Pb7Bi3  IL@Bi  **L-CBNs** | Oxalic acid | KNO3 | 172.9 | 91.8 | 17 |
| Oxalic acid | KNO3 | 727.2 | 81.1 | 18 |
| **Glyoxylic acid** | **KNO3** | **1120** | **81** | **This work** |

**Supplementary References**

1. Naaman, R., Paltiel, Y. & Waldeck, D. H. Chiral molecules and the electron spin. *Nat. Rev. Chem.* **3**, 250 (2019).

2. Banerjee-Ghosh, K. et al. Separation of enantiomers by their enantiospecific interaction with achiral magnetic substrates. *Science* **360**, 1331 (2018).

3. Cheng, Y. et al. Highly efficient electrosynthesis of glycine over an atomically dispersed iron catalyst. *J. Am. Chem. Soc.* **146**, 10084 (2024).

4. Zhu, Z. et al. Highly efficient synthesis of alpha-amino acids via electrocatalytic C-N coupling reaction over an atomically dispersed iron loaded defective TiO2. *Adv. Mater.* **37**, 2409864 (2025).

5. Wu, G. et al. Boosting amino acid synthesis with WOx sub-nanoclusters. *Adv. Mater.* **37**, 2500843 (2025).

6. Xian, J. et al. Electrocatalytic synthesis of essential amino acids from nitric oxide using atomically dispersed Fe on N-doped carbon. *Angew. Chem. Int. Ed.* **62**, e202304007 (2023).

7. Xian, J. et al. Electrosynthesis of α-amino acids from NO and other NOx species over CoFe alloy-decorated self-standing carbon fiber membranes. *Angew. Chem. Int. Ed.* **62**, e202306726 (2023).

8. Broersen, P. J. L. et al. Enhancing electrocatalytic synthesis of glycine with CuPb1ML electrode synthesized via Pb UPD. *ChemCatChem* **16**, e202301370 (2024).

9. Wang, K., Li, P. & Zhang, B. Industrial-grade electrocatalytic synthesis of glycine from oxalic acid and nitrate using a porous PbSnBi catalyst. *Appl. Catal. B: Environ.* **361**, 124653 (2025).

10. Xian, J. et al. Upgrading waste NOx into amino acids via electrocatalysis on Co nanoparticles encapsulated in hollow carbon nanofibers. *Sci. China Chem.* **67**, 1946 (2024).

11. Li, N. et al. Hydrophobic trinuclear copper cluster-containing organic framework for synergetic electrocatalytic synthesis of amino acids. *Adv. Mater.* **36**, 2311023 (2024).

12. Xiao, Y. et al. Electrocatalytic amino acid synthesis from biomass-derivable keto acids over ball milled carbon nanotubes. *Green Chem.* **25**, 3117 (2023).

13. Li, P., Wang, K. & Zhang, B. Electrosynthesis of amino acids from biomass and nitrate at industrial current densities using porous PbBi electrodes. *ACS Appl. Mater. Interfaces* **16**, 57171 (2024).

14. Xian, J., Cai, K., Liao, P., Wang, S. & Li, G. Cu-Bi bimetallic catalysts derived from metal-organic framework arrays on copper foam for efficient glycine electrosynthesis. *Angew. Chem. Int. Ed.* **64**, e202417130 (2025).

15. Liu, S. et al. Electrochemical Lattice engineering of bismuthene for selective glycine synthesis. *Adv. Mater.* **37**, 2500843 (2025).

16. Takashima, T., Wakatsuki, K. & Irie, H. Electrochemical synthesis of glycine from oxalate and nitrate ions using titanium oxide electrode. *Appl. Catal. B: Environ.* **371**, 125272 (2025).

17. Li, P.; Wang, Y. et al. Efficient glycine electrosynthesis via CO2-recyclable hydrogen donation on Pb/Pb7Bi3 heterointerfaces. *Angew. Chem. Int. Ed.* **64**, e202514321 (2025).

18. Wang, H. et al. Imidazolium radical-mediated electron transfer enhances electrochemical C–N coupling for glycine synthesis. *Nat. Synth.* (2025). DOI: 10.1038/s44160-025-00892-7.
